# Supplementary material for: Developing non-radioactive, radical methods to screen for radiolytic stability
Source: Royal Society of Chemistry journal article supplement (doi:10.1039/d4cc03762f), 2024-01-01
Supplement: d4cc03762f1.pdf [file d4cc03762f1.pdf]

## Developing Non-Radioactive, Radical Methods to Screen for Radiolytic Stability

### Supplemental Information

Brandon G. Wackerle,<sup>‡a</sup> Madison R. Vicente,<sup>‡a</sup> Fatema Tuz Zohara,<sup>a</sup> Dean R. Peterman,<sup>b</sup> Modi Wetzler,<sup>a</sup> and Julia L. Brumaghim<sup>a\*</sup>

<sup>a</sup>Department of Chemistry, Clemson University, Clemson, SC 29634-0973, USA

E-mail: brumagh@clemson.edu

<sup>b</sup>Aqueous Separations and Radiochemistry Department, Idaho Falls, ID 83415-6158, USA

<sup>‡</sup> These authors contributed equally to this work.

#### Table of Contents

|                                                                                                                                          |    |
|------------------------------------------------------------------------------------------------------------------------------------------|----|
| Experimental and synthetic methods .....                                                                                                 | 2  |
| <sup>1</sup> H and <sup>13</sup> C { <sup>1</sup> H} NMR spectra of DEHBA, DEHiBA, and <i>t</i> -butyl hydrazone (Figures S1-S6) .....   | 6  |
| Radical assay and gamma radiolysis total ion chromatograms (TICs) for DEHBA and DEHiBA (Figure S7-S12) .....                             | 9  |
| Mass spectrometry data for selected DEHBA and DEHiBA degradation products (Figure S13) .....                                             | 12 |
| Graphs of DEHBA and DEHiBA degradation products for radical assay and gamma radiolysis (Figures S14-S17) .....                           | 12 |
| Context explanation for and comparison of DEHBA and DEHiBA degradation products in radical assay and gamma radiolysis (Figure S18) ..... | 15 |
| All major DEHBA and DEHiBA degradation products formed in the radical assay and gamma radiolysis (Table S1) .....                        | 16 |
| Percent relative standard deviation of the TICs for a given concentration of azoperoxide (mM) or radiation dose (kGy; Table S2) .....    | 23 |
| Calibration curves of DEHBA and DEHiBA in toluene (Figures S19-S22) .....                                                                | 24 |
| Gamma radiolysis dose-response curves for DEHBA and DEHiBA (Figures S23 and S24) .....                                                   | 26 |
| Bibenzyl calibration curves in toluene (Figures S25 and S26) .....                                                                       | 27 |
| DEHBA and DEHiBA structures with atom labels for density functional theory (DFT) calculations (Figure S27) .....                         | 28 |
| DFT calculation data for the ground state and radical energies of DEHBA, DEHiBA, and toluene (Tables S3-S5) .....                        | 29 |
| DFT Cartesian coordinates for DEHBA, DEHiBA, and toluene (Table S6) .....                                                                | 33 |
| References .....                                                                                                                         | 56 |

## Experimental Methods

*General.* Butyryl chloride (Thermo Scientific), bis(2-ethylhexyl)amine (Thermo Scientific), isobutyryl chloride (Alfa Aesar), *N,N*-diisopropylethylamine (Chem-Impex International), *tert*-butylhydrazone hydrochloride (TCI America), and bibenzyl (TCI America) were of reagent quality and used as received. GC-MS grade toluene, acetone, and diethyl ether solvents were purchased from Fisher Chemical. Silica gel 40 – 63  $\mu\text{m}$  (230 – 400 mesh) was purchased from Silicycle and used as received.

*Instrumentation.* Gamma radiolysis was performed in an MDS Nordion GammaCell 220 Excel self-contained  $^{60}\text{Co}$  gamma irradiator at Idaho National Laboratory (INL). Initial gas chromatography-mass spectrometry (GC-MS) studies were conducted at INL on a Thermo Scientific Trace GC Ultra coupled with an ISQ series mass spectrometer. All irradiated samples were then shipped to Clemson University for in-depth analysis and further GC-MS studies using a Shimadzu GC-2010 Plus coupled with a QP2010 SE mass spectrometer.

GC-MS studies at INL and Clemson were conducted using a Resteck SH-Rxi-5MS 30 m  $\times$  0.25 mm  $\times$  0.25  $\mu\text{m}$  df column with the following method parameters: injector 280  $^{\circ}\text{C}$ ; split injection; oven conditions of 40 to 60  $^{\circ}\text{C}$  (5  $^{\circ}\text{C}/\text{min}$ ), 60 to 260  $^{\circ}\text{C}$  (20  $^{\circ}\text{C}/\text{min}$ ), and hold at 260  $^{\circ}\text{C}$  for 5 min; ion source 200  $^{\circ}\text{C}$ ; and interface 250  $^{\circ}\text{C}$ . The MS program was gated to remove the very large toluene and parent monoamide peaks so that minor degradation products could be observed: 0 min to 2.8 min filament on, 2.8 to 4.5 min filament off, and 4.5 – 19 min filament on. The filament was also turned off from 13.15 – 13.45 and 12.80 – 13.10 min for DEHBA and DEH*i*BA respectively. All GC-FID was conducted on the Thermo Scientific instrument at INL using a TR-35ms 30 m  $\times$  0.32 mmID  $\times$  0.25  $\mu\text{m}$  df column and the same oven conditions as described for the GC-MS analyses.

$^1\text{H}$ ,  $^{13}\text{C}\{^1\text{H}\}$ , and NMR spectra were recorded using a Bruker Avance Neo 300 MHz or 500 MHz spectrometer. Chemical shifts  $\delta$  (in ppm) for  $^1\text{H}$  and  $^{13}\text{C}$  NMR are referenced to tetramethylsilane relative to solvent as an internal standard. Coupling constants ( $J$ ) are expressed in Hertz (Hz). Elemental analyses were performed at Atlantic Microlab, Inc. (Norcross, GA). UV-vis studies were performed using a Thermo Scientific BioMate 160 UV-visible spectrophotometer. All syntheses and purifications were performed at ambient conditions unless otherwise specified.

*Tert-butyl hydrazone synthesis (I).* **1** was synthesized by combining sodium hydroxide, *tert*-butyl hydrazine hydrochloride, acetone, water, and acetic acid as reported,<sup>1</sup> with the exception of scaling up the reaction using 10.22 g, 82 mmol of *tert*-butyl hydrazine hydrochloride and 2.5 equivalents of acetone (15 mL, 203 mmol) and stirring for 48 h instead of 2 h. The reaction mixture was washed with ether (3  $\times$  80 mL) and combined. These combined ether layers were then washed with deionized water (1  $\times$  100 mL), dried over  $\text{MgSO}_4$ , and filtered. The solvent was removed under vacuum to yield a clear, colorless oil. The longer reaction time and the addition of a water wash of the combined ether layers yielded **1** that was 95% pure by  $^1\text{H}$  NMR measurements, preventing vacuum distillation from being needed as reported.<sup>1</sup> **Note:** **1** decomposed ~27% in two months stored at -20  $^{\circ}\text{C}$ . Yield: 39%.  $^1\text{H}$  NMR spectroscopy ( $\text{CDCl}_3$ , 500 MHz):  $\delta_{\text{H}}$  1.17 (9H, s), 1.70 (3H, s), 1.91 (3H, s), 4.19 (1H, bs).  $^{13}\text{C}$  NMR ( $\text{CDCl}_3$ , 75 MHz)  $\delta_{\text{C}}$  15.35, 25.58, 28.71, 53.13, 144.23.

*General amide synthesis.* A 500 mL round-bottomed flask was charged with a stir bar and flame dried before use. After cooling, the secondary amine (26 - 250 mmol, 1 equiv) was added, followed by dichloromethane (100 mL; dried over sodium sulfate for at least 24 h). The clear,

colorless/light yellow solution was stirred in an ice bath under a nitrogen atmosphere. After cooling, *N,N*-diisopropylethylamine (29 – 276 mmol, 1.1 equiv) was added, and the reaction mixture was stirred cold for 10 min. The flask was then vented with needle through a rubber septum, and the appropriate acyl chloride (29 – 276 mmol, 1.1 equiv) was added dropwise to the reaction while stirring on ice over 10 min. **Note:** this reaction is exothermic and releases HCl gas, so the acyl chloride should be added slowly and carefully.

After acyl chloride addition, the vent needle was removed, and the reaction was allowed to stir for 24 – 48 h and warm slowly to room temperature. During this time, the reaction mixture varied between light to dark yellow, and in some cases, red. The reaction then was poured into a separatory funnel, the organic layer was separated, and then it was washed successively with 75 mL of the following: 1.0 M KOH, 1.0 M HCl, saturated NaHCO<sub>3</sub>, and deionized water. After wash steps were complete, the organic layer was separated, dried over anhydrous magnesium sulfate, filtered, and evaporated under reduced pressure to yield the products as yellow oils. The crude monoamides were purified using flash column chromatography using 100% dichloromethane as the eluent (*R<sub>f</sub>* = 0.4 DEHBA, *R<sub>f</sub>* = 0.68 DEH*i*BA).

DEHBA: Yield 82%. <sup>1</sup>H NMR (CDCl<sub>3</sub>, 500 MHz): δ<sub>H</sub> 0.85 – 0.91 (12H, m), 0.95 (3H, t, *J* = 7.4 Hz), 1.18 – 1.36 (16H, m), 1.58 (1H, m), 1.67 (2H, sext, *J* = 7.5 Hz), 2.29 (2H, t, *J* = 7.5 Hz), 3.14 (2H, d, *J* = 7.6 Hz), 3.27 (2H, m). <sup>13</sup>C NMR (CDCl<sub>3</sub>, 125 MHz) δ<sub>C</sub> 10.84, 11.05, 14.19, 14.20, 14.23, 19.19, 23.19, 23.25, 23.96, 24.05, 28.90, 28.97, 30.68, 30.75, 35.63, 37.15, 38.70, 48.85, 51.57, 173.58. Anal. Calcd for C<sub>20</sub>H<sub>41</sub>NO: C, 77.10; H, 13.27; N, 4.50. Found: C, 77.28; H, 13.32; N, 4.57.

DEH*i*BA: Yield 84%. <sup>1</sup>H NMR (CDCl<sub>3</sub>, 500 MHz): δ<sub>H</sub> 0.85 – 0.91 (12H, m), 1.11 (6H, d, *J* = 6.5 Hz), 1.18 – 1.34 (16H, m), 1.55 (1H, sept, *J* = 6.0 Hz), 1.68 (1H, sept, *J* = 6.0 Hz), 2.80 (1H, sept, *J* = 6.5 Hz), 3.16 (2H, d, *J* = 6.5 Hz), 3.25 (m, 2H). <sup>13</sup>C NMR (CDCl<sub>3</sub>, 125 MHz) δ<sub>C</sub> 10.84, 11.06, 14.19, 14.22, 19.78, 23.19, 23.24, 23.90, 24.03, 28.90, 28.96, 30.42, 30.64, 30.72, 37.26, 39.13, 49.19, 51.55, 177.87. Anal. Calcd for C<sub>20</sub>H<sub>41</sub>NO: C, 77.10; H, 13.27; N, 4.50. Found: C, 77.14; H, 13.27; N, 4.60.

*2-(tert-Butylazo)-2-hydroperoxypropane (azoperoxide) synthesis (2)*. A 25 mL graduated cylinder was charged with **1** (615 mg, 4.796 mmol) dissolved in toluene (10 mL) and capped with a septum secured with parafilm to prevent evaporation and monitor gas bubbling. A long needle was attached to tubing connected to an oxygen tank. This long needle was then put through the septum (two exit needles were also inserted into the septum to allow for gas to escape; see picture) and the oxygen tank was turned on to vigorously bubble oxygen into the solution for 1-2 h. Azoperoxide formation was followed via UV-Vis spectroscopy. To measure azoperoxide concentration, an aliquot of the solution in the graduated cylinder (0.1 mL) was added to 1.9 mL toluene (2 mL total volume) and placed in a 3 mL quartz cuvette with a path length of 1 cm. Note: toluene evaporated during oxygen bubbling, so prior to removing an aliquot of the reaction mixture, toluene was added to the reaction mixture to ensure that it remained at its starting volume of 10 mL.

The UV-Vis absorbance was measured at 368 nm, the absorbance maximum for **2**. Aliquots were checked in this manner starting after 1 h of oxygen bubbling, and oxygen bubbling was discontinued when the

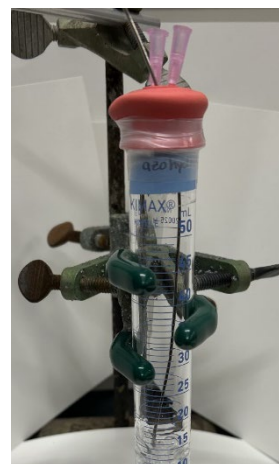

Picture of experimental setup for azoperoxide synthesis.

absorbance at 382 nm leveled off, indicating maximum azoperoxide formation. The last absorbance measurement of azoperoxide **2** was used to calculate final azoperoxide concentration using a reported extinction coefficient of  $17 \text{ M}^{-1}\text{cm}^{-1}$  in benzene,<sup>1</sup> correcting for the dilution when preparing the UV-Vis sample. Azoperoxide generation using this method was successful in benzene and toluene but not in *n*-dodecane, acetonitrile, or dioxane.

*Gamma radiolysis of monoamides.* A stock solution of each monoamide (100 mM) was prepared in toluene and partitioned in 5.0 mL aliquots into 20 mL screw-cap scintillation vials. Irradiation was performed using a cobalt-60 irradiator at the Idaho National Laboratory. Samples were irradiated to approximately 50, 250, 500, 650, and 1000 kGy at a dose rate of 2-3 kGy·h<sup>-1</sup>, measured using Fricke dosimetry and correcting for cobalt-60 decay.<sup>2</sup> The absorbed doses were also corrected by multiplying by toluene density (0.87 g/mL).<sup>2</sup> All irradiations were performed in triplicate, except for ~50 and ~500 kGy which were performed in duplicate.

*Azoperoxide assay.* A 1.0 M monoamide stock solution was prepared volumetrically by weighing 1.56 g (5.0 mmol) of the corresponding monoamide into a 5.00 mL volumetric flask and filling to the line with toluene. In a 20 mL scintillation vial, varying volumes of a freshly synthesized ~480 mM azoperoxide stock solution in toluene (yielding 20, 40, 80, 120, 250, or 400 mM final concentrations) were added to a toluene solution containing 0.2 mL of the 1.0 M monoamide stock solution. Additional toluene was then added to the monoamide/azoperoxide solution to reach a total volume of 2.0 mL for each sample (100 mM final amide concentration). Azoperoxide-only (20, 40, 80, 120, 250, or 400 mM), amide-only (100 mM), and toluene-only samples were also prepared as controls. Samples were capped and heated at 75 °C for 2 h in a water bath to generate the radical species. All assays were performed in triplicate.

*GC-MS/GC-FID analysis.* To analyze the GC-MS and GC-FID data, all the peaks in each TIC were integrated using the automatic integration function in the analysis software, Shimadzu LabSolutions version 4.54. The automatic integration was checked, and smaller intensity peaks were manually integrated, if necessary. Degradation products were identified as any peak not observed in the control TICs, and mass spectra were collected for all degradation products. The chemical identities of the degradation products were determined from their parent *m/z* peaks in the mass spectra, without distinguishing between isomers of the same mass. The percentage of each product was determined by dividing its TIC peak area by the total of the peak areas in the TIC. Several parent peaks that eluted close together had the same *m/z* values, so these were identified as isomers, based on the small energy differences for isomers found in DFT calculations, and their peak areas were combined. Generally, the vast majority of peaks that were identified as isomers with the same parent *m/z* values eluted within 1 – 2 minutes from one another. In a very few cases, there were degradation product isomers identified with larger differences between the retention times (retention times are provided in Table S1). All identified degradation products were within  $\pm 1$  *m/z* of theoretical values, consistent with instrument error. In the few cases where parent *m/z* peaks were within  $\pm 1$  *m/z* of each other for two (or more) TIC peaks, they were treated as the same degradation product. All radiolytic and radical assay degradation products with normalized peak area percentages  $\geq 1\%$  are listed in Table S1.

The radiolytic and radical assay samples were analyzed in triplicate by comparing the TICs for each set of conditions. To obtain the percent relative standard deviation for all TICs of each dose, TIC intensities were averaged at each retention time for the triplicate measurements, and standard deviations were calculated for each point. These standard deviations were used to calculate a relative standard deviation for each set of triplicate TICs, ranging from  $2.5 \pm 2.7\%$  to

$4.6 \pm 3.3\%$  for the radical assay and from  $3.4 \pm 3.0\%$  to  $5.0 \pm 7.0\%$  for gamma radiolysis across the entire TIC (Table S2).

*Radical and gamma radiolytic correlation using bibenzyl.* In both the radiolysis and the radical assay samples, bibenzyl was formed from the coupling of two tolyl radicals (retention time  $\sim 10.6$  min), and its formation was linear with respect to dose. Therefore, bibenzyl formation was used as an internal standard to correlate these two methods. A GC-MS calibration curve was determined using commercial bibenzyl (0.1 to 3 mM), and then radiolysis and radical assay samples for the middle and high doses were diluted so that the bibenzyl concentration was in the middle of the linear region of the calibration curve ( $\sim 0.5$  mM; the lowest-dose radiation and azoperoxide samples did not require dilution). The TIC bibenzyl peak in each sample was integrated, and the exact bibenzyl concentration was calculated from the calibration curve. Graphs of bibenzyl concentration vs. radiation dose or vs. azoperoxide concentration were used to correlate radiation dose with azoperoxide concentration (Figure 5).

*Density functional theory (DFT) calculations.* Quantum chemical calculations were performed using the Gaussian 16 software package.<sup>3</sup> Geometry optimization calculations were performed using the B3LYP theory with a 6-311g+(d,p) basis set specified in Cartesian format. The initial geometry was drawn using Avogadro software (version 1.2.0).<sup>4</sup> Conformer searches were conducted in Avogadro, employing random and weighted rotor searches with 1000 conformers. The weighted rotor search provided generally lower energy values compared to the random rotor search. A systematic rotor search was not used because it required 10-24 h to complete for each molecule, compared to 5 to 10 min for other methods, and the energy differences from the resulting calculations were negligible.

MMFF94 force fields are used to predict molecular conformations and energy minima but lack specific parameterization for radicals, since they are not closed-shell molecules.<sup>5,6</sup> To avoid this issue, radical energies were determined using a single-point energy calculation from the initial monoamide geometry, systematically removing one hydrogen atom at a time from different sites without adjusting atomic positions. This mimics hydrogen abstraction by a radical species, a major pathway for monoamide decomposition.<sup>7</sup> The energy difference between each radical and the ground state was calculated to determine the relative energies of radical formation.

For DEHBA and DEH*i*BA, radical species near the amide functional group have lower energies than radical species farther from the functional group (Tables S3-S4). The C-terminal and N-terminal radicals closest to the amide in DEHBA and DEH*i*BA have very little difference in energy (less than 5 kJ/mol). For DEHBA, the lowest-energy radicals are the *cis* radical of the N-terminal C2 carbon (see atom numbering scheme in Figure S26) and the *cis* radical of the N-terminal C1 carbon. For DEH*i*BA, the lowest energy radicals are the *cis* radical of the N-terminal C1 carbon and the *trans* radical of the N-terminal C2 carbon. Most of the N-terminal radicals have lower formation energies (radical - ground state energies) for DEHBA than DEH*i*BA, whereas C-terminal radicals have lower formation energies for DEH*i*BA compared to DEHBA. The energy differences between most DEHBA and DEH*i*BA radicals are less than 8 kJ/mol, differences that are low enough that radicals may form at multiple locations during radiolytic or radical treatment. This result is consistent with the formation of multiple isomers of monoamide degradation products, suggesting that after irradiation or azoperoxide treatment, degradation products with the same *m/z* values by GC/MS that elute close together in the TICs are isomers of the same products.

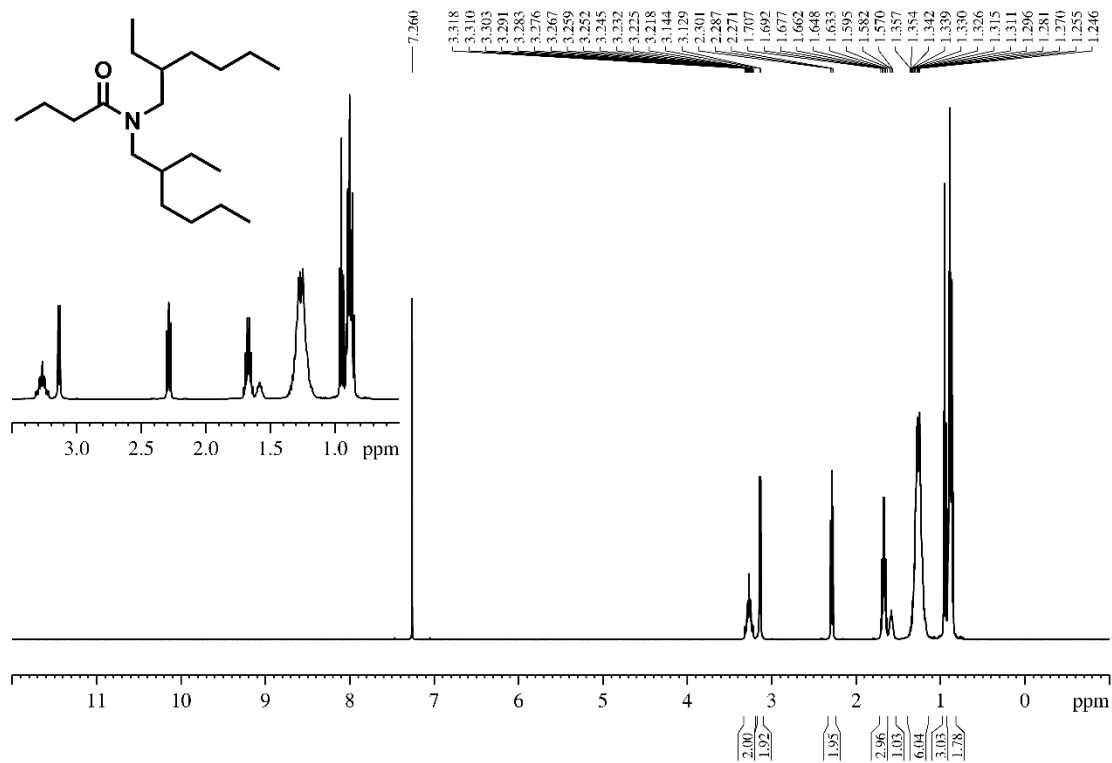

Figure S1.  $^1\text{H}$  NMR spectrum (CDCl<sub>3</sub>, 500 MHz) of DEHBA.

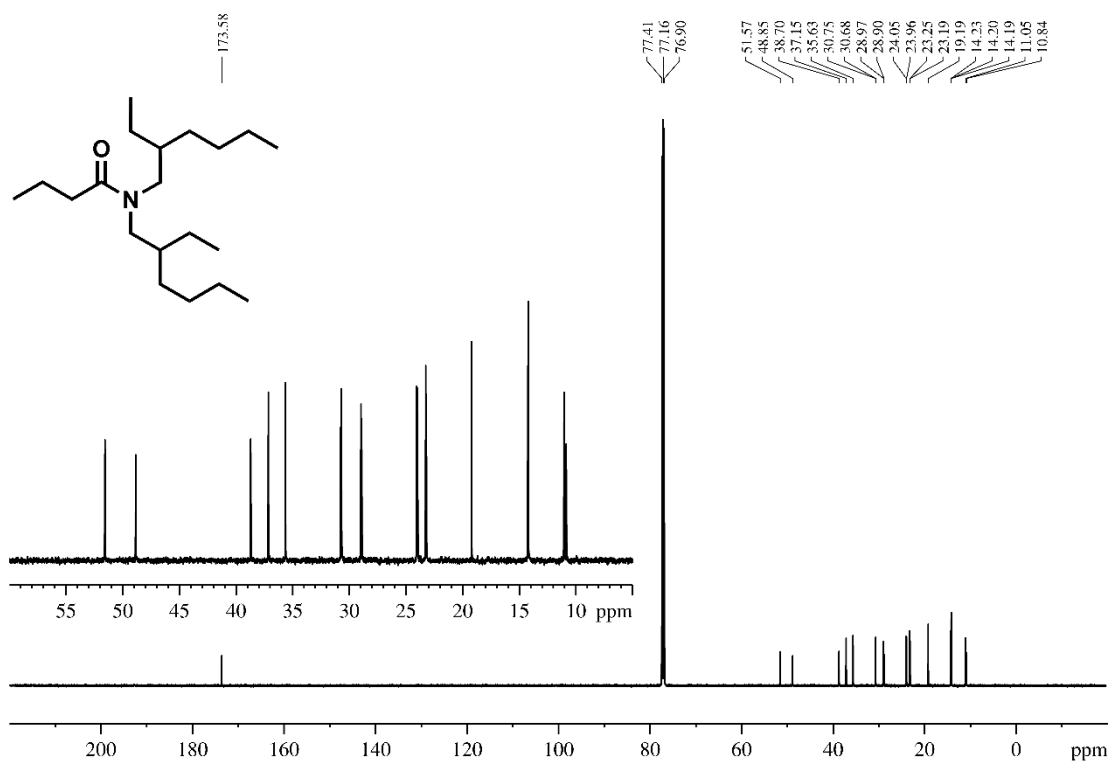

Figure S2.  $^{13}\text{C}\{^1\text{H}\}$  NMR spectrum (CDCl<sub>3</sub>, 125 MHz) of DEHBA.

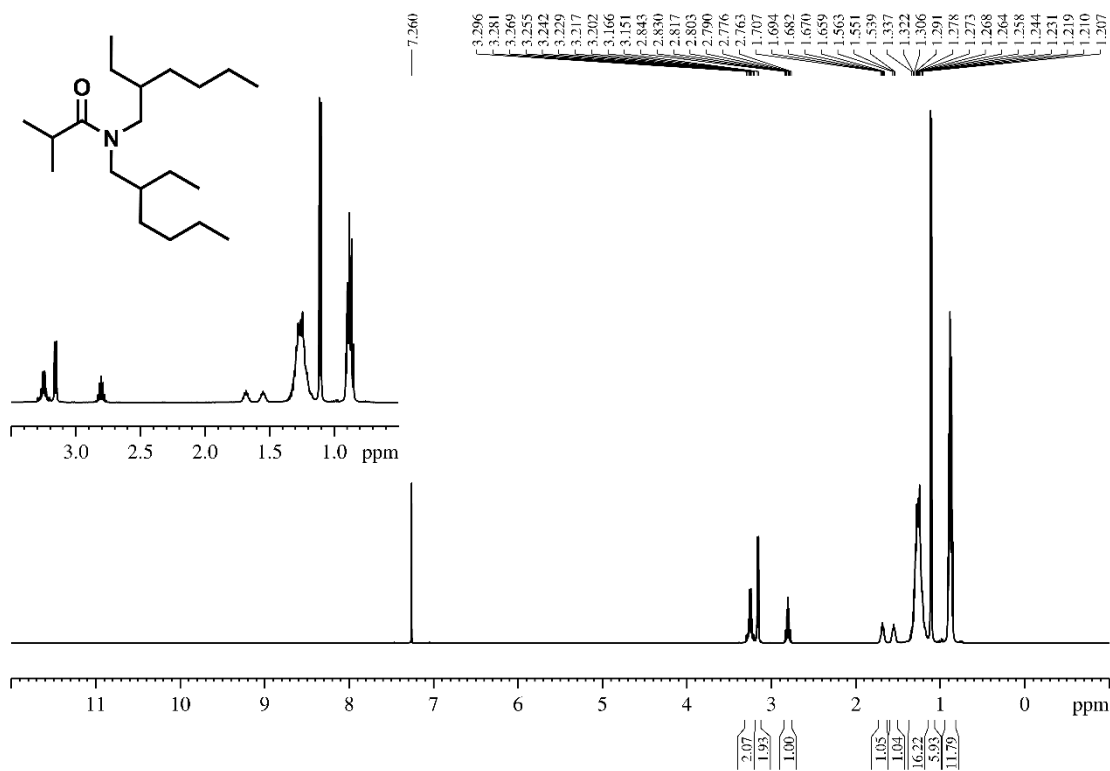

Figure S3. <sup>1</sup>H NMR spectrum (CDCl<sub>3</sub>, 500 MHz) of DEH/BA.

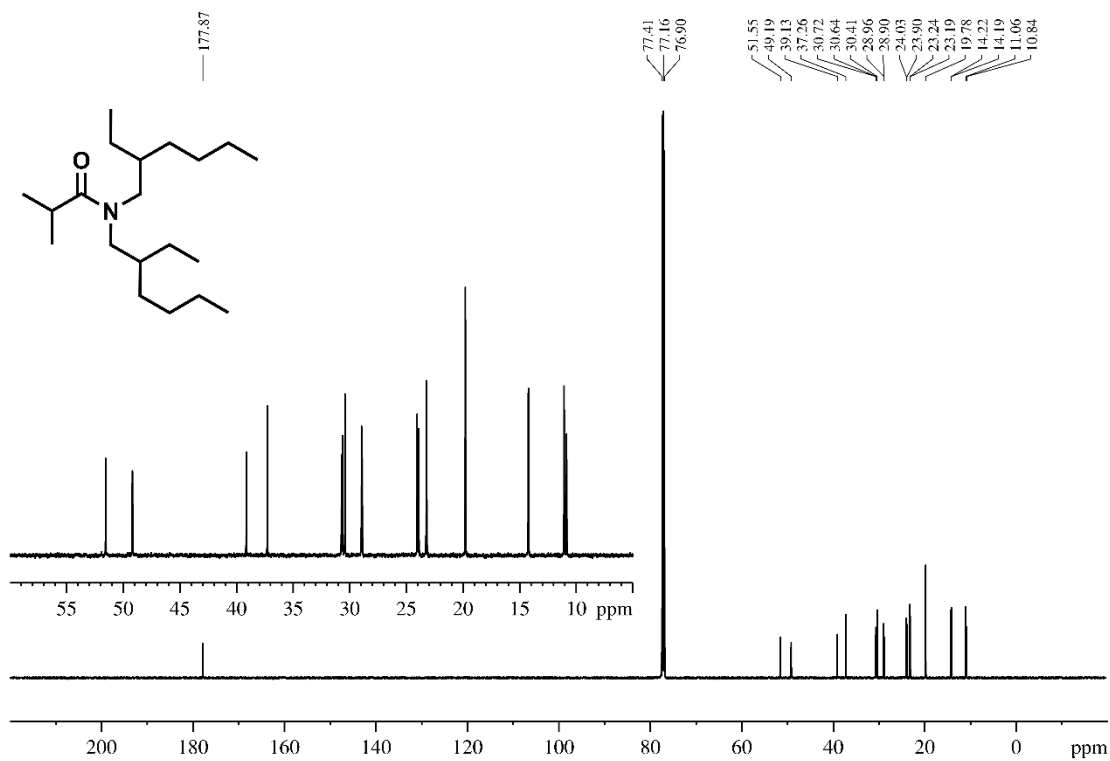

Figure S4. <sup>13</sup>C{<sup>1</sup>H} NMR spectrum (CDCl<sub>3</sub>, 125 MHz) of DEH/BA.

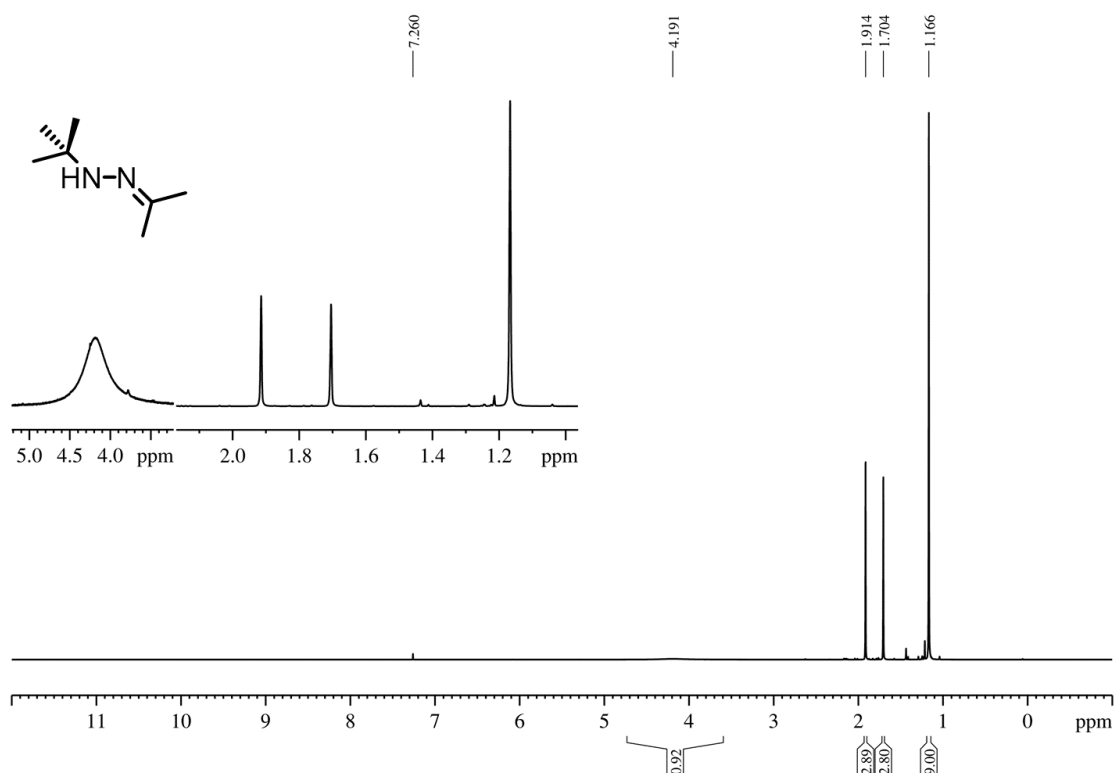

Figure S5.  $^1\text{H}$  NMR spectrum (CDCl<sub>3</sub>, 500 MHz) of *tert*-butyl hydrazone (**1**).

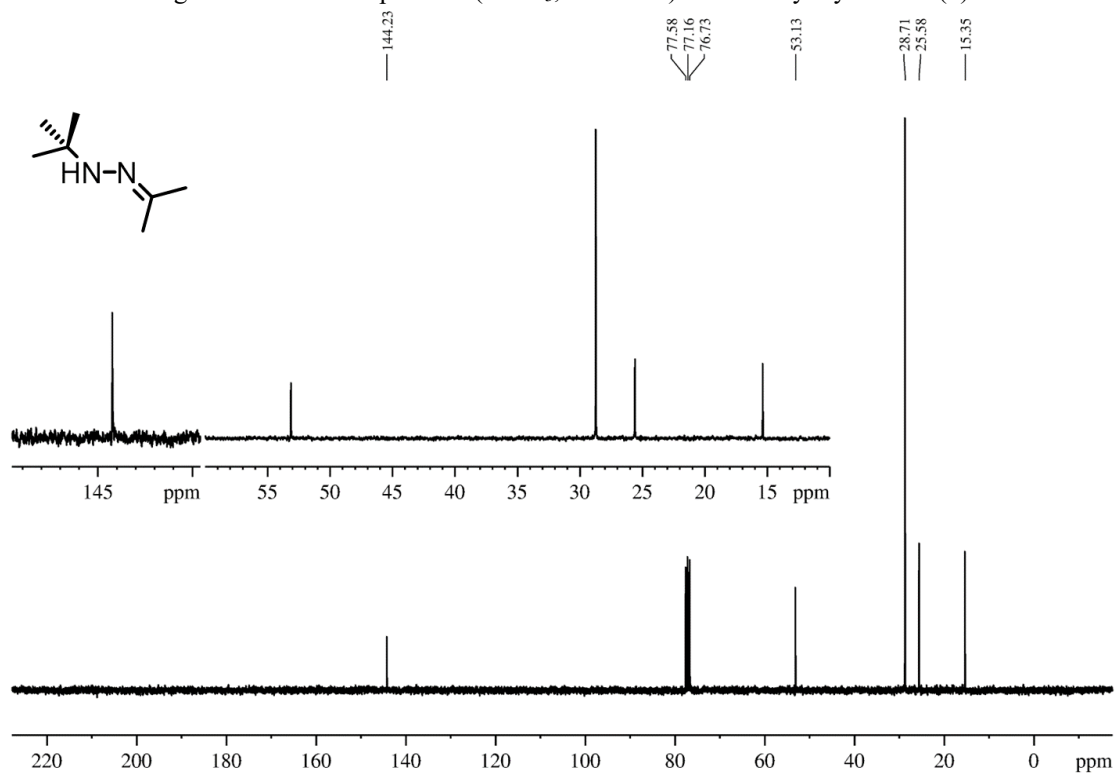

Figure S6.  $^{13}\text{C}\{^1\text{H}\}$  NMR spectrum (CDCl<sub>3</sub>, 75 MHz) of *tert*-butyl hydrazone (**1**).



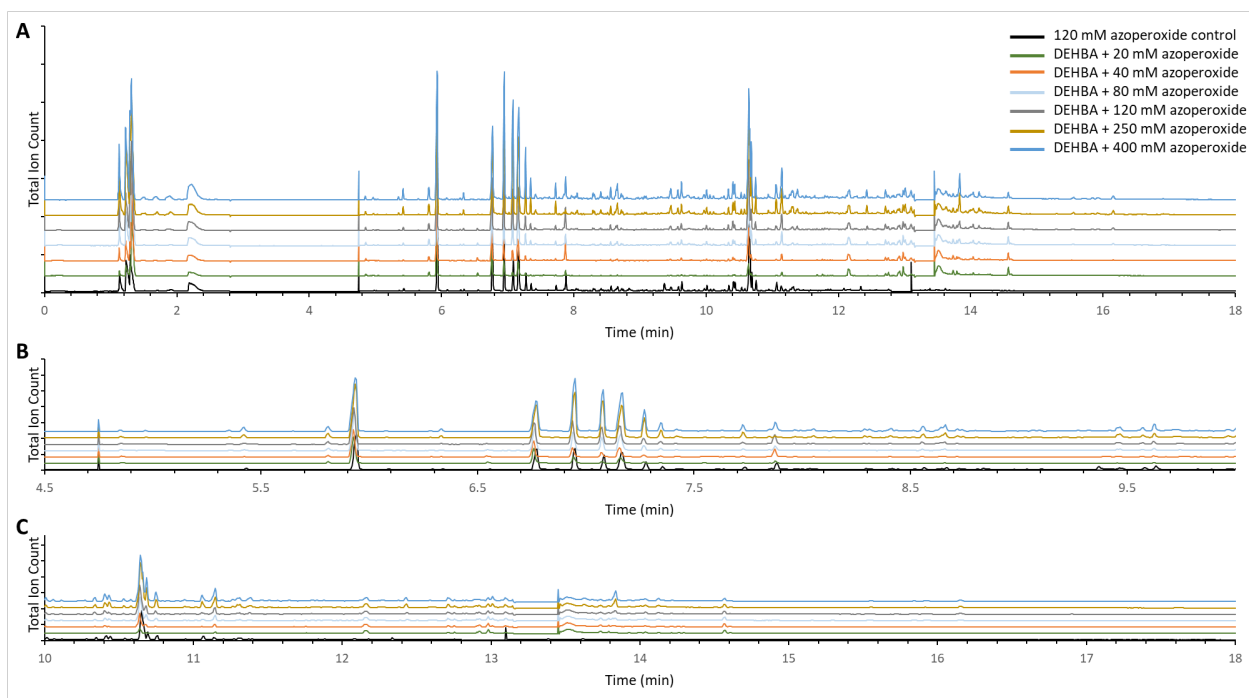

Figure S7. A) Full TICs for DEHBA treated with azoperoxide at the indicated concentrations and B and C) insets of the TICs in A.

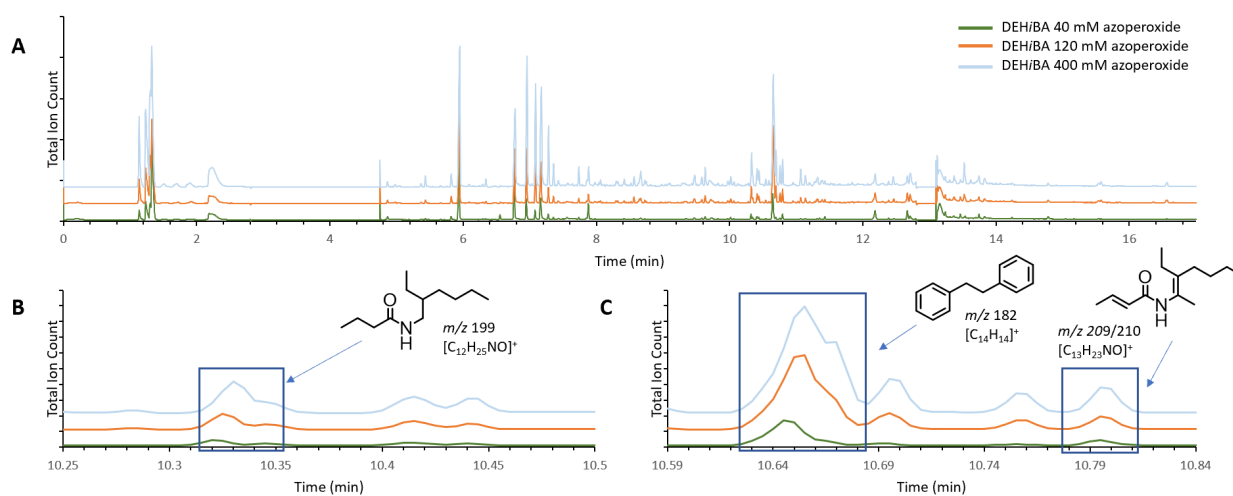

Figure S8. A) Full TICs for DEHiBA treated with azoperoxide at the indicated concentrations and B and C) insets of the TICs in A.

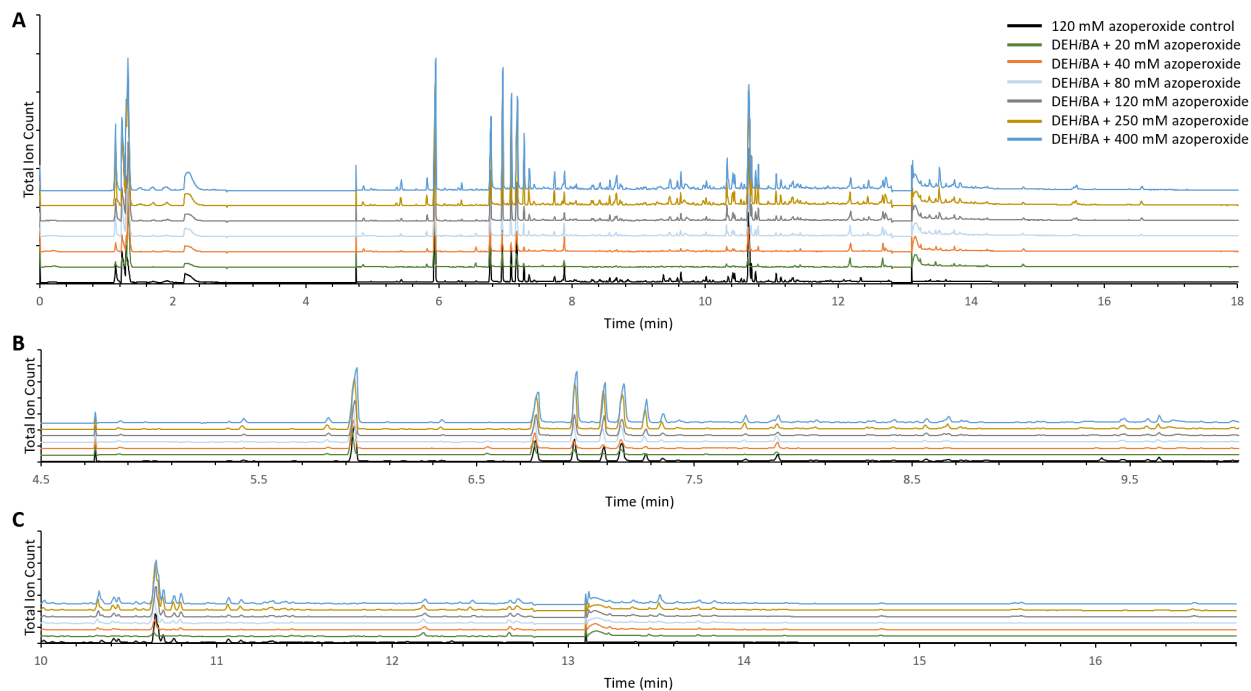

Figure S9. A) Full TICs for DEH/BA treated with azoperoxide at the indicated concentrations and B and C) insets of the TICs in A.

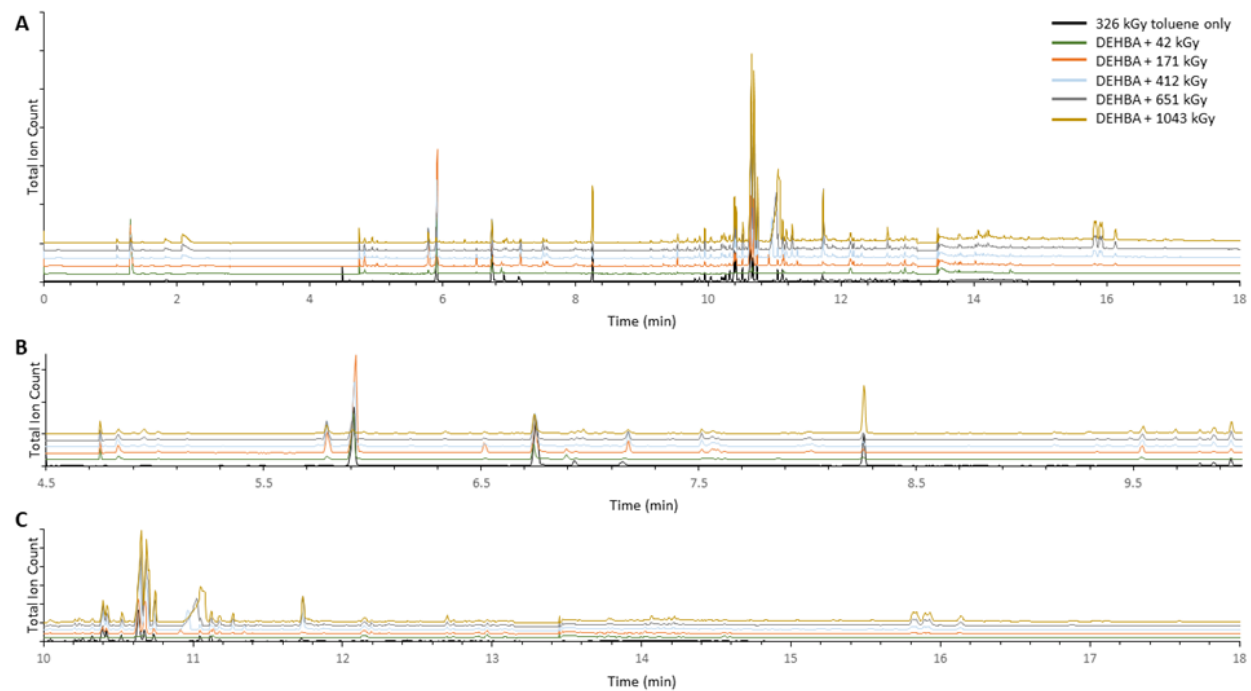

Figure S10. A) Full TICs for DEHBA irradiated at the indicated doses and B and C) insets of the TICs in A.

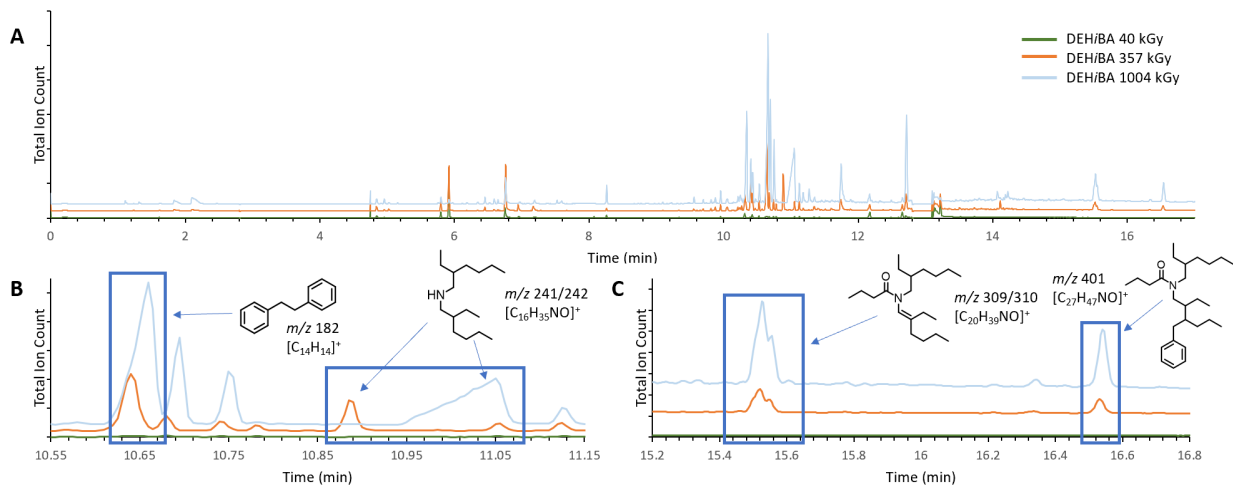

Figure S11. A) Full TICs for DEH/BA irradiated at the indicated doses and B and C) insets of the TICs in A.

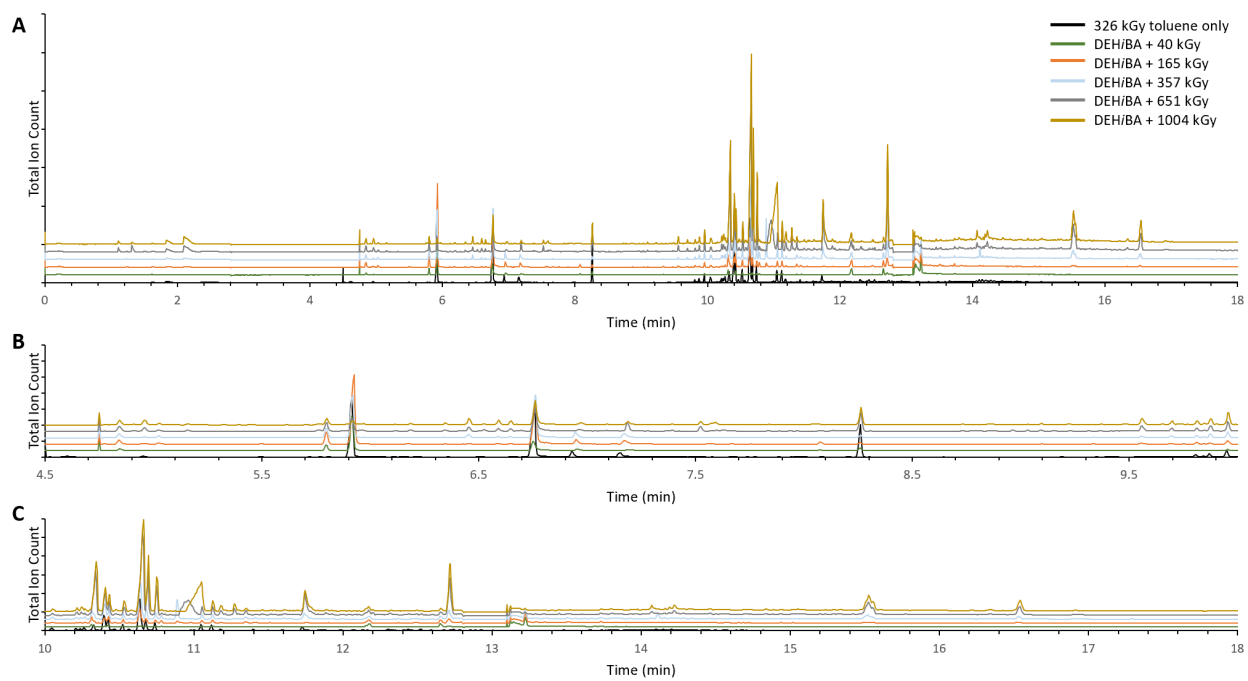

Figure S12. A) Full TICs for DEH/BA irradiated at the indicated doses and B and C) insets of the TICs in A.

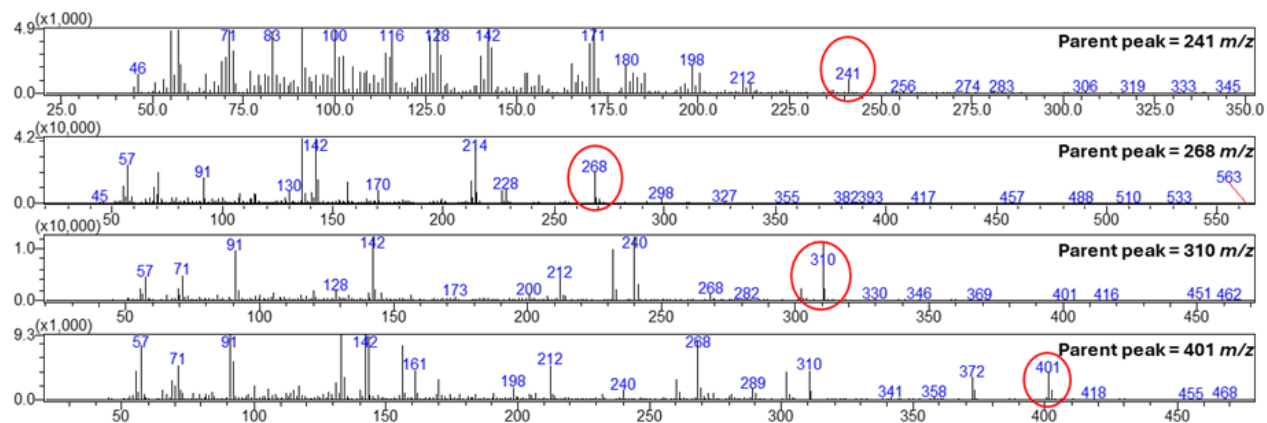

Figure S13. Selected mass spectra for DEHBA and DEH/BA degradation products formed in the radical assay. Similar mass spectra were observed for DEHBA and DEH/BA degradation products formed during gamma radiolysis.

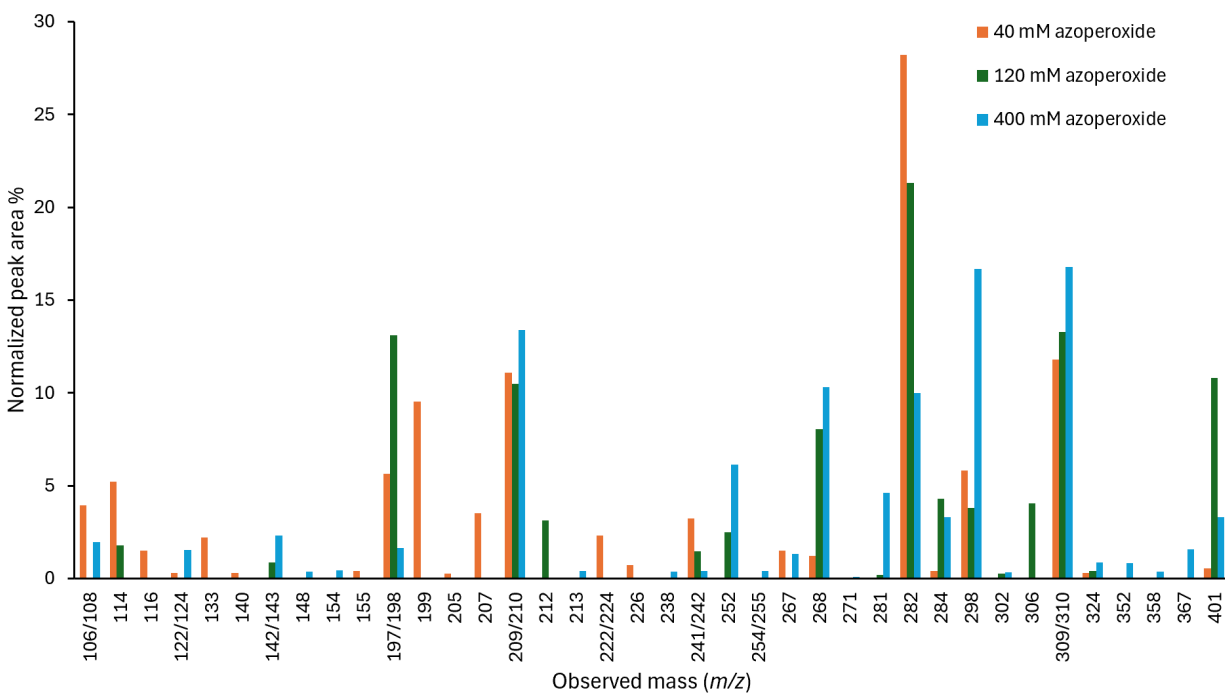

Figure S14. Normalized peak area percentages for all DEHBA degradation products upon treatment with 40 (orange), 120 (green), or 400 mM (blue) azoperoxide.

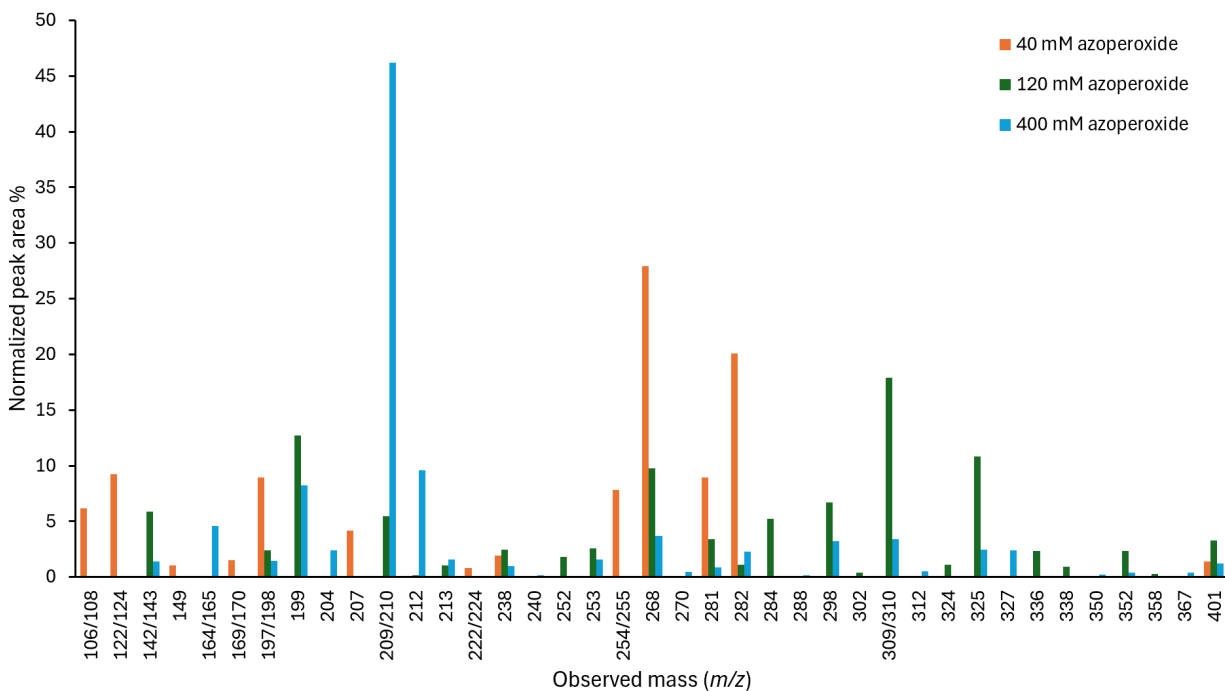

Figure S15. Normalized peak area percentages for all DEHBA degradation products upon treatment with 40 (orange), 120 mM (green), or 400 mM (blue) azoperoxide.

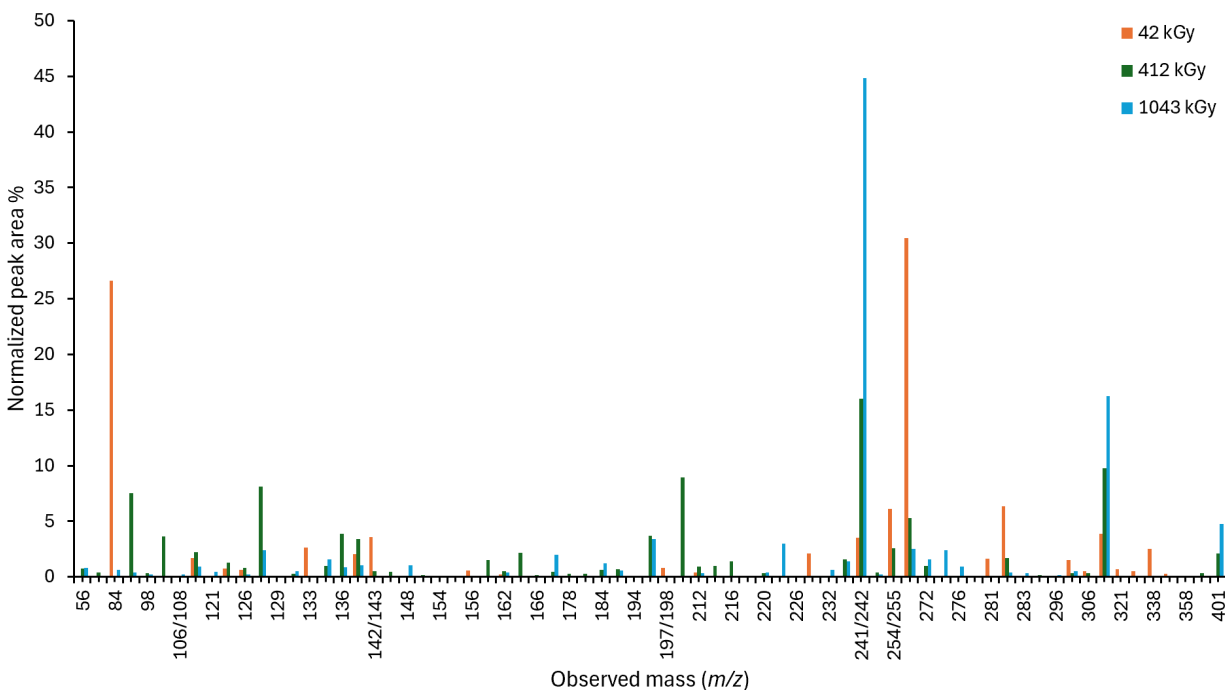

Figure S16. Normalized peak area percentages for all DEHBA degradation products upon treatment with 42 (orange), 412 (green), or 1043 kGy (blue) gamma radiation.

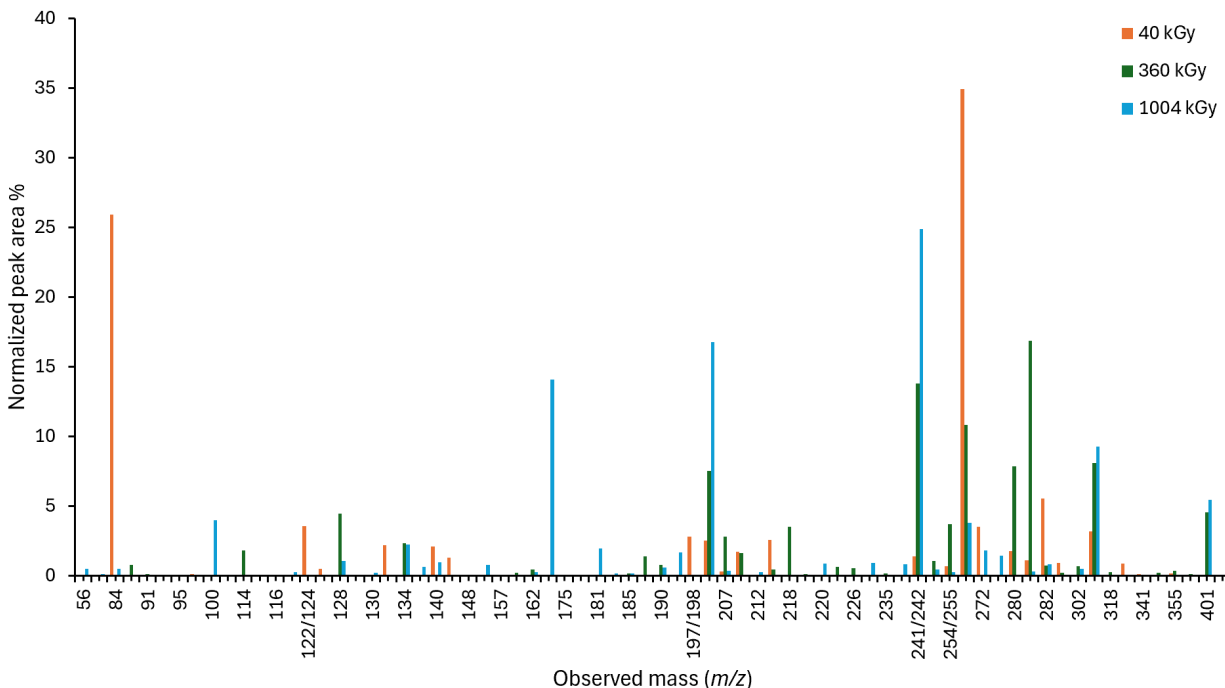

Figure S17. Normalized peak area percentages for all DEHiBA degradation products upon treatment with 40 (orange), 360 (green), or 1004 kGy (blue) gamma radiation.

**Context for radiolytic and radical assay comparisons.** The goal of this work is not to obtain exact correlations between gamma radiolytic and non-radiolytically generated radical degradation. Gamma radiolysis is *the* gold standard, but gamma irradiators are expensive, difficult to maintain (by replacing their radioactive sources), and are increasingly only available in national laboratories due to security concerns about radiological terrorism. A synthetic laboratory can produce dozens of compounds to be tested for various applications (antioxidants for astronaut food, radical scavengers to lengthen the lifetime of electronics components in spacecraft, radioprotectants to modulate side effects from Gamma Knife® cancer treatments, etc.), but testing dozens of compounds via gamma radiolysis would be slow and expensive. Therefore, there is a great need for a rapid, inexpensive protocol that can qualitatively or semi-quantitatively predict gamma irradiation results for use as a prescreen to narrow the pipeline.

Additionally, as we demonstrated using the bibenzyl internal standard, the damage that is done during the radical assay at its highest does is not as high as was achieved using gamma radiolysis. For example, in Figure 3C, 120 mM azoperoxide correlates to ~2.8 mM bibenzyl formation and 412 kGy correlates to ~5.2 mM bibenzyl formation. The graphs in Figure 3 and S18 show results for only the most formed monoamide degradation products; the following Table S1 contains additional information for all 58 compounds.

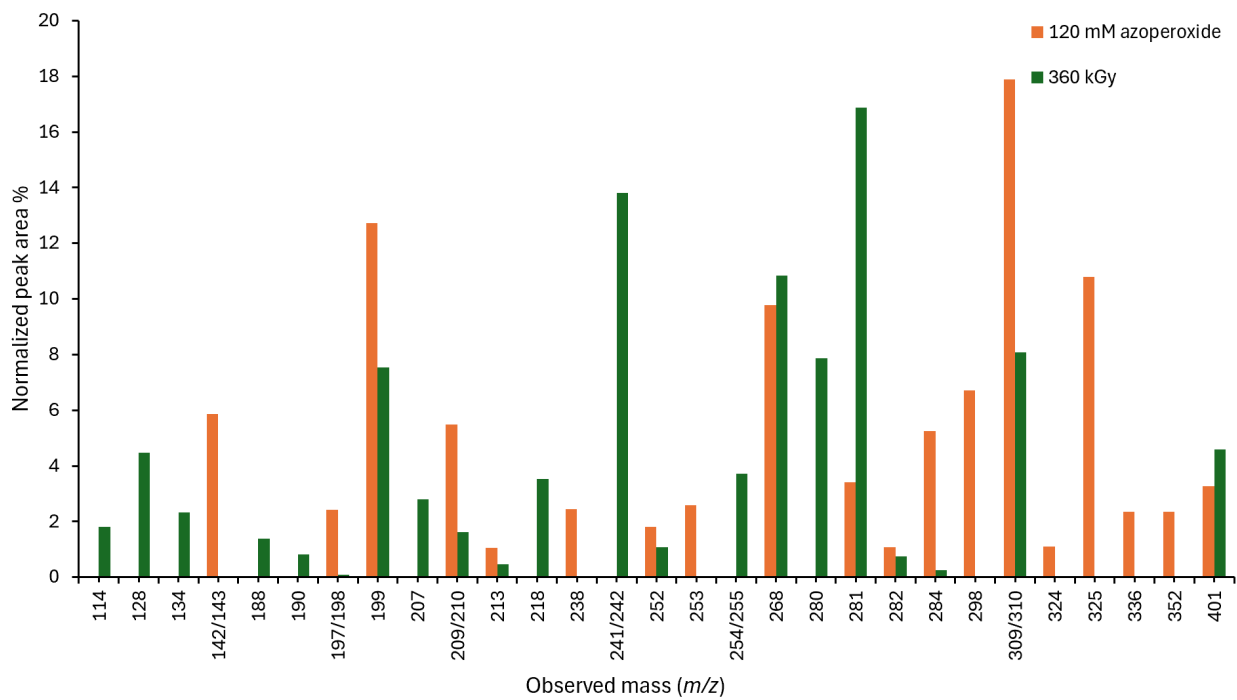

Figure S18. Graph comparing DEH/BA degradation products formed from treatment with 120 mM azoperoxide (orange) or 360 kGy gamma radiolysis (green) that have  $\geq 1\%$  normalized peak area percentages in either method.

Table S1. Percentages of DEHBA and DEHiBA degradation products with  $\geq 1\%$  normalized peak areas formed during gamma radiolysis or azoperoxide treatment at low (L), medium (M), and high (H) doses with corresponding possible structure (NA = not observed). \*Reported degradation product for both DEHBA and DEHiBA.<sup>8-10</sup> #Reported degradation product for DEHiBA only.<sup>8</sup> ##Reported as an unidentified degradation product for DEHiBA.<sup>8</sup> ‡Reported as unidentified degradation product for DEHBA.<sup>10</sup> Reported DEHiBA degradation products were formed under the following indicated conditions: c = contacted; o = organic only; b = both (for DEHBA, the reported degradation products were only done under contacted conditions)<sup>8-10</sup>; a = % product was determined by adding peaks with  $m/z$  values within  $\pm 1$  mass unit.

| Entry # | Observed $m/z$ value and empirical formula                 | Possible degradation product                                                        | % Product observed for DEHBA (radical assay/radiolysis) | % Product observed for DEHiBA (radical assay/radiolysis) | Retention times for DEHBA (radical assay/radiolysis)                                       | Retention times for DEHiBA (radical assay/radiolysis)                  |
|---------|------------------------------------------------------------|-------------------------------------------------------------------------------------|---------------------------------------------------------|----------------------------------------------------------|--------------------------------------------------------------------------------------------|------------------------------------------------------------------------|
| 1       | 84<br>[C <sub>4</sub> H <sub>5</sub> NO] <sup>+</sup>      | 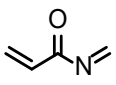   | L: 0/26.6<br>M: 0/0<br>H: 0/0.649                       | L: 0/25.9<br>M: 0/0<br>H: 0/0.488                        | L: NA/1.316<br>M: NA<br>H: NA/1.309                                                        | L: NA/1.315<br>M: NA<br>H: NA/1.313, 1.494                             |
| 2       | 86<br>[C <sub>4</sub> H <sub>7</sub> NO] <sup>+</sup>      |    | L: 0/0<br>M: 0/7.55<br>H: 0/0.374                       | L: 0/0<br>M: 0/0<br>H: 0/0                               | L: NA<br>M: NA/1.307<br>H: NA/1.476                                                        | NA                                                                     |
| 3       | 100<br>[C <sub>5</sub> H <sub>9</sub> NO] <sup>+</sup>     |    | L: 0/0<br>M: 0/3.67<br>H: 0/0                           | L: 0/0<br>M: 0/0<br>H: 0/4.02                            | L: NA<br>M: NA/2.094<br>H: NA                                                              | L: NA<br>M: NA<br>H: NA/2.101                                          |
| 4       | 106/108<br>[C <sub>7</sub> H <sub>9</sub> N] <sup>+</sup>  |    | L: 3.94/0<br>M: 0/0<br>H: 1.98/0.221                    | L: 6.20/0<br>M: 0/0<br>H: 0/0                            | L: 6.820/NA<br>M: NA/NA<br>H: 4.515/5.960                                                  | L: 6.827/NA<br>M: NA<br>H: NA                                          |
| 5       | 114<br>[C <sub>6</sub> H <sub>11</sub> NO] <sup>+</sup>    |  | L: 5.21/1.70<br>M: 1.79/2.21<br>H: 0/0.925              | L: 0/0<br>M: 0/1.81<br>H: 0/0                            | L: 4.865/4.858<br>M: 4.854/4.831<br>H: NA/4.834                                            | L: NA<br>M: NA/4.842<br>H: NA                                          |
| 6       | 116<br>[C <sub>6</sub> H <sub>13</sub> NO] <sup>+</sup>    |  | L: 1.51/0<br>M: 0/0<br>H: 0/0                           | L: 0/0<br>M: 0/0.076<br>H: 0/0                           | L: 7.558/NA<br>M: NA<br>H: NA                                                              | L: NA<br>M: NA/7.583<br>H: NA                                          |
| 7       | 122/124<br>[C <sub>7</sub> H <sub>9</sub> NO] <sup>+</sup> |  | L: 0.316/0<br>M: 0/1.29<br>H: 1.53/0                    | L: 9.25/3.58<br>M: 0/0<br>H: 0/0.04                      | L: 8.084/7.959<br>M: NA/8.024, 8.073<br>H: 9.704/NA                                        | L: 9.737/7.868, 7.954<br>M: NA<br>H: NA/8.044                          |
| 8       | 128<br>[C <sub>7</sub> H <sub>15</sub> NO] <sup>+</sup>    |  | L: 0/0<br>M: 0/8.12<br>H: 0/2.38                        | L: 0/0<br>M: 0/4.47<br>H: 0/1.09                         | L: NA<br>M: NA/5.316, 5.752, 5.794, 5.862, 5.95, 6.338<br>H: NA/5.751, 5.791, 6.016, 6.337 | L: NA<br>M: NA/5.798, 9.556<br>H: NA/5.755, 5.799                      |
| 9       | 133                                                        | Unidentified                                                                        | L: 2.22/2.64<br>M: 0/0<br>H: 0/0                        | L: 0/2.20<br>M: 0/0<br>H: 0/0                            | L: 8.571/6.910<br>M: NA<br>H: NA                                                           | L: NA/6.907<br>M: NA<br>H: NA                                          |
| 10      | 134<br>[C <sub>9</sub> H <sub>10</sub> O] <sup>+</sup>     |  | L: 0/0<br>M: 0/0.980<br>H: 0/1.57                       | L: 0/0<br>M: 0/2.32<br>H: 0/2.26                         | L: NA<br>M: NA/6.6, 6.896, 6.919, 6.939, 6.972, 7.07<br>H: NA/6.590, 6.916, 6.948,         | L: NA<br>M: NA/6.455, 6.590, 6.646<br>H: NA/6.456, 6.592, 6.649, 6.971 |



|                   |                                                                           |                                                                                     |                                             |                                                |                                                                                                        |                                                                                            |
|-------------------|---------------------------------------------------------------------------|-------------------------------------------------------------------------------------|---------------------------------------------|------------------------------------------------|--------------------------------------------------------------------------------------------------------|--------------------------------------------------------------------------------------------|
|                   |                                                                           |                                                                                     |                                             |                                                | 6.971, 7.069,<br>8.072                                                                                 |                                                                                            |
| 11                | 136<br>[C <sub>8</sub> H <sub>9</sub> NO] <sup>+</sup>                    | 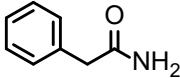   | L: 0/0<br>M: 0/3.86<br>H: 0/0.870           | L: 0/0<br>M: 0/0<br>H: 0/0.659                 | L: NA<br>M: NA/7.179<br>H: NA/7.178                                                                    | L: NA<br>M: NA<br>H: NA/6.526,<br>7.189                                                    |
| 12                | 140<br>[C <sub>8</sub> H <sub>13</sub> NO] <sup>+</sup>                   |    | L: 0.314/2.03<br>M: 0/3.38<br>H: 0/1.06     | L: 0/2.10<br>M: 0/0<br>H: 0/0.993              | L: 10.579/7.534,<br>7.578, 7.603<br>M: NA/7.516,<br>7.566, 7.62, 8.64<br>H: NA/7.517,<br>7.591, 12.194 | L: NA/7.530,<br>7.575, 7.600,<br>7.631<br>M: NA<br>H: NA/7.369,<br>7.524, 7.594,<br>12.199 |
| 13                | 142/143 <sup>a</sup><br>[C <sub>8</sub> H <sub>17</sub> NO] <sup>+</sup>  |    | L: 0/3.59<br>M: 0.882/0.511<br>H: 2.34/0    | L: 0/1.30<br>M: 5.85/0<br>H: 1.41/0.038        | L: NA/5.175,<br>7.424, 7.871<br>M: 6.820/5.014<br>H: 4.549, 4.874,<br>6.716/NA                         | L: NA/7.390,<br>7.421, 10.906<br>M: 9.720/NA<br>H: 5.836/8.065                             |
| 14                | 149<br>[C <sub>9</sub> H <sub>11</sub> NO] <sup>+</sup>                   |    | L: 0/0<br>M: 0/0<br>H: 0/0                  | L: 1.04/0<br>M: 0/0<br>H: 0/0                  | NA                                                                                                     | L: 9.586/NA<br>M: NA<br>H: NA                                                              |
| 15                | 157<br>[C <sub>9</sub> H <sub>19</sub> NO] <sup>+</sup>                   |   | L: 0/0<br>M: 0/1.52<br>H: 0/0               | L: 0/0<br>M: 0/0<br>H: 0/0.036                 | L: NA<br>M: NA/9.540<br>H: NA                                                                          | L: NA<br>M: NA<br>H: NA/7.839                                                              |
| 16                | 164/165 <sup>a</sup><br>[C <sub>10</sub> H <sub>15</sub> NO] <sup>+</sup> |  | L: 0/0<br>M: 0/2.14<br>H: 0/0               | L: 0/0<br>M: 0/0<br>H: 4.58/0                  | L: NA<br>M: NA/8.744,<br>12.192, 12.312<br>H: NA                                                       | L: NA<br>M: NA<br>H: 9.576/NA                                                              |
| 17                | 169/170 <sup>a</sup><br>[C <sub>10</sub> H <sub>19</sub> NO] <sup>+</sup> |  | L: 0/0<br>M: 0/0.441<br>H: 0/1.98           | L: 1.51/0<br>M: 0/0<br>H: 0/14.1               | L: NA<br>M: NA/9.332<br>H: NA/12.701                                                                   | L: 10.846/NA<br>M: NA<br>H: NA/9.225,<br>12.717                                            |
| 18                | 181<br>[C <sub>11</sub> H <sub>19</sub> NO] <sup>+</sup>                  |  | L: 0/0<br>M: 0/0<br>H: 0/0                  | L: 0/0<br>M: 0/0<br>H: 0/1.98                  | NA                                                                                                     | L: NA<br>M: NA<br>H: NA/14.220                                                             |
| 19                | 184<br>[C <sub>11</sub> H <sub>21</sub> NO] <sup>+</sup>                  |  | L: 0/0<br>M: 0/0.615<br>H: 0/1.23           | L: 0/0<br>M: 0/0<br>H: 0/0.180                 | L: NA<br>M: NA/9.606,<br>12.742<br>H: NA/9.545                                                         | L: NA<br>M: NA<br>H: NA/10.780                                                             |
| 20                | 188<br>[C <sub>12</sub> H <sub>13</sub> NO] <sup>+</sup>                  |  | L: 0/0<br>M: 0/0<br>H: 0/0                  | L: 0/0<br>M: 0/1.38<br>H: 0/0                  | NA                                                                                                     | L: NA<br>M: NA/11.350<br>H: NA                                                             |
| 21                | 196<br>[C <sub>12</sub> H <sub>21</sub> NO] <sup>+</sup>                  |  | L: 0/0<br>M: 0/3.70<br>H: 0/3.40            | L: 0/0<br>M: 0/0<br>H: 0/1.67                  | L: NA<br>M: NA/11.176,<br>11.264, 11.450<br>H: NA/11.121                                               | L: NA<br>M: NA<br>H: NA/11.208,<br>11.350, 11.459                                          |
| 22 <sup>#,b</sup> | 197/198 <sup>a</sup><br>[C <sub>12</sub> H <sub>23</sub> NO] <sup>+</sup> |  | L: 5.64/ 0.805<br>M: 13.1/8.94<br>H: 1.65/0 | L: 8.97/2.80<br>M: 2.41/0.093<br>H: 1.43/0.044 | L: 11.679,<br>11.759,<br>12.445/11.629                                                                 | L:<br>12.471/11.339,<br>11.417                                                             |

|       |                                                                        |                                                                                     |                                           |                                           |                                                                                          |                                                                                    |
|-------|------------------------------------------------------------------------|-------------------------------------------------------------------------------------|-------------------------------------------|-------------------------------------------|------------------------------------------------------------------------------------------|------------------------------------------------------------------------------------|
|       |                                                                        |                                                                                     |                                           |                                           | M: 11.755,<br>12.435,<br>12.600/10.874,<br>11.731, 12.245<br>H: 12.290/NA                | M:<br>12.509/11.820<br>H: 11.933/8.973                                             |
| 23*.b | 199<br>[C <sub>12</sub> H <sub>25</sub> NO] <sup>+</sup>               | 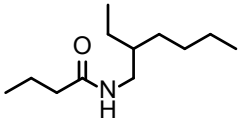   | L: 9.53/0<br>M: 0/0<br>H: 0/0             | L: 0/2.55<br>M: 12.7/7.55<br>H: 8.25/16.8 | L: 10.679/NA<br>M: NA<br>H: NA                                                           | L: NA/10.310<br>M: 10.326,<br>12.462/10.320<br>H:<br>10.344/10.340                 |
| 24    | 204<br>[C <sub>12</sub> H <sub>15</sub> NO <sub>2</sub> ] <sup>+</sup> |    | L: 0/0<br>M: 0/0<br>H: 0/0                | L: 0/0<br>M: 0/0<br>H: 2.40/0             | NA                                                                                       | L: NA<br>M: NA<br>H: 9.736/NA                                                      |
| 25    | 207<br>[C <sub>13</sub> H <sub>21</sub> NO] <sup>+</sup>               |    | L: 3.51/0<br>M: 0/0<br>H: 0/0             | L: 4.16/0.311<br>M: 0/2.81<br>H: 0/0.343  | L: 8.032, 9.077,<br>9.142, 9.279,<br>10.225, 11.295,<br>11.644/NA<br>M: NA<br>H: NA      | L: 5.668, 8.579,<br>11.815/5.175<br>M: NA/2.099,<br>7.936<br>H: NA/5.027,<br>5.159 |
| 26    | 209/210<br>[C <sub>13</sub> H <sub>23</sub> NO] <sup>+</sup>           |    | L: 11.1/0<br>M: 10.5/0<br>H: 13.4/0       | L: 0/1.71<br>M: 5.49/ 1.61<br>H: 46.2/0   | L: 11.146/NA<br>M: 11.143/NA<br>H: 11.165/NA                                             | L: NA/13.403<br>M:<br>10.796/10.780<br>H: 10.810/NA                                |
| 27    | 212<br>[C <sub>13</sub> H <sub>25</sub> NO] <sup>+</sup>               |   | L: 0/0.382<br>M: 3.13/0.937<br>H: 0/0.322 | L: 0/0<br>M: 0.156/0<br>H: 9.61/0.287     | L: NA/5.042,<br>5.225<br>M:<br>9.739/11.875,<br>14.928, 14.979<br>H: NA/9.487,<br>11.896 | L: NA<br>M: 6.826/NA<br>H: 6.845,<br>8.971/11.520                                  |
| 28    | 213<br>[C <sub>13</sub> H <sub>27</sub> NO] <sup>+</sup>               |  | L: 0/0<br>M: 0/0.981<br>H: 0.413/0        | L: 0/2.57<br>M: 1.06/0.471<br>H: 1.59/0   | L: NA<br>M: NA/11.134<br>H: 10.906/NA                                                    | L: NA/10.786,<br>10.830<br>M: 10.500/1.231<br>H: 10.515/NA                         |
| 29    | 216<br>[C <sub>15</sub> H <sub>21</sub> N] <sup>+</sup>                |  | L: 0/0<br>M: 0/1.41<br>H: 0/0             | L: 0/0<br>M: 0/0<br>H: 0/0                | L: NA<br>M: NA/11.344<br>H: NA                                                           | NA                                                                                 |
| 30    | 218<br>[C <sub>15</sub> H <sub>23</sub> N] <sup>+</sup>                |  | L: 0/0<br>M: 0/0.067<br>H: 0/0            | L: 0/0<br>M: 0/3.54<br>H: 0/0             | L: NA<br>M: NA/11.913<br>H: NA                                                           | L: NA<br>M: NA/14.110<br>H: NA                                                     |
| 31    | 222/224<br>[C <sub>15</sub> H <sub>29</sub> N] <sup>+</sup>            |  | L: 2.31/0<br>M: 0/0<br>H: 0/3.01          | L: 0.815/0<br>M: 0/0<br>H: 0/0            | L: 11.798/NA<br>M: NA/NA<br>H: NA/11.267,<br>11.346, 11.453,<br>11.694                   | L: 11.3/NA<br>M: NA/11.400<br>H: NA                                                |
| 32    | 229                                                                    | Unidentified                                                                        | L: 0/2.10<br>M: 0/0<br>H: 0/0             | L: 0/0<br>M: 0/0<br>H: 0/0                | L: NA/12.707<br>M: NA<br>H: NA                                                           | NA                                                                                 |

|                            |                                                                          |        |                                                |                                            |                                                                                          |                                                                                   |
|----------------------------|--------------------------------------------------------------------------|--------|------------------------------------------------|--------------------------------------------|------------------------------------------------------------------------------------------|-----------------------------------------------------------------------------------|
| 33                         | 238<br>[C <sub>16</sub> H <sub>31</sub> N] <sup>+</sup>                  |        | L: 0/0<br>M: 0/0<br>H: 0.383/0                 | L: 1.94/0<br>M: 2.44/0<br>H: 1.01/0        | L: NA<br>M: NA<br>H: 12.395/NA                                                           | L: 11.784/NA<br>M: 11.781/NA<br>H: 12.452/NA                                      |
| 34 <sup>*,b</sup>          | 240<br>[C <sub>16</sub> H <sub>33</sub> N] <sup>+</sup>                  |        | L: 0/0<br>M: 0/1.60<br>H: 0/1.42               | L: 0/0<br>M: 0/0<br>H: 0.180/0.826         | L: NA<br>M: NA/12.699,<br>15.198<br>H: NA/13.781                                         | L: NA<br>M: NA<br>H:<br>12.521/13.800,<br>15.023                                  |
| 35 <sup>*,b</sup>          | 241/242 <sup>a</sup><br>[C <sub>16</sub> H <sub>35</sub> N] <sup>+</sup> |        | L: 3.23/3.50<br>M: 1.46/16.0<br>H: 0.423/ 44.8 | L: 0/1.39<br>M: 0/13.8<br>H: 0/24.9        | L: 12.815,<br>12.838/10.880,<br>11.674, 12.531<br>M:<br>11.675/10.966<br>H: 5.059/11.052 | L: NA/12.532<br>M: NA/10.890<br>H: NA/11.050                                      |
| 36                         | 252<br>[C <sub>17</sub> H <sub>33</sub> N] <sup>+</sup>                  |        | L: 0/0<br>M: 2.51/0.413<br>H: 6.13/ 0.203      | L: 0/0<br>M: 1.80/1.07<br>H: 0.090/ 0.455  | L: NA<br>M:<br>12.630/12.028,<br>12.105, 12.496<br>H: 12.438,<br>12.892/12.498           | L: NA<br>M:<br>12.415/11.886,<br>12.471, 12.489<br>H:<br>12.504/11.886,<br>11.924 |
| 37 <sup>*,c</sup><br>(top) | 253<br>[C <sub>17</sub> H <sub>35</sub> N] <sup>+</sup>                  | OR<br> | L: 0/0<br>M: 0/0<br>H: 0/0                     | L: 0/0<br>M: 2.58/0<br>H: 1.57/0           | NA                                                                                       | L: NA<br>M: 11.432/NA<br>H: 11.446/NA                                             |
| 38 <sup>*,o</sup><br>(top) | 254/255<br>[C <sub>16</sub> H <sub>33</sub> NO] <sup>+</sup>             | OR<br> | L: 0/6.128<br>M: 0/2.58<br>H: 0.403/0          | L: 7.824/ 0.699<br>M: 0/3.71<br>H: 0/0.271 | L: NA/12.148<br>M: NA/12.147<br>H: 12.602/NA                                             | L:<br>12.506/12.115<br>M: NA/12.170<br>H: NA/12.490                               |
| 39                         | 267<br>[C <sub>17</sub> H <sub>33</sub> NO] <sup>+</sup>                 |        | L: 1.51/0<br>M: 0/0<br>H: 1.34/0               | L: 0/0<br>M: 0/0<br>H: 0/0                 | L: 12.123/NA<br>M: NA<br>H: 12.142/NA                                                    | NA                                                                                |

|    |                                                          |                                                                                     |                                                |                                                 |                                                                                                                                                                                                                                                                     |                                                                                                                                                                                                                                                                                                                                                                                                  |
|----|----------------------------------------------------------|-------------------------------------------------------------------------------------|------------------------------------------------|-------------------------------------------------|---------------------------------------------------------------------------------------------------------------------------------------------------------------------------------------------------------------------------------------------------------------------|--------------------------------------------------------------------------------------------------------------------------------------------------------------------------------------------------------------------------------------------------------------------------------------------------------------------------------------------------------------------------------------------------|
| 40 | 268<br>[C <sub>17</sub> H <sub>35</sub> NO] <sup>+</sup> | 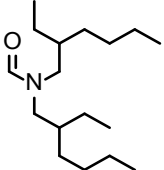   | L: 1.21/ 30.5<br>M: 8.07/5.29<br>H: 10.3/ 2.50 | L: 27.9/34.9<br>M: 9.77/ 10.9<br>H: 3.72/ 3.81  | L: 14.010/0.210,<br>7.393, 12.919,<br>12.978, 13.511,<br>13.786<br>M: 5.039, 6.987,<br>7.548,<br>13.629/0.094,<br>0.232, 4.899,<br>4.95, 12.844,<br>12.91, 12.966,<br>13.776, 13.968,<br>14.214<br>H:<br>13.649/0.089,<br>0.220, 4.900,<br>5.016, 12.894,<br>12.969 | L: 13.537,<br>13.621/<br>4.858, 4.927,<br>9.536, 12.23,<br>12.661, 13.151,<br>13.228, 13.458,<br>14.226<br>M: 5.049, 7.564,<br>11.934,<br>12.296/0.061,<br>0.208, 12.654,<br>13.222, 13.288,<br>13.355, 13.433,<br>13.505, 13.559,<br>13.621, 13.801,<br>16.214<br>H: 4.925, 5.062,<br>6.717, 9.252,<br>13.404,<br>14.188/0.064,<br>0.215, 4.844,<br>4.910, 12.527,<br>13.165, 13.221,<br>13.452 |
| 41 | 272<br>[C <sub>18</sub> H <sub>25</sub> NO] <sup>+</sup> |   | L: 0/0<br>M: 0/0.963<br>H: 0/1.57              | L: 0/3.54<br>M: 0/0<br>H: 0/1.84                | L: NA<br>M: NA/14.065,<br>14.108, 15.323<br>H: NA/12.027,<br>12.249, 12.849,<br>14.067                                                                                                                                                                              | L: NA/12.000,<br>12.753<br>M: NA<br>H: NA/14.070,<br>14.738, 14.837                                                                                                                                                                                                                                                                                                                              |
| 42 | 275<br>[C <sub>18</sub> H <sub>29</sub> NO] <sup>+</sup> |  | L: 0/0<br>M: 0/0<br>H: 0/2.41                  | L: 0/0<br>M: 0/0<br>H: 0/1.45                   | L: NA<br>M: NA<br>H: NA/11.537,<br>12.105, 12.147                                                                                                                                                                                                                   | L: NA<br>M: NA<br>H: NA/12.171,<br>13.402                                                                                                                                                                                                                                                                                                                                                        |
| 43 | 280<br>[C <sub>19</sub> H <sub>21</sub> NO] <sup>+</sup> |  | L: 0/0<br>M: 0/0.083<br>H: 0/0.125             | L: 0/1.76<br>M: 0/7.87<br>H: 0/0                | L: NA<br>M: NA/13.011<br>H: NA/13.000                                                                                                                                                                                                                               | L: NA/12.711<br>M: NA/12.710<br>H: NA                                                                                                                                                                                                                                                                                                                                                            |
| 44 | 281<br>[C <sub>19</sub> H <sub>23</sub> NO] <sup>+</sup> |  | L: 0/1.65<br>M:<br>0.201/0.056<br>H: 4.63/0    | L: 8.92/1.14<br>M: 3.40/16.9<br>H: 0.868/ 0.319 | L: NA/5.812<br>M: 6.690/6.109<br>H: 12.732/NA                                                                                                                                                                                                                       | L: 12.385/5.811<br>M:<br>12.385/5.917,<br>5.97, 6.345<br>H: 12.302,<br>12.371/5.970,<br>6.115                                                                                                                                                                                                                                                                                                    |

|                    |                                                                           |                                                                                     |                                                     |                                                 |                                                                                                                                                                                                                                                                                                     |                                                                                                                                                                              |
|--------------------|---------------------------------------------------------------------------|-------------------------------------------------------------------------------------|-----------------------------------------------------|-------------------------------------------------|-----------------------------------------------------------------------------------------------------------------------------------------------------------------------------------------------------------------------------------------------------------------------------------------------------|------------------------------------------------------------------------------------------------------------------------------------------------------------------------------|
| 45                 | 282<br>[C <sub>19</sub> H <sub>25</sub> NO] <sup>+</sup>                  | 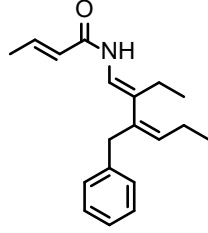   | L: 28.2/6.35<br>M: 21.3/1.67<br>H: 10.0/ 0.417      | L: 20.1/5.56<br>M: 1.08/0.748<br>H: 2.28/ 0.830 | L: 13.605,<br>13.681, 13.820,<br>14.040,<br>14.211/13.098,<br>14.035<br>M: 13.096,<br>13.680, 13.820,<br>14.036/13.084,<br>13.804, 14.025<br>H: 13.116,<br>13.697/13.086,<br>14.027                                                                                                                 | L: 13.700,<br>13.915/13.292,<br>13.525, 13.735<br>M:<br>13.914/13.730<br>H:<br>13.386/13.354,<br>13.525, 13.733                                                              |
| 46 <sup>##,c</sup> | 284<br>[C <sub>19</sub> H <sub>27</sub> NO] <sup>+</sup>                  |    | L: 0.418/0<br>M: 4.32/0<br>H: 3.32/0                | L: 0/0.948<br>M: 5.25/0.244<br>H: 0/0           | L: 14.131/NA<br>M: 14.123/NA<br>H: 14.145/NA                                                                                                                                                                                                                                                        | L: NA/13.903<br>M:<br>13.831/13.830<br>H: NA                                                                                                                                 |
| 47 <sup>##,b</sup> | 298<br>[C <sub>19</sub> H <sub>39</sub> NO] <sup>+</sup>                  |    | L: 5.82/0<br>M: 3.82/0<br>H: 16.7/0                 | L: 0/0<br>M: 6.70/0<br>H: 3.23/0                | L: 13.837/NA<br>M: 13.834/NA<br>H: 13.857,<br>14.056/NA                                                                                                                                                                                                                                             | L: NA<br>M: 13.521/NA<br>H: 13.535/NA                                                                                                                                        |
| 48                 | 302<br>[C <sub>20</sub> H <sub>31</sub> NO] <sup>+</sup>                  |   | L: 0/1.53<br>M:<br>0.270/0.339<br>H:<br>0.343/0.528 | L: 0/0<br>M: 0.369/0.699<br>H: 0/0.510          | L: NA/14.167<br>M:<br>15.294/17.010<br>H:<br>15.326/15.042,<br>15.283                                                                                                                                                                                                                               | L: NA<br>M:<br>15.628/14.876,<br>14.936, 15.772<br>H: NA/14.887,<br>14.940, 15.051,<br>15.091, 15.238                                                                        |
| 49                 | 306<br>[C <sub>20</sub> H <sub>35</sub> NO] <sup>+</sup>                  |  | L: 0/0.538<br>M: 4.07/0.349<br>H: 0/0               | L: 0/0<br>M: 0/0<br>H: 0/0                      | L: NA/14.291<br>M:<br>14.004/14.279<br>H: NA                                                                                                                                                                                                                                                        | NA                                                                                                                                                                           |
| 50 <sup>*.b</sup>  | 309/310 <sup>a</sup><br>[C <sub>20</sub> H <sub>39</sub> NO] <sup>+</sup> |  | L: 11.8/3.87<br>M: 13.3/9.78<br>H: 16.8/ 16.2       | L: 0/0.177<br>M: 17.9/8.09<br>H: 3.40/9.30      | L: 13.011,<br>13.990/13.733,1<br>4.566<br>M: 13.008,<br>13.927, 14.210,<br>15.833, 15.850,<br>15.937/13.056,<br>13.722, 13.890,<br>14.553, 14.875,<br>15.616, 15.699,<br>15.829, 15.891,<br>16.231, 16.421,<br>16.546, 18.491<br>H: 13.029,<br>13.085, 13.945,<br>14.024, 15.881,<br>15.948/13.100, | L: NA/13.346,<br>13.820<br>M: 12.711,<br>13.710, 13.744,<br>13.970, 14.115,<br>15.541/15.520<br>H: 12.726,<br>13.928, 13.951,<br>13.985,<br>15.600/15.293,<br>15.334, 15.527 |

|                |                                                                        |                                                                                         |                                        |                                   |                                                         |                                                             |
|----------------|------------------------------------------------------------------------|-----------------------------------------------------------------------------------------|----------------------------------------|-----------------------------------|---------------------------------------------------------|-------------------------------------------------------------|
|                |                                                                        |                                                                                         |                                        |                                   | 14.883, 15.330,<br>15.838, 15.929                       |                                                             |
| 51             | 324<br>[C <sub>20</sub> H <sub>37</sub> NO <sub>2</sub> ] <sup>+</sup> | 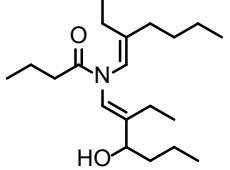       | L: 0.314/0<br>M: 0.428/0<br>H: 0.857/0 | L: 0/0<br>M: 1.09/0<br>H: 0/0     | L: 14.512/NA<br>M: 14.500/NA<br>H: 14.241,<br>14.371/NA | L: NA<br>M: 13.935/NA<br>H: NA                              |
| 52*.b<br>(top) | 325<br>[C <sub>20</sub> H <sub>39</sub> NO <sub>2</sub> ] <sup>+</sup> | OR<br> | L: 0/0<br>M: 0/0<br>H: 0/0             | L: 0/0<br>M: 10.8/0<br>H: 2.47/0  | NA                                                      | L: NA<br>M: 13.304,<br>13.371/NA<br>H: 13.318,<br>13.759/NA |
| 53*.b          | 327<br>[C <sub>20</sub> H <sub>41</sub> NO <sub>2</sub> ] <sup>+</sup> |        | L: 0/0<br>M: 0/0<br>H: 0/0             | L: 0/0<br>M: 0/0<br>H: 2.40/0     | NA                                                      | L: NA<br>M: NA<br>H: 13.726,<br>13.845/NA                   |
| 54             | 336<br>[C <sub>20</sub> H <sub>33</sub> NO <sub>3</sub> ] <sup>+</sup> |       | L: 0/0<br>M: 0/0<br>H: 0/0             | L: 0/0<br>M: 2.34/0<br>H: 0/0     | NA                                                      | L: NA<br>M: 14.063/NA<br>H: NA                              |
| 55             | 338<br>[C <sub>23</sub> H <sub>31</sub> NO] <sup>+</sup>               |      | L: 0/2.50<br>M: 0/0<br>H: 0/0          | L: 0/0<br>M: 0.942/0<br>H: 0/0    | L: NA/12.751<br>M: NA<br>H: NA                          | L: NA<br>M: 15.169/NA<br>H: NA                              |
| 56             | 352<br>[C <sub>23</sub> H <sub>29</sub> NO <sub>2</sub> ] <sup>+</sup> |      | L: 0/0<br>M: 0/0<br>H: 0.847/0         | L: 0/0<br>M: 2.35/0<br>H: 0.379/0 | L: NA<br>M: NA<br>H: 14.342,<br>14.459,<br>14.531/NA    | L: NA<br>M: 14.002,<br>14.205/NA<br>H: 13.905,<br>14.221/NA |

|                   |                                                                        |                                                                                   |                                             |                                         |                                                                                                                                                                                 |                                                                                                                                                                                                   |
|-------------------|------------------------------------------------------------------------|-----------------------------------------------------------------------------------|---------------------------------------------|-----------------------------------------|---------------------------------------------------------------------------------------------------------------------------------------------------------------------------------|---------------------------------------------------------------------------------------------------------------------------------------------------------------------------------------------------|
| 57 <sup>‡</sup>   | 367<br>[C <sub>24</sub> H <sub>33</sub> NO <sub>2</sub> ] <sup>+</sup> | 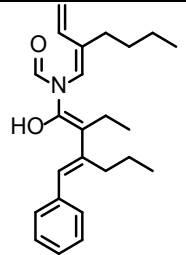 | L: 0/0<br>M: 0/0<br>H: 1.59/0               | L: 0/0<br>M: 0/0<br>H: 0.409/0          | L: NA<br>M: NA<br>H: 13.995/NA                                                                                                                                                  | L: NA<br>M: NA<br>H: 14.016/NA                                                                                                                                                                    |
| 58 <sup>*,b</sup> | 401<br>[C <sub>27</sub> H <sub>47</sub> NO] <sup>+</sup>               |  | L: 0.552/0<br>M: 10.8/2.09<br>H: 3.31/ 4.77 | L:1.41/0<br>M:3.27/4.58<br>H: 1.23/5.48 | L: 16.153/NA<br>M: 15.551,<br>15.725, 15.915,<br>16.151,<br>16.901/16.130,<br>16.877<br>H: 15.586,<br>15.764,<br>16.189/15.710,<br>16.138, 16.884,<br>17.023, 17.112,<br>17.596 | L: 16.558/NA<br>M: 15.577,<br>15.858,<br>16.561/16.333,<br>16.42, 16.532,<br>16.906, 16.95,<br>17, 17.296<br>H: 15.562,<br>15.880, 16.389,<br>16.589/15.778,<br>16.217, 16.341,<br>16.541, 16.909 |

Table S2. The percent relative standard deviations for triplicate TICs of each azoperoxide or  $\gamma$ -radiation dose with DEHBA.

| Azoperoxide (mM) or Radiolysis Dose (kGy) | Relative Standard Deviation (RSD) |
|-------------------------------------------|-----------------------------------|
| 40 mM azoperoxide                         | 2.54 $\pm$ 2.65                   |
| 120 mM azoperoxide                        | 3.31 $\pm$ 2.89                   |
| 400 mM azoperoxide                        | 4.86 $\pm$ 3.33                   |
| 42 kGy                                    | N/A (only 2 samples)              |
| 171 kGy                                   | 3.43 $\pm$ 3.02                   |
| 412 kGy                                   | N/A (only 2 samples)              |
| 651 kGy                                   | 3.56 $\pm$ 3.56                   |
| 1043 kGy                                  | 5.03 $\pm$ 6.99                   |

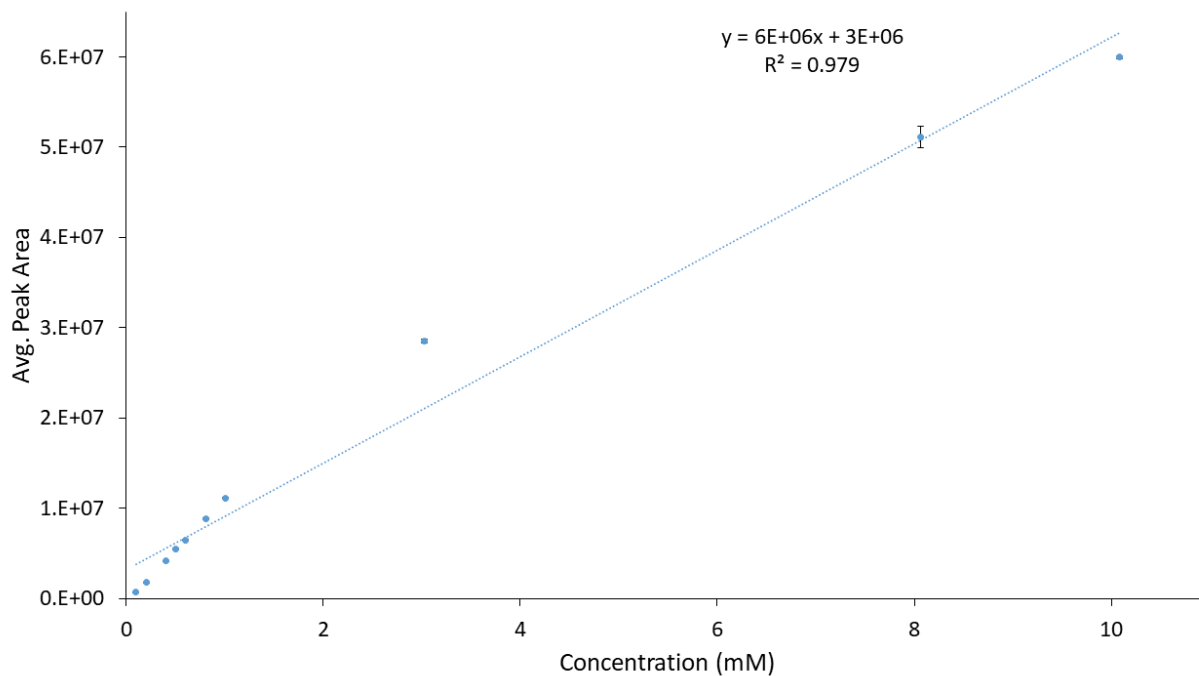

Figure S19. Calibration curve of DEHBA in toluene (0.1 to 10 mM). Instrument response was non-linear above 1 mM DEHBA.

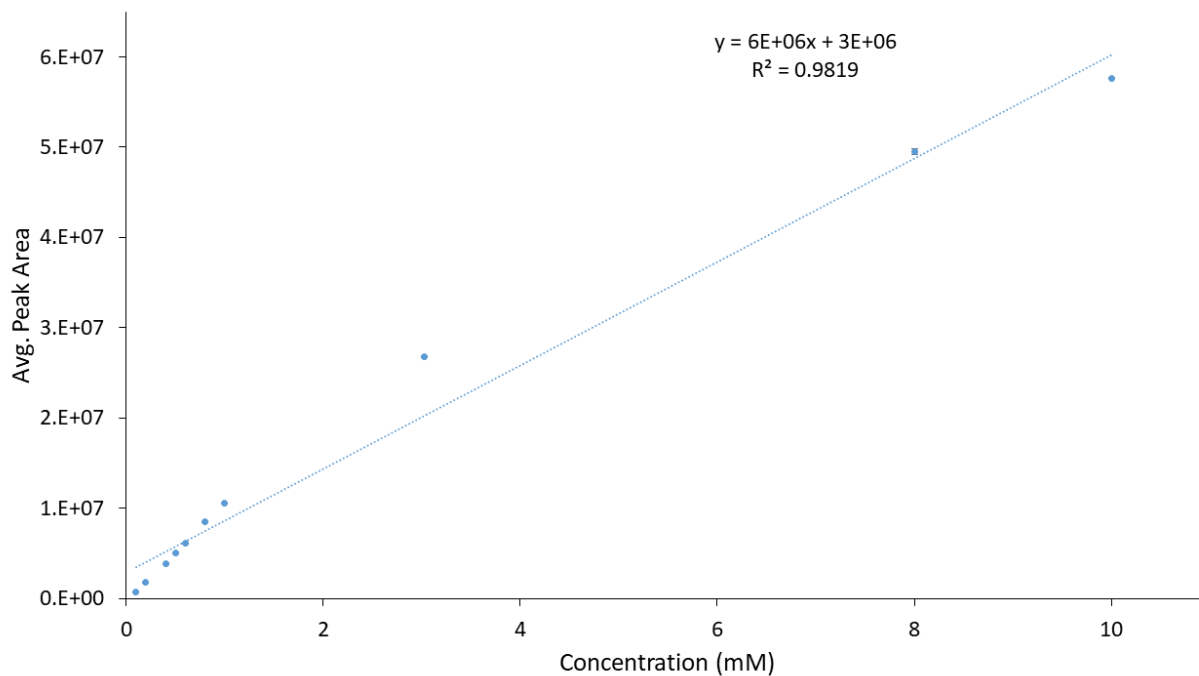

Figure S20. Calibration curve of DEHiBA in toluene (0.1 to 10 mM). Instrument response was non-linear above 1 mM DEHiBA.



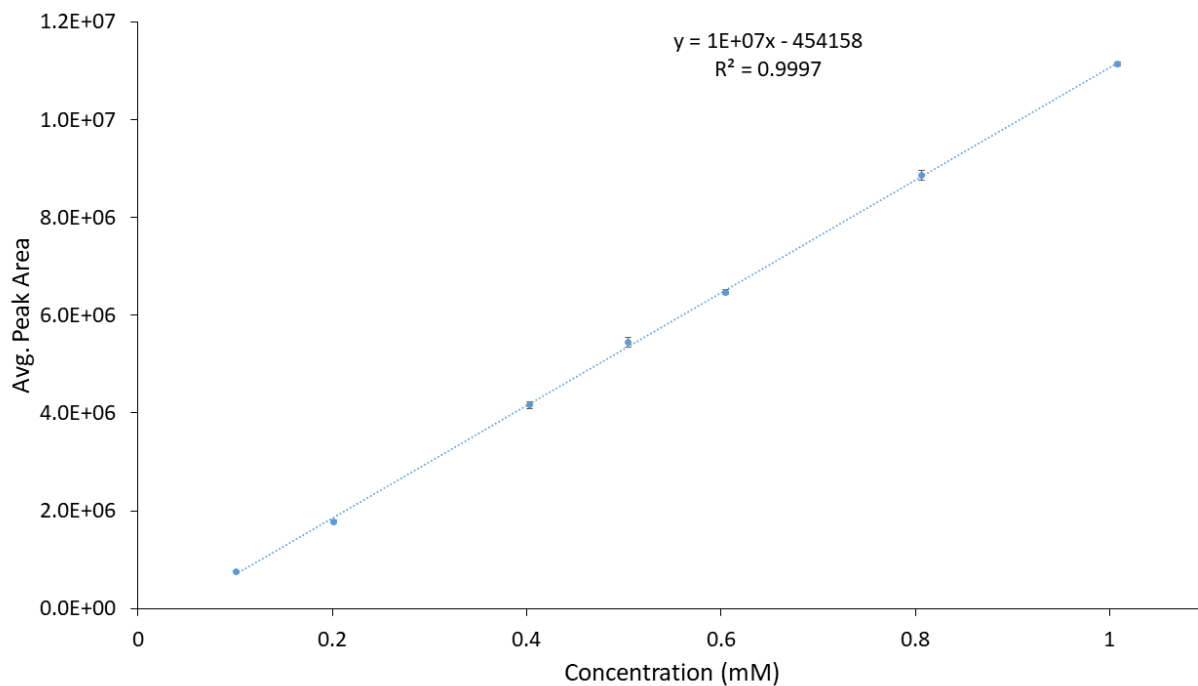

Figure S21. Linear region of the DEHBA calibration curve in toluene (0.1 to 1 mM).

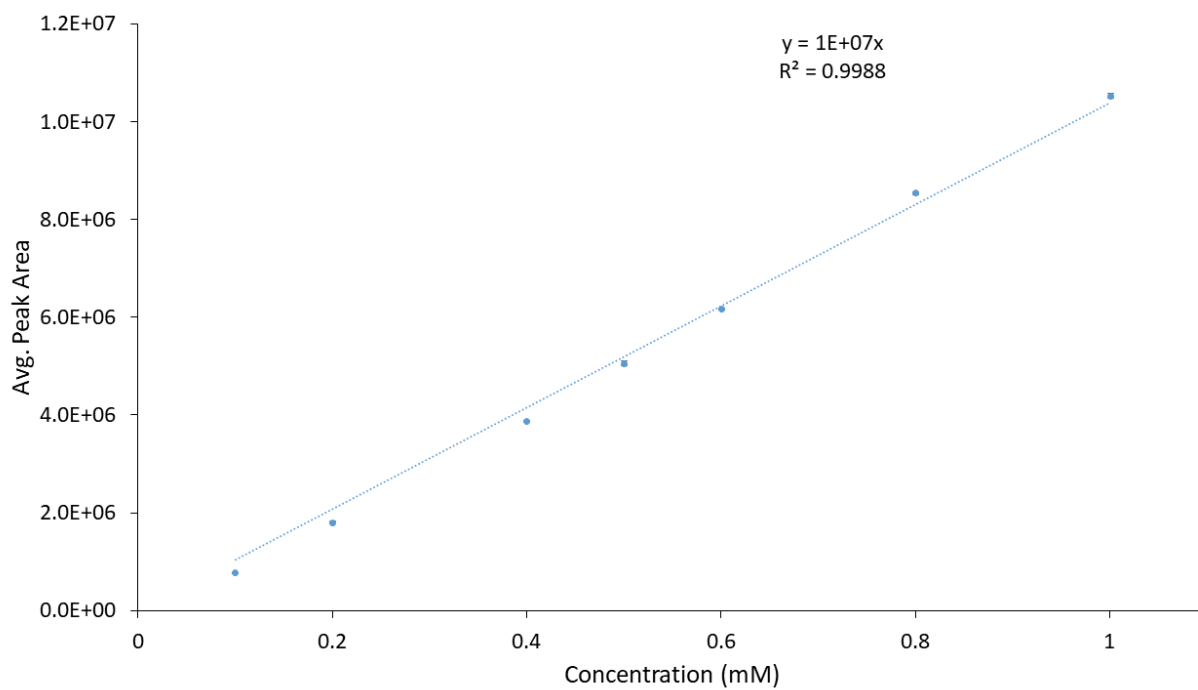

Figure S22. Linear region of the DEHBA calibration curve in toluene (0.1 to 1 mM).

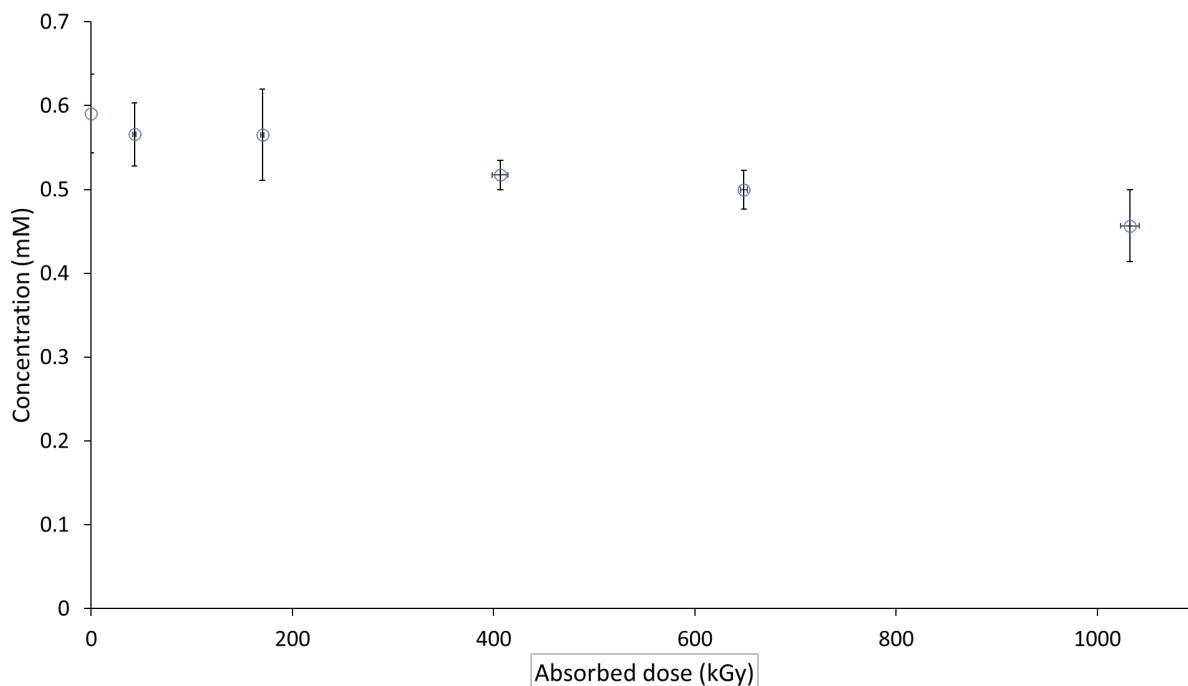

Figure S23. DEHBA concentration (mM) vs. absorbed dose (kGy) determined by GC-FID methods. The dose constants ( $d$ ,  $\text{kGy}^{-1}$ ) were calculated using the natural log of DEHBA concentration (mM) vs. absorbed dose (kGy).

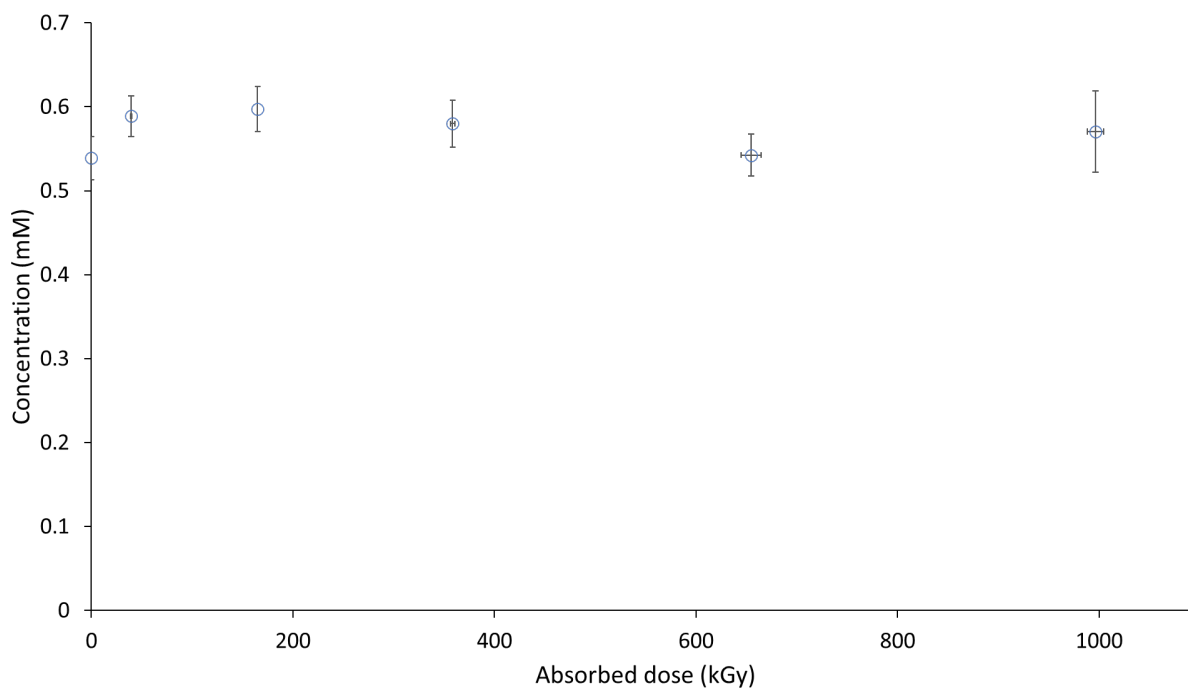

Figure S24. DEH/BA concentration (mM) vs. absorbed dose (kGy) determined by GC-FID methods. The dose constants ( $d$ ,  $\text{kGy}^{-1}$ ) were calculated using the natural log of DEH/BA concentration (mM) vs. absorbed dose (kGy).

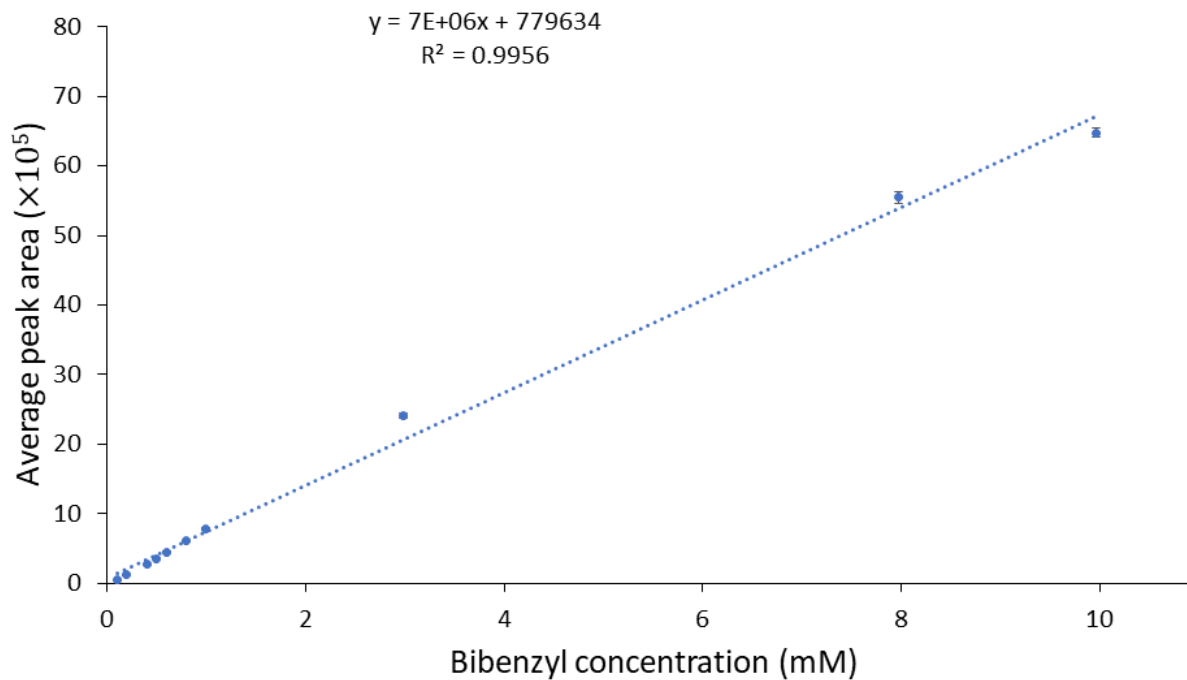

Figure S25. Calibration curve of bibenzyl in toluene (0.1 to 10 mM). Instrument response was non-linear after 3 mM dibenzyl.

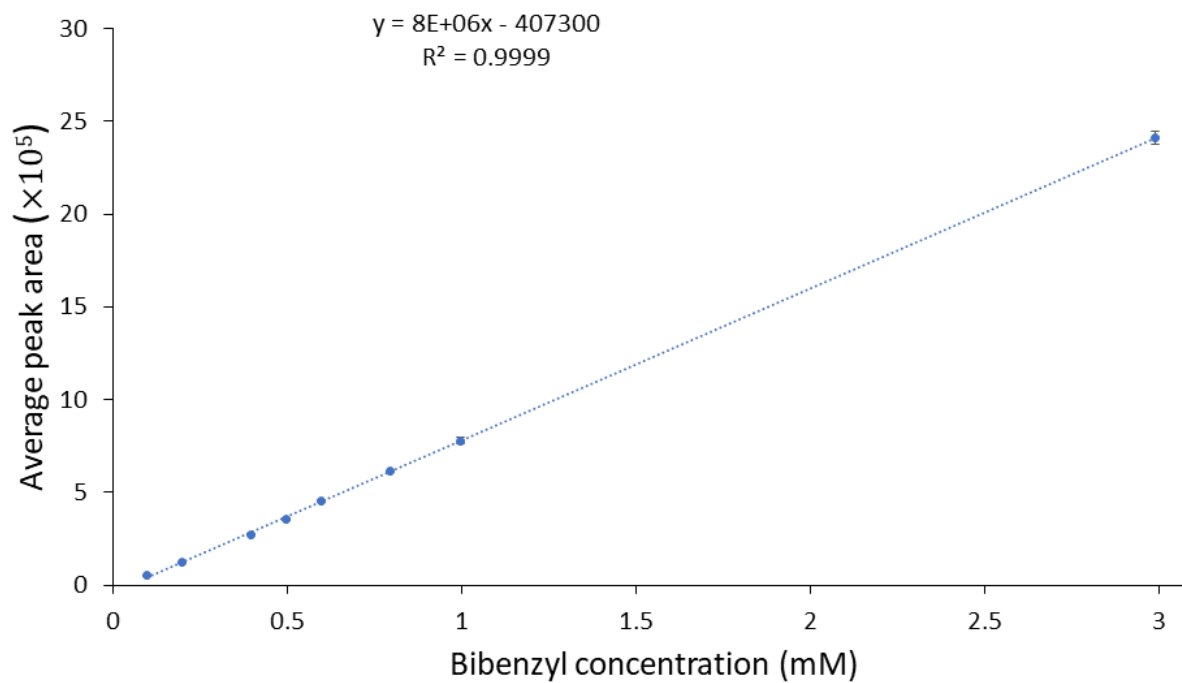

Figure S26. Linear region of the calibration curve of bibenzyl in toluene (0.1 to 3 mM).

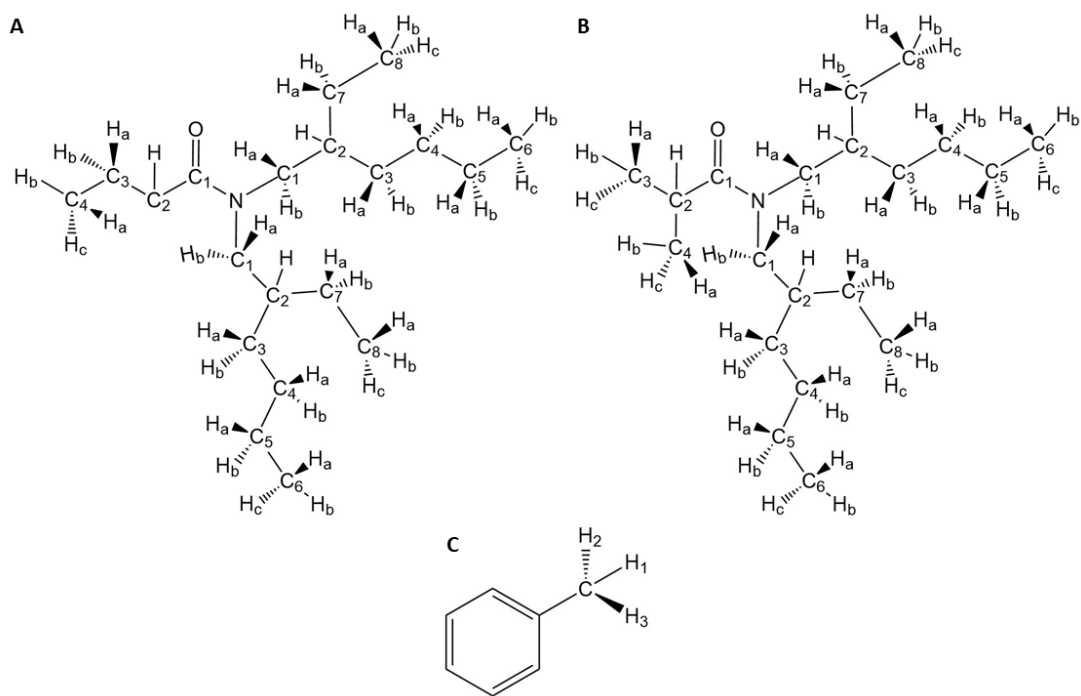

Figure S27. Monoamide and toluene structures showing labeling schemes for computations of radical energies (Tables S3-S5).

Table S3. Calculated energies of *N*-terminal radicals at different positions of the monoamide chain for DEHBA and DEHiBA ( $R_1$  = *N*-terminal alkyl, *trans* branching;  $R_2$  = *N*-terminal alkyl, *cis* branching; and  $R_3$  = *C*-terminal alkyl branching;  $x$  = *cis* branching;  $y$  = *trans* branching.)

| Structure Number | Structure                                                                           | Radical Position                    | Energy, kJ/mol |          | Energy difference from ground state, kJ/mol |        |
|------------------|-------------------------------------------------------------------------------------|-------------------------------------|----------------|----------|---------------------------------------------|--------|
|                  |                                                                                     |                                     | DEHBA          | DEH/BA   | DEHBA                                       | DEH/BA |
| 1.               | 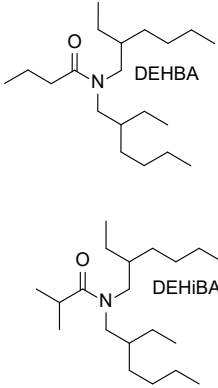   | Ground state                        | -2407369       | -2407374 | 0                                           | 0      |
| 2.               |   | <i>N</i> -terminal <i>cis</i><br>C1 | -2405607       | -2405618 | 1762                                        | 1756   |
| 3.               |  | <i>N</i> -terminal <i>cis</i><br>C1 | -2405600       | -2405601 | 1769                                        | 1773   |
| 4.               |  | <i>N</i> -terminal <i>cis</i><br>C2 | -2405609       | -2405612 | 1760                                        | 1762   |
| 5.               |  | <i>N</i> -terminal <i>cis</i><br>C3 | -2405593       | -2405597 | 1776                                        | 1776   |

|     |                                                                                     |                                       |          |          |      |      |
|-----|-------------------------------------------------------------------------------------|---------------------------------------|----------|----------|------|------|
| 6.  | 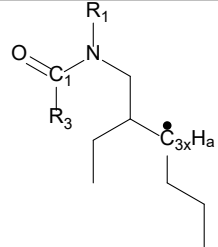   | <i>N</i> -terminal <i>cis</i><br>C3   | -2405596 | -2405599 | 1772 | 1775 |
| 7.  |    | <i>N</i> -terminal <i>cis</i><br>C4   | -2405596 | -2405600 | 1773 | 1774 |
| 8.  |    | <i>N</i> -terminal <i>cis</i><br>C5   | -2405591 | -2405596 | 1778 | 1778 |
| 9.  |   | <i>N</i> -terminal <i>cis</i><br>C6   | -2405578 | -2405581 | 1791 | 1793 |
| 10. |  | <i>N</i> -terminal<br><i>trans</i> C1 | -2405601 | -2405586 | 1767 | 1788 |
| 11. |  | <i>N</i> -terminal<br><i>trans</i> C1 | -2405589 | -2405611 | 1780 | 1763 |
| 12. |  | <i>N</i> -terminal<br><i>trans</i> C2 | -2405601 | -2405614 | 1767 | 1760 |

|     |                                                                                                                                                                                                                                                                                    |                                       |          |          |      |      |
|-----|------------------------------------------------------------------------------------------------------------------------------------------------------------------------------------------------------------------------------------------------------------------------------------|---------------------------------------|----------|----------|------|------|
| 13. | <p>The structure shows a branched alkyl chain attached to a nitrogen atom. The nitrogen is also bonded to an R<sub>2</sub> group and a carbonyl group (C=O) which is further bonded to an R<sub>3</sub> group. The radical is located on the C3yHb carbon of the side chain.</p>   | <i>N</i> -terminal<br><i>trans</i> C3 | -2405597 | -2405599 | 1772 | 1775 |
| 14. | <p>The structure is identical to entry 13, but the radical is located on the C3yHa carbon of the side chain.</p>                                                                                                                                                                   | <i>N</i> -terminal<br><i>trans</i> C3 | -2405596 | -2405602 | 1773 | 1772 |
| 15. | <p>The structure shows a branched alkyl chain attached to a nitrogen atom. The nitrogen is also bonded to an R<sub>2</sub> group and a carbonyl group (C=O) which is further bonded to an R<sub>3</sub> group. The radical is located on the HaC4y carbon of the side chain.</p>   | <i>N</i> -terminal<br><i>trans</i> C4 | -2405599 | -2405599 | 1769 | 1774 |
| 16. | <p>The structure shows a branched alkyl chain attached to a nitrogen atom. The nitrogen is also bonded to an R<sub>2</sub> group and a carbonyl group (C=O) which is further bonded to an R<sub>3</sub> group. The radical is located on the C5yHa carbon of the side chain.</p>   | <i>N</i> -terminal<br><i>trans</i> C5 | -2405592 | -2405596 | 1777 | 1778 |
| 17. | <p>The structure shows a branched alkyl chain attached to a nitrogen atom. The nitrogen is also bonded to an R<sub>2</sub> group and a carbonyl group (C=O) which is further bonded to an R<sub>3</sub> group. The radical is located on the HbHaC6y carbon of the side chain.</p> | <i>N</i> -terminal<br><i>trans</i> C6 | -2405578 | -2405583 | 1790 | 1791 |

Table S4. Calculated energies of C-terminal radicals at different positions of the monoamide chain for DEHBA and DEHiBA ( $R_1$  = *N*-terminal alkyl, *trans* branching;  $R_2$  = *N*-terminal alkyl, *cis* branching; and  $R_3$  = *C*-terminal alkyl branching;  $x$  = *cis* branching;  $y$  = *trans* branching).

| Structure Number | Structure                                                                           | Radical Position | Energy, kJ/mol | Energy difference from ground state, kJ/mol |
|------------------|-------------------------------------------------------------------------------------|------------------|----------------|---------------------------------------------|
| 18.              | 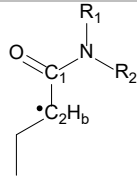   | C-terminal C2    | -2405604       | 1764                                        |
| 19.              |    | C-terminal C2    | -2405602       | 1766                                        |
| 20.              |    | C-terminal C3    | -2405585       | 1783                                        |
| 21.              |   | C-terminal C4    | -2405577       | 1792                                        |
| 22.              |  | C-terminal C2    | -2405613       | 1761                                        |
| 23.              |  | C-terminal C3    | -2405573       | 1801                                        |
| 24.              |  | C-terminal C4    | -2405574       | 1799                                        |



Table S5. Calculated energies of toluene and its radicals.

| Structure Number | Structure                                                                         | Radical Position | Energy, kJ/mol | Energy difference from ground state, kJ/mol |
|------------------|-----------------------------------------------------------------------------------|------------------|----------------|---------------------------------------------|
| 25.              | 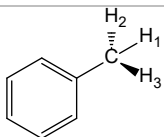 | Ground state     | -713051        | 0                                           |
| 26.              |  | Toluene_H1       | -711288        | 1763                                        |
| 27.              |  | Toluene_H2       | -711260        | 1792                                        |
| 28.              |  | Toluene_H3       | -711260        | 1792                                        |

Table S6. DFT Cartesian coordinates for DEHBA, DEHiBA, toluene, and their radicals. Structures numbers correspond to entry numbers in Tables S3-S5.

| Structure 1 DEHBA |              |              | H            | -18.88722000 | -7.97430000  | -27.46695000 |              |
|-------------------|--------------|--------------|--------------|--------------|--------------|--------------|--------------|
| C                 | -16.74645000 | -7.29581000  | -29.07958000 | H            | -18.87685000 | -7.57434000  | -25.73797000 |
| N                 | -16.24120000 | -8.46124000  | -28.50212000 | H            | -16.37582000 | -7.99570000  | -26.47395000 |
| O                 | -17.13335000 | -7.27087000  | -30.25033000 | C            | -14.26609000 | -8.12237000  | -26.93826000 |
| C                 | -16.80109000 | -6.03588000  | -28.22304000 | H            | -15.82952000 | -9.61507000  | -26.82743000 |
| H                 | -15.79834000 | -5.59850000  | -28.18194000 | H            | -14.14530000 | -7.12236000  | -27.37416000 |
| H                 | -17.11444000 | -6.27946000  | -27.20810000 | C            | -13.28946000 | -9.06537000  | -27.67244000 |
| C                 | -17.79291000 | -5.01342000  | -28.78734000 | C            | -13.97633000 | -7.98973000  | -25.42045000 |
| H                 | -17.40030000 | -4.58740000  | -29.71767000 | H            | -12.97645000 | -7.56505000  | -25.28188000 |
| C                 | -18.07850000 | -3.89601000  | -27.79616000 | C            | -14.10512000 | -9.29902000  | -24.62788000 |
| H                 | -18.73923000 | -5.50798000  | -29.03850000 | H            | -14.67201000 | -7.25244000  | -24.99835000 |
| H                 | -17.16214000 | -3.36138000  | -27.52836000 | H            | -13.37736000 | -10.03379000 | -24.98945000 |
| H                 | -18.52706000 | -4.29260000  | -26.87909000 | H            | -15.09809000 | -9.73359000  | -24.78517000 |
| H                 | -18.78133000 | -3.17661000  | -28.22863000 | C            | -13.93307000 | -9.11889000  | -23.11841000 |
| C                 | -15.72908000 | -8.57200000  | -27.13701000 | H            | -13.49034000 | -9.01594000  | -28.74932000 |
| C                 | -16.27237000 | -9.68589000  | -29.31095000 | H            | -13.46247000 | -10.10518000 | -27.37111000 |
| H                 | -15.95374000 | -9.39046000  | -30.31432000 | C            | -11.81939000 | -8.72955000  | -27.46484000 |
| C                 | -17.66291000 | -10.37276000 | -29.36502000 | H            | -11.50800000 | -8.90452000  | -26.43091000 |
| H                 | -15.51164000 | -10.38738000 | -28.94876000 | H            | -11.61360000 | -7.68583000  | -27.72079000 |
| C                 | -17.72524000 | -11.38505000 | -30.54216000 | H            | -11.19742000 | -9.36506000  | -28.10377000 |
| H                 | -18.43189000 | -9.61085000  | -29.54264000 | C            | -17.44869000 | -10.80928000 | -31.92359000 |
| C                 | -17.99572000 | -11.15323000 | -28.05866000 | H            | -18.72865000 | -11.83025000 | -30.56290000 |
| H                 | -18.20876000 | -12.19828000 | -28.32383000 | H            | -17.02001000 | -12.20659000 | -30.36154000 |
| C                 | -19.23453000 | -10.67037000 | -27.28309000 | H            | -18.04746000 | -9.91361000  | -32.11026000 |
| H                 | -17.12800000 | -11.22084000 | -27.39618000 | H            | -17.69581000 | -11.55191000 | -32.69002000 |
| H                 | -19.67520000 | -11.56199000 | -26.81654000 | H            | -16.39105000 | -10.56222000 | -32.05368000 |
| H                 | -20.00158000 | -10.28012000 | -27.96136000 | C            | -12.53619000 | -8.67646000  | -22.71749000 |
| C                 | -18.93954000 | -9.69279000  | -26.14219000 | H            | -14.14851000 | -10.07768000 | -22.63107000 |
| H                 | -19.54234000 | -9.97207000  | -25.26887000 | H            | -14.66993000 | -8.40068000  | -22.74037000 |
| C                 | -19.28448000 | -8.25633000  | -26.49161000 | H            | -12.43599000 | -8.69492000  | -21.62766000 |
| H                 | -17.89832000 | -9.76916000  | -25.81731000 | H            | -12.32961000 | -7.65608000  | -23.05268000 |
| H                 | -20.36914000 | -8.11468000  | -26.51882000 | H            | -11.77677000 | -9.34191000  | -23.13978000 |

**Structure 1 DEHBA**

|   |              |             |             |
|---|--------------|-------------|-------------|
| C | -41.58679000 | 4.90840000  | 17.54866000 |
| N | -40.40565000 | 4.16886000  | 17.43926000 |
| O | -42.46741000 | 4.84248000  | 16.68693000 |
| C | -41.80805000 | 5.73836000  | 18.81953000 |
| C | -43.04898000 | 6.62506000  | 18.66204000 |
| H | -40.94941000 | 6.39635000  | 18.97825000 |
| C | -42.00503000 | 4.82763000  | 20.03439000 |
| C | -39.14957000 | 4.54266000  | 18.10778000 |
| C | -40.34167000 | 3.13945000  | 16.39363000 |
| H | -40.90520000 | 3.48091000  | 15.51708000 |
| C | -40.85643000 | 1.72930000  | 16.82710000 |
| H | -39.29987000 | 3.04778000  | 16.07187000 |
| C | -42.33895000 | 1.80160000  | 17.26276000 |
| H | -40.25649000 | 1.39936000  | 17.68544000 |
| C | -40.59982000 | 0.77384000  | 15.63220000 |
| H | -41.30333000 | 1.02071000  | 14.82899000 |
| C | -40.66297000 | -0.72535000 | 15.94008000 |
| H | -39.59470000 | 0.97506000  | 15.23659000 |
| H | -41.67502000 | -1.02935000 | 16.20096000 |
| H | -40.02700000 | -0.94777000 | 16.80593000 |
| C | -40.21390000 | -1.60177000 | 14.76485000 |
| H | -39.16103000 | -1.40725000 | 14.53168000 |
| C | -41.05506000 | -1.40977000 | 13.51077000 |
| H | -40.28237000 | -2.65212000 | 15.07305000 |
| H | -40.87864000 | -0.42805000 | 13.05982000 |
| H | -42.12323000 | -1.50164000 | 13.73052000 |
| H | -40.79492000 | -2.16585000 | 12.76245000 |
| H | -39.38193000 | 4.74223000  | 19.15357000 |
| C | -38.46371000 | 5.79467000  | 17.49483000 |
| H | -38.47689000 | 3.67809000  | 18.11337000 |
| H | -39.20904000 | 6.60037000  | 17.45222000 |
| C | -37.98706000 | 5.58506000  | 16.03772000 |
| C | -37.29012000 | 6.30426000  | 18.36509000 |
| H | -36.54602000 | 5.50965000  | 18.48980000 |
| C | -37.70263000 | 6.80926000  | 19.75240000 |
| H | -36.79105000 | 7.12662000  | 17.83438000 |
| H | -38.10084000 | 5.98279000  | 20.34955000 |
| H | -38.49695000 | 7.55914000  | 19.65762000 |
| C | -36.50788000 | 7.42037000  | 20.48951000 |
| H | -37.67359000 | 6.55426000  | 15.62789000 |
| H | -38.82848000 | 5.26515000  | 15.41408000 |
| C | -36.83092000 | 4.60754000  | 15.86181000 |
| H | -37.03830000 | 3.63606000  | 16.31719000 |
| H | -35.90788000 | 5.00059000  | 16.29890000 |
| H | -36.64110000 | 4.44314000  | 14.79613000 |
| C | -42.96271000 | 0.53120000  | 17.81312000 |
| H | -42.95478000 | 2.16753000  | 16.43235000 |
| H | -42.42555000 | 2.53440000  | 18.06950000 |
| H | -42.26594000 | -0.02093000 | 18.45054000 |
| H | -43.84214000 | 0.78419000  | 18.41731000 |
| H | -43.32314000 | -0.11542000 | 17.00961000 |
| C | -36.85314000 | 7.75926000  | 21.93024000 |
| H | -36.17833000 | 8.32913000  | 19.97199000 |
| H | -35.66452000 | 6.71982000  | 20.48195000 |
| H | -37.67997000 | 8.47454000  | 21.98012000 |
| H | -35.98788000 | 8.20059000  | 22.43409000 |
| H | -37.14298000 | 6.85943000  | 22.48334000 |
| H | -43.95665000 | 6.02176000  | 18.53225000 |
| H | -42.95572000 | 7.27581000  | 17.78848000 |

|   |              |            |             |
|---|--------------|------------|-------------|
| H | -43.19217000 | 7.25603000 | 19.54480000 |
| H | -42.87147000 | 4.17091000 | 19.89708000 |
| H | -42.17046000 | 5.42109000 | 20.93936000 |
| H | -41.14308000 | 4.18079000 | 20.21577000 |

**Structure 2**

## DEHBA\_Ncis\_C1H1\_radical

|   |             |             |             |
|---|-------------|-------------|-------------|
| C | -0.73583700 | 1.61820700  | -0.52402800 |
| N | -0.27068800 | 0.32792800  | -0.44596000 |
| O | -1.73426000 | 1.89354300  | -1.18133900 |
| C | 0.00447800  | 2.69682300  | 0.27040600  |
| H | 1.07450600  | 2.66739700  | 0.04314000  |
| H | -0.07919500 | 2.45388300  | 1.33798700  |
| C | -0.54109500 | 4.10348600  | 0.01663500  |
| H | -0.46170600 | 4.33136700  | -1.05013600 |
| C | 0.19204800  | 5.16789800  | 0.83775700  |
| H | -1.60972000 | 4.12009800  | 0.24355400  |
| H | 1.26092000  | 5.19373700  | 0.60073100  |
| H | 0.09731600  | 4.98041100  | 1.91254900  |
| H | -0.21299200 | 6.16409000  | 0.64049700  |
| C | 0.96878400  | -0.04869100 | 0.24450900  |
| C | -1.05608000 | -0.71113400 | -1.13514000 |
| H | -1.28738300 | -0.34574100 | -2.13623100 |
| C | -2.36705000 | -1.11367300 | -0.42335400 |
| H | -0.41685400 | -1.59132400 | -1.23986000 |
| C | -3.17385600 | -2.07578600 | -1.31943100 |
| H | -2.94565300 | -0.19504600 | -0.29574700 |
| C | -2.07483500 | -1.72591200 | 0.96103600  |
| H | -1.53429400 | -2.67197500 | 0.81327000  |
| C | -3.26803600 | -1.99755100 | 1.89794300  |
| H | -1.38575700 | -1.06251100 | 1.49614800  |
| H | -2.86442900 | -2.52155400 | 2.77171700  |
| H | -3.96882100 | -2.70258300 | 1.43602700  |
| C | -4.04298200 | -0.75664200 | 2.39182800  |
| H | -4.41889300 | -0.96242400 | 3.40022000  |
| C | -5.23368900 | -0.33271100 | 1.52213600  |
| H | -3.34791900 | 0.08520700  | 2.49965300  |
| H | -5.95824900 | -1.14851800 | 1.43142100  |
| H | -4.93140400 | -0.04388300 | 0.51348200  |
| H | -5.75414300 | 0.52184300  | 1.96444600  |
| C | 2.27546400  | 0.13519100  | -0.56590300 |
| H | 0.86385400  | -1.09420200 | 0.53970900  |
| H | 2.29409600  | 1.17744400  | -0.90947800 |
| C | 2.31046600  | -0.74453000 | -1.83052400 |
| C | 3.50713600  | -0.03723000 | 0.35464400  |
| H | 4.39441100  | 0.29377600  | -0.19234000 |
| C | 3.74995300  | -1.44875200 | 0.91243600  |
| H | 3.40440900  | 0.65896700  | 1.19769600  |
| H | 3.91231300  | -2.15363400 | 0.08820100  |
| H | 2.85429300  | -1.79756200 | 1.43805700  |
| C | 4.94053900  | -1.53874000 | 1.88236900  |
| H | 1.40739500  | -0.54195900 | -2.41358200 |
| H | 2.26006500  | -1.80315500 | -1.54883300 |
| C | 3.52957800  | -0.51274300 | -2.73030800 |
| H | 4.46436900  | -0.80248600 | -2.24347000 |
| H | 3.61556700  | 0.54122700  | -3.01405300 |
| H | 3.44690800  | -1.09552300 | -3.65171000 |
| C | -3.77086000 | -1.44394500 | -2.58344500 |
| H | -3.99192700 | -2.50181400 | -0.73129400 |
| H | -2.53439800 | -2.92552200 | -1.59662800 |
| H | -4.41485200 | -0.59648300 | -2.33171500 |
| H | -4.37618600 | -2.17297800 | -3.12992100 |

|   |             |             |             |
|---|-------------|-------------|-------------|
| H | -3.00461300 | -1.07655300 | -3.27009500 |
| C | 6.30902100  | -1.28504500 | 1.23980300  |
| H | 4.94324700  | -2.53594300 | 2.33642100  |
| H | 4.78723400  | -0.83140400 | 2.70692000  |
| H | 7.11382200  | -1.42062000 | 1.96757300  |
| H | 6.39598800  | -0.26958500 | 0.84435700  |
| H | 6.49026600  | -1.98043800 | 0.41356400  |

**Structure 2**

DEHiBA\_Ncis\_C1H1\_radical

|   |             |             |             |
|---|-------------|-------------|-------------|
| C | 0.49597200  | 2.02591200  | -0.75819800 |
| N | 0.09767200  | 0.72712900  | -0.53994800 |
| O | -0.26178800 | 2.85875500  | -1.24596200 |
| C | 1.91065300  | 2.45908300  | -0.34531200 |
| C | 2.58349500  | 3.19685300  | -1.51244100 |
| H | 2.52458600  | 1.59635200  | -0.08776500 |
| C | 1.80658100  | 3.36313600  | 0.89731600  |
| C | 0.95709900  | -0.32328900 | 0.02519500  |
| C | -1.28656200 | 0.36037900  | -0.87360900 |
| H | -1.66929300 | 1.13337200  | -1.54004300 |
| C | -2.23868700 | 0.20013700  | 0.33470200  |
| H | -1.26620600 | -0.58093200 | -1.42945600 |
| C | -2.33504400 | 1.50080600  | 1.15278300  |
| H | -1.82239400 | -0.57727500 | 0.99172100  |
| C | -3.61480900 | -0.30215500 | -0.17891500 |
| H | -4.30971200 | 0.54324000  | -0.21735500 |
| C | -4.22299600 | -1.45388100 | 0.63637600  |
| H | -3.51296800 | -0.64585100 | -1.21647000 |
| H | -4.35957200 | -1.14382700 | 1.67885300  |
| H | -3.50068100 | -2.27944600 | 0.65978000  |
| C | -5.55683600 | -1.98587900 | 0.08881500  |
| H | -5.42106100 | -2.28953000 | -0.95686300 |
| C | -6.72559700 | -0.99828400 | 0.18529100  |
| H | -5.81896600 | -2.89817300 | 0.63663200  |
| H | -6.55296900 | -0.09910400 | -0.41197100 |
| H | -6.88899300 | -0.68275300 | 1.22102000  |
| H | -7.65381000 | -1.45340400 | -0.17146800 |
| C | 1.96073800  | -0.97450800 | -0.95644100 |
| H | 0.29399200  | -1.09464600 | 0.42378900  |
| H | 2.56420400  | -0.16599400 | -1.38658200 |
| C | 1.28103000  | -1.68029600 | -2.15072700 |
| C | 2.92357900  | -1.91643000 | -0.20101500 |
| H | 2.34990800  | -2.59197800 | 0.44649400  |
| C | 4.00376100  | -1.21450000 | 0.63397200  |
| H | 3.42259700  | -2.56072300 | -0.93527400 |
| H | 3.54381000  | -0.57453700 | 1.39659200  |
| H | 4.58303800  | -0.54617200 | -0.01618100 |
| C | 4.96044800  | -2.19238000 | 1.32729600  |
| H | 2.06490100  | -1.93851300 | -2.87216700 |
| H | 0.63342500  | -0.96203000 | -2.66349100 |
| C | 0.48430300  | -2.94961100 | -1.82163800 |
| H | -0.32338600 | -2.76178500 | -1.10835800 |
| H | 1.12129400  | -3.73086400 | -1.39878100 |
| H | 0.02661100  | -3.35716800 | -2.72709900 |
| C | -3.15852600 | 1.39556900  | 2.44052100  |
| H | -2.74804900 | 2.28857300  | 0.51282500  |
| H | -1.32332600 | 1.82812200  | 1.41064900  |
| H | -2.76800700 | 0.61548600  | 3.10269200  |
| H | -3.13229500 | 2.33967200  | 2.99199900  |
| H | -4.20849000 | 1.16593700  | 2.24041200  |
| C | 6.04806800  | -1.49488500 | 2.14928200  |
| H | 5.42887000  | -2.83404300 | 0.57113800  |

|   |            |             |             |
|---|------------|-------------|-------------|
| H | 4.38353500 | -2.86119900 | 1.97757400  |
| H | 6.66416100 | -0.84483300 | 1.52002100  |
| H | 6.71269700 | -2.21924000 | 2.62800900  |
| H | 5.61171000 | -0.87372700 | 2.93794300  |
| H | 1.98130500 | 4.05533300  | -1.81442600 |
| H | 2.70108100 | 2.54589600  | -2.38359700 |
| H | 3.57571400 | 3.54865300  | -1.21575000 |
| H | 1.18515500 | 4.23449000  | 0.67960100  |
| H | 2.79931100 | 3.71073600  | 1.19688000  |
| H | 1.36444800 | 2.83505000  | 1.74745100  |

**Structure 3**

DEHBA\_Ncis\_C1H2\_radical

|   |             |             |             |
|---|-------------|-------------|-------------|
| C | -0.73583700 | 1.61820700  | -0.52402800 |
| N | -0.27068800 | 0.32792800  | -0.44596000 |
| O | -1.73426000 | 1.89354300  | -1.18133900 |
| C | 0.00447800  | 2.69682300  | 0.27040600  |
| H | 1.07450600  | 2.66739700  | 0.04314000  |
| H | -0.07919500 | 2.45388300  | 1.33798700  |
| C | -0.54109500 | 4.10348600  | 0.01663500  |
| H | -0.46170600 | 4.33136700  | -1.05013600 |
| C | 0.19204800  | 5.16789800  | 0.83775700  |
| H | -1.60972000 | 4.12009800  | 0.24355400  |
| H | 1.26092000  | 5.19373700  | 0.60073100  |
| H | 0.09731600  | 4.98041100  | 1.91254900  |
| H | -0.21299200 | 6.16409000  | 0.64049700  |
| C | 0.96878400  | -0.04869100 | 0.24450900  |
| C | -1.05608000 | -0.71113400 | -1.13514000 |
| H | -1.28738300 | -0.34574100 | -2.13623100 |
| C | -2.36705000 | -1.11367300 | -0.42335400 |
| H | -0.41685400 | -1.59132400 | -1.23986000 |
| C | -3.17385600 | -2.07578600 | -1.31943100 |
| H | -2.94565300 | -0.19504600 | -0.29574700 |
| C | -2.07483500 | -1.72591200 | 0.96103600  |
| H | -1.53429400 | -2.67197500 | 0.81327000  |
| C | -3.26803600 | -1.99755100 | 1.89794300  |
| H | -1.38575700 | -1.06251100 | 1.49614800  |
| H | -2.86442900 | -2.52155400 | 2.77171700  |
| H | -3.96882100 | -2.70258300 | 1.43602700  |
| C | -4.04298200 | -0.75664200 | 2.39182800  |
| H | -4.41889300 | -0.96242400 | 3.40022000  |
| C | -5.23368900 | -0.33271100 | 1.52213600  |
| H | -3.34791900 | 0.08520700  | 2.49965300  |
| H | -5.95824900 | -1.14851800 | 1.43142100  |
| H | -4.93140400 | -0.04388300 | 0.51348200  |
| H | -5.75414300 | 0.52184300  | 1.96444600  |
| H | 1.04843200  | 0.52101300  | 1.17397100  |
| C | 2.27546400  | 0.13519100  | -0.56590300 |
| H | 2.29409600  | 1.17744400  | -0.90947800 |
| C | 2.31046600  | -0.74453000 | -1.83052400 |
| C | 3.50713600  | -0.03723000 | 0.35464400  |
| H | 4.39441100  | 0.29377600  | -0.19234000 |
| C | 3.74995300  | -1.44875200 | 0.91243600  |
| H | 3.40440900  | 0.65896700  | 1.19769600  |
| H | 3.91231300  | -2.15363400 | 0.08820100  |
| H | 2.85429300  | -1.79756200 | 1.43805700  |
| C | 4.94053900  | -1.53874000 | 1.88236900  |
| H | 1.40739500  | -0.54195900 | -2.41358200 |
| H | 2.26006500  | -1.80315500 | -1.54883300 |
| C | 3.52957800  | -0.51274300 | -2.73030800 |
| H | 4.46436900  | -0.80248600 | -2.24347000 |
| H | 3.61556700  | 0.54122700  | -3.01405300 |

|   |             |             |             |
|---|-------------|-------------|-------------|
| H | 3.44690800  | -1.09552300 | -3.65171000 |
| C | -3.77086000 | -1.44394500 | -2.58344500 |
| H | -3.99192700 | -2.50181400 | -0.73129400 |
| H | -2.53439800 | -2.92552200 | -1.59662800 |
| H | -4.41485200 | -0.59648300 | -2.33171500 |
| H | -4.37618600 | -2.17297800 | -3.12992100 |
| H | -3.00461300 | -1.07655300 | -3.27009500 |
| C | 6.30902100  | -1.28504500 | 1.23980300  |
| H | 4.94324700  | -2.53594300 | 2.33642100  |
| H | 4.78723400  | -0.83140400 | 2.70692000  |
| H | 7.11382200  | -1.42062000 | 1.96757300  |
| H | 6.39598800  | -0.26958500 | 0.84435700  |
| H | 6.49026600  | -1.98043800 | 0.41356400  |

### Structure 3

DEHiBA\_Ncis\_C1H2\_radical

|   |             |             |             |
|---|-------------|-------------|-------------|
| C | 0.49597200  | 2.02591200  | -0.75819800 |
| N | 0.09767200  | 0.72712900  | -0.53994800 |
| O | -0.26178800 | 2.85875500  | -1.24596200 |
| C | 1.91065300  | 2.45908300  | -0.34531200 |
| C | 2.58349500  | 3.19685300  | -1.51244100 |
| H | 2.52458600  | 1.59635200  | -0.08776500 |
| C | 1.80658100  | 3.36313600  | 0.89731600  |
| C | 0.95709900  | -0.32328900 | 0.02519500  |
| C | -1.28656200 | 0.36037900  | -0.87360900 |
| H | -1.66929300 | 1.13337200  | -1.54004300 |
| C | -2.23868700 | 0.20013700  | 0.33470200  |
| H | -1.26620600 | -0.58093200 | -1.42945600 |
| C | -2.33504400 | 1.50080600  | 1.15278300  |
| H | -1.82239400 | -0.57727500 | 0.99172100  |
| C | -3.61480900 | -0.30215500 | -0.17891500 |
| H | -4.30971200 | 0.54324000  | -0.21735500 |
| C | -4.22299600 | -1.45388100 | 0.63637600  |
| H | -3.51296800 | -0.64585100 | -1.21647000 |
| H | -4.35957200 | -1.14382700 | 1.67885300  |
| H | -3.50068100 | -2.27944600 | 0.65978000  |
| C | -5.55683600 | -1.98587900 | 0.08881500  |
| H | -5.42106100 | -2.28953000 | -0.95686300 |
| C | -6.72559700 | -0.99828400 | 0.18529100  |
| H | -5.81896600 | -2.89817300 | 0.63663200  |
| H | -6.55296900 | -0.09910400 | -0.41197100 |
| H | -6.88899300 | -0.68275300 | 1.22102000  |
| H | -7.65381000 | -1.45340400 | -0.17146800 |
| H | 1.49439900  | 0.07222800  | 0.88884700  |
| C | 1.96073800  | -0.97450800 | -0.95644100 |
| H | 2.56420400  | -0.16599400 | -1.38658200 |
| C | 1.28103000  | -1.68029600 | -2.15072700 |
| C | 2.92357900  | -1.91643000 | -0.20101500 |
| H | 2.34990800  | -2.59197800 | 0.44649400  |
| C | 4.00376100  | -1.21450000 | 0.63397200  |
| H | 3.42259700  | -2.56072300 | -0.93527400 |
| H | 3.54381000  | -0.57453700 | 1.39659200  |
| H | 4.58303800  | -0.54617200 | -0.01618100 |
| C | 4.96044800  | -2.19238000 | 1.32729600  |
| H | 2.06490100  | -1.93851300 | -2.87216700 |
| H | 0.63342500  | -0.96203000 | -2.66349100 |
| C | 0.48430300  | -2.94961100 | -1.82163800 |
| H | -0.32338600 | -2.76178500 | -1.10835800 |
| H | 1.12129400  | -3.73086400 | -1.39878100 |
| H | 0.02661100  | -3.35716800 | -2.72709900 |
| C | -3.15852600 | 1.39556900  | 2.44052100  |
| H | -2.74804900 | 2.28857300  | 0.51282500  |

|   |             |             |             |
|---|-------------|-------------|-------------|
| H | -1.32332600 | 1.82812200  | 1.41064900  |
| H | -2.76800700 | 0.61548600  | 3.10269200  |
| H | -3.13229500 | 2.33967200  | 2.99199900  |
| H | -4.20849000 | 1.16593700  | 2.24041200  |
| C | 6.04806800  | -1.49488500 | 2.14928200  |
| H | 5.42887000  | -2.83404300 | 0.57113800  |
| H | 4.38353500  | -2.86119900 | 1.97757400  |
| H | 6.66416100  | -0.84483300 | 1.52002100  |
| H | 6.71269700  | -2.21924000 | 2.62800900  |
| H | 5.61171000  | -0.87372700 | 2.93794300  |
| H | 1.98130500  | 4.05533300  | -1.81442600 |
| H | 2.70108100  | 2.54589600  | -2.38359700 |
| H | 3.57571400  | 3.54865300  | -1.21575000 |
| H | 1.18515500  | 4.23449000  | 0.67960100  |
| H | 2.79931100  | 3.71073600  | 1.19688000  |
| H | 1.36444800  | 2.83505000  | 1.74745100  |

### Structure 4

DEHBA\_Ncis\_C2\_radical

|   |             |             |             |
|---|-------------|-------------|-------------|
| C | -0.73583700 | 1.61820700  | -0.52402800 |
| N | -0.27068800 | 0.32792800  | -0.44596000 |
| O | -1.73426000 | 1.89354300  | -1.18133900 |
| C | 0.00447800  | 2.69682300  | 0.27040600  |
| H | 1.07450600  | 2.66739700  | 0.04314000  |
| H | -0.07919500 | 2.45388300  | 1.33798700  |
| C | -0.54109500 | 4.10348600  | 0.01663500  |
| H | -0.46170600 | 4.33136700  | -1.05013600 |
| C | 0.19204800  | 5.16789800  | 0.83775700  |
| H | -1.60972000 | 4.12009800  | 0.24355400  |
| H | 1.26092000  | 5.19373700  | 0.60073100  |
| H | 0.09731600  | 4.98041100  | 1.91254900  |
| H | -0.21299200 | 6.16409000  | 0.64049700  |
| C | 0.96878400  | -0.04869100 | 0.24450900  |
| C | -1.05608000 | -0.71113400 | -1.13514000 |
| H | -1.28738300 | -0.34574100 | -2.13623100 |
| C | -2.36705000 | -1.11367300 | -0.42335400 |
| H | -0.41685400 | -1.59132400 | -1.23986000 |
| C | -3.17385600 | -2.07578600 | -1.31943100 |
| H | -2.94565300 | -0.19504600 | -0.29574700 |
| C | -2.07483500 | -1.72591200 | 0.96103600  |
| H | -1.53429400 | -2.67197500 | 0.81327000  |
| C | -3.26803600 | -1.99755100 | 1.89794300  |
| H | -1.38575700 | -1.06251100 | 1.49614800  |
| H | -2.86442900 | -2.52155400 | 2.77171700  |
| H | -3.96882100 | -2.70258300 | 1.43602700  |
| C | -4.04298200 | -0.75664200 | 2.39182800  |
| H | -4.41889300 | -0.96242400 | 3.40022000  |
| C | -5.23368900 | -0.33271100 | 1.52213600  |
| H | -3.34791900 | 0.08520700  | 2.49965300  |
| H | -5.95824900 | -1.14851800 | 1.43142100  |
| H | -4.93140400 | -0.04388300 | 0.51348200  |
| H | -5.75414300 | 0.52184300  | 1.96444600  |
| H | 1.04843200  | 0.52101300  | 1.17397100  |
| C | 2.27546400  | 0.13519100  | -0.56590300 |
| H | 0.86385400  | -1.09420200 | 0.53970900  |
| C | 2.31046600  | -0.74453000 | -1.83052400 |
| C | 3.50713600  | -0.03723000 | 0.35464400  |
| H | 4.39441100  | 0.29377600  | -0.19234000 |
| C | 3.74995300  | -1.44875200 | 0.91243600  |
| H | 3.40440900  | 0.65896700  | 1.19769600  |
| H | 3.91231300  | -2.15363400 | 0.08820100  |
| H | 2.85429300  | -1.79756200 | 1.43805700  |

|   |             |             |             |
|---|-------------|-------------|-------------|
| C | 4.94053900  | -1.53874000 | 1.88236900  |
| H | 1.40739500  | -0.54195900 | -2.41358200 |
| H | 2.26006500  | -1.80315500 | -1.54883300 |
| C | 3.52957800  | -0.51274300 | -2.73030800 |
| H | 4.46436900  | -0.80248600 | -2.24347000 |
| H | 3.61556700  | 0.54122700  | -3.01405300 |
| H | 3.44690800  | -1.09552300 | -3.65171000 |
| C | -3.77086000 | -1.44394500 | -2.58344500 |
| H | -3.99192700 | -2.50181400 | -0.73129400 |
| H | -2.53439800 | -2.92552200 | -1.59662800 |
| H | -4.41485200 | -0.59648300 | -2.33171500 |
| H | -4.37618600 | -2.17297800 | -3.12992100 |
| H | -3.00461300 | -1.07655300 | -3.27009500 |
| C | 6.30902100  | -1.28504500 | 1.23980300  |
| H | 4.94324700  | -2.53594300 | 2.33642100  |
| H | 4.78723400  | -0.83140400 | 2.70692000  |
| H | 7.11382200  | -1.42062000 | 1.96757300  |
| H | 6.39598800  | -0.26958500 | 0.84435700  |
| H | 6.49026600  | -1.98043800 | 0.41356400  |

#### Structure 4

DEHiBA\_Ncis\_C2\_radical

|   |             |             |             |
|---|-------------|-------------|-------------|
| C | 0.49597200  | 2.02591200  | -0.75819800 |
| N | 0.09767200  | 0.72712900  | -0.53994800 |
| O | -0.26178800 | 2.85875500  | -1.24596200 |
| C | 1.91065300  | 2.45908300  | -0.34531200 |
| C | 2.58349500  | 3.19685300  | -1.51244100 |
| H | 2.52458600  | 1.59635200  | -0.08776500 |
| C | 1.80658100  | 3.36313600  | 0.89731600  |
| C | 0.95709900  | -0.32328900 | 0.02519500  |
| C | -1.28656200 | 0.36037900  | -0.87360900 |
| H | -1.66929300 | 1.13337200  | -1.54004300 |
| C | -2.23868700 | 0.20013700  | 0.33470200  |
| H | -1.26620600 | -0.58093200 | -1.42945600 |
| C | -2.33504400 | 1.59080600  | 1.15278300  |
| H | -1.82239400 | -0.57727500 | 0.99172100  |
| C | -3.61480900 | -0.30215500 | -0.17891500 |
| H | -4.30971200 | 0.54324000  | -0.21735500 |
| C | -4.22299600 | -1.45388100 | 0.63637600  |
| H | -3.51296800 | -0.64585100 | -1.21647000 |
| H | -4.35957200 | -1.14382700 | 1.67885300  |
| H | -3.50068100 | -2.27944600 | 0.65978000  |
| C | -5.55683600 | -1.98587900 | 0.08881500  |
| H | -5.42106100 | -2.28953000 | -0.95686300 |
| C | -6.72559700 | -0.99828400 | 0.18529100  |
| H | -5.81896600 | -2.89817300 | 0.63663200  |
| H | -6.55296900 | -0.09910400 | -0.41197100 |
| H | -6.88899300 | -0.68275300 | 1.22102000  |
| H | -7.65381000 | -1.45340400 | -0.17146800 |
| H | 1.49439900  | 0.07222800  | 0.88884700  |
| C | 1.96073800  | -0.97450800 | -0.95644100 |
| H | 0.29399200  | -1.09464600 | 0.42378900  |
| C | 1.28103000  | -1.68029600 | -2.15072700 |
| C | 2.92357900  | -1.91643000 | -0.20101500 |
| H | 2.34990800  | -2.59197800 | 0.44649400  |
| C | 4.00376100  | -1.21450000 | 0.63397200  |
| H | 3.42259700  | -2.56072300 | -0.93527400 |
| H | 3.54381000  | -0.57453700 | 1.39659200  |
| H | 4.58303800  | -0.54617200 | -0.01618100 |
| C | 4.96044800  | -2.19238000 | 1.32729600  |
| H | 2.06490100  | -1.93851300 | -2.87216700 |
| H | 0.63342500  | -0.96203000 | -2.66349100 |

|   |             |             |             |
|---|-------------|-------------|-------------|
| C | 0.48430300  | -2.94961100 | -1.82163800 |
| H | -0.32338600 | -2.76178500 | -1.10835800 |
| H | 1.12129400  | -3.73086400 | -1.39878100 |
| H | 0.02661100  | -3.35716800 | -2.72709900 |
| C | -3.15852600 | 1.39556900  | 2.44052100  |
| H | -2.74804900 | 2.28857300  | 0.51282500  |
| H | -1.32332600 | 1.82812200  | 1.41064900  |
| H | -2.76800700 | 0.61548600  | 3.10269200  |
| H | -3.13229500 | 2.33967200  | 2.99199900  |
| H | -4.20849000 | 1.16593700  | 2.24041200  |
| C | 6.04806800  | -1.49488500 | 2.14928200  |
| H | 5.42887000  | -2.83404300 | 0.57113800  |
| H | 4.38353500  | -2.86119900 | 1.97757400  |
| H | 6.66416100  | -0.84483300 | 1.52002100  |
| H | 6.71269700  | -2.21924000 | 2.62800900  |
| H | 5.61171000  | -0.87372700 | 2.93794300  |
| H | 1.98130500  | 4.05533300  | -1.81442600 |
| H | 2.70108100  | 2.54589600  | -2.38359700 |
| H | 3.57571400  | 3.54865300  | -1.21575000 |
| H | 1.18515500  | 4.23449000  | 0.67960100  |
| H | 2.79931100  | 3.71073600  | 1.19688000  |
| H | 1.36444800  | 2.83505000  | 1.74745100  |

#### Structure 5

DEHBA\_Ncis\_C3H1\_radical

|   |             |             |             |
|---|-------------|-------------|-------------|
| C | -0.73583700 | 1.61820700  | -0.52402800 |
| N | -0.27068800 | 0.32792800  | -0.44596000 |
| O | -1.73426000 | 1.89354300  | -1.18133900 |
| C | 0.00447800  | 2.69682300  | 0.27040600  |
| H | 1.07450600  | 2.66739700  | 0.04314000  |
| H | -0.07919500 | 2.45388300  | 1.33798700  |
| C | -0.54109500 | 4.10348600  | 0.01663500  |
| H | -0.46170600 | 4.33136700  | -1.05013600 |
| C | 0.19204800  | 5.16789800  | 0.83775700  |
| H | -1.60972000 | 4.12009800  | 0.24355400  |
| H | 1.26092000  | 5.19373700  | 0.60073100  |
| H | 0.09731600  | 4.98041100  | 1.91254900  |
| H | -0.21299200 | 6.16409000  | 0.64049700  |
| C | 0.96878400  | -0.04869100 | 0.24450900  |
| C | -1.05608000 | -0.71113400 | -1.13514000 |
| H | -1.28738300 | -0.34574100 | -2.13623100 |
| C | -2.36705000 | -1.11367300 | -0.42335400 |
| H | -0.41685400 | -1.59132400 | -1.23986000 |
| C | -3.17385600 | -2.07578600 | -1.31943100 |
| H | -2.94565300 | -0.19504600 | -0.29574700 |
| C | -2.07483500 | -1.72591200 | 0.96103600  |
| H | -1.53429400 | -2.67197500 | 0.81327000  |
| C | -3.26803600 | -1.99755100 | 1.89794300  |
| H | -1.38575700 | -1.06251100 | 1.49614800  |
| H | -2.86442900 | -2.52155400 | 2.77171700  |
| H | -3.96882100 | -2.70258300 | 1.43602700  |
| C | -4.04298200 | -0.75664200 | 2.39182800  |
| H | -4.41889300 | -0.96242400 | 3.40022000  |
| C | -5.23368900 | -0.33271100 | 1.52213600  |
| H | -3.34791900 | 0.08520700  | 2.49965300  |
| H | -5.95824900 | -1.14851800 | 1.43142100  |
| H | -4.93140400 | -0.04388300 | 0.51348200  |
| H | -5.75414300 | 0.52184300  | 1.96444600  |
| H | 1.04843200  | 0.52101300  | 1.17397100  |
| C | 2.27546400  | 0.13519100  | -0.56590300 |
| H | 0.86385400  | -1.09420200 | 0.53970900  |
| H | 2.29409600  | 1.17744400  | -0.90947800 |

|   |             |             |             |
|---|-------------|-------------|-------------|
| C | 2.31046600  | -0.74453000 | -1.83052400 |
| C | 3.50713600  | -0.03723000 | 0.35464400  |
| H | 4.39441100  | 0.29377600  | -0.19234000 |
| C | 3.74995300  | -1.44875200 | 0.91243600  |
| H | 3.91231300  | -2.15363400 | 0.08820100  |
| H | 2.85429300  | -1.79756200 | 1.43805700  |
| C | 4.94053900  | -1.53874000 | 1.88236900  |
| H | 1.40739500  | -0.54195900 | -2.41358200 |
| H | 2.26006500  | -1.80315500 | -1.54883300 |
| C | 3.52957800  | -0.51274300 | -2.73030800 |
| H | 4.46436900  | -0.80248600 | -2.24347000 |
| H | 3.61556700  | 0.54122700  | -3.01405300 |
| H | 3.44690800  | -1.09552300 | -3.65171000 |
| C | -3.77086000 | -1.44394500 | -2.58344500 |
| H | -3.99192700 | -2.50181400 | -0.73129400 |
| H | -2.53439800 | -2.92552200 | -1.59662800 |
| H | -4.41485200 | -0.59648300 | -2.33171500 |
| H | -4.37618600 | -2.17297800 | -3.12992100 |
| H | -3.00461300 | -1.07655300 | -3.27009500 |
| C | 6.30902100  | -1.28504500 | 1.23980300  |
| H | 4.94324700  | -2.53594300 | 2.33642100  |
| H | 4.78723400  | -0.83140400 | 2.70692000  |
| H | 7.11382200  | -1.42062000 | 1.96757300  |
| H | 6.39598800  | -0.26958500 | 0.84435700  |
| H | 6.49026600  | -1.98043800 | 0.41356400  |

#### Structure 5

DEHiBA\_Ncis\_C3H1\_radical

|   |             |             |             |
|---|-------------|-------------|-------------|
| C | 0.49597200  | 2.02591200  | -0.75819800 |
| N | 0.09767200  | 0.72712900  | -0.53994800 |
| O | -0.26178800 | 2.85875500  | -1.24596200 |
| C | 1.91065300  | 2.45908300  | -0.34531200 |
| C | 2.58349500  | 3.19685300  | -1.51244100 |
| H | 2.52458600  | 1.59635200  | -0.08776500 |
| C | 1.80658100  | 3.36313600  | 0.89731600  |
| C | 0.95709900  | -0.32328900 | 0.02519500  |
| C | -1.28656200 | 0.36037900  | -0.87360900 |
| H | -1.66929300 | 1.13337200  | -1.54004300 |
| C | -2.23868700 | 0.20013700  | 0.33470200  |
| H | -1.26620600 | -0.58093200 | -1.42945600 |
| C | -2.33504400 | 1.50080600  | 1.15278300  |
| H | -1.82239400 | -0.57727500 | 0.99172100  |
| C | -3.61480900 | -0.30215500 | -0.17891500 |
| H | -4.30971200 | 0.54324000  | -0.21735500 |
| C | -4.22299600 | -1.45388100 | 0.63637600  |
| H | -3.51296800 | -0.64585100 | -1.21647000 |
| H | -4.35957200 | -1.14382700 | 1.67885300  |
| H | -3.50068100 | -2.27944600 | 0.65978000  |
| C | -5.55683600 | -1.98587900 | 0.08881500  |
| H | -5.42106100 | -2.28953000 | -0.95686300 |
| C | -6.72559700 | -0.99828400 | 0.18529100  |
| H | -5.81896600 | -2.89817300 | 0.63663200  |
| H | -6.55296900 | -0.09910400 | -0.41197100 |
| H | -6.88899300 | -0.68275300 | 1.22102000  |
| H | -7.65381000 | -1.45340400 | -0.17146800 |
| H | 1.49439900  | 0.07222800  | 0.88884700  |
| C | 1.96073800  | -0.97450800 | -0.95644100 |
| H | 0.29399200  | -1.09464600 | 0.42378900  |
| H | 2.56420400  | -0.16599400 | -1.38658200 |
| C | 1.28103000  | -1.68029600 | -2.15072700 |
| C | 2.92357900  | -1.91643000 | -0.20101500 |
| C | 4.00376100  | -1.21450000 | 0.63397200  |

|   |             |             |             |
|---|-------------|-------------|-------------|
| H | 3.42259700  | -2.56072300 | -0.93527400 |
| H | 3.54381000  | -0.57453700 | 1.39659200  |
| H | 4.58303800  | -0.54617200 | -0.01618100 |
| C | 4.96044800  | -2.19238000 | 1.32729600  |
| H | 2.06490100  | -1.93851300 | -2.87216700 |
| H | 0.63342500  | -0.96203000 | -2.66349100 |
| C | 0.48430300  | -2.94961100 | -1.82163800 |
| H | -0.32338600 | -2.76178500 | -1.10835800 |
| H | 1.12129400  | -3.73086400 | -1.39878100 |
| H | 0.02661100  | -3.35716800 | -2.72709900 |
| C | -3.15852600 | 1.39556900  | 2.44052100  |
| H | -2.74804900 | 2.28857300  | 0.51282500  |
| H | -1.32332600 | 1.82812200  | 1.41064900  |
| H | -2.76800700 | 0.61548600  | 3.10269200  |
| H | -3.13229500 | 2.33967200  | 2.99199900  |
| H | -4.20849000 | 1.16593700  | 2.24041200  |
| C | 6.04806800  | -1.49488500 | 2.14928200  |
| H | 5.42887000  | -2.83404300 | 0.57113800  |
| H | 4.38353500  | -2.86119900 | 1.97757400  |
| H | 6.66416100  | -0.84483300 | 1.52002100  |
| H | 6.71269700  | -2.21924000 | 2.62800900  |
| H | 5.61171000  | -0.87372700 | 2.93794300  |
| H | 1.98130500  | 4.05533300  | -1.81442600 |
| H | 2.70108100  | 2.54589600  | -2.38359700 |
| H | 3.57571400  | 3.54865300  | -1.21575000 |
| H | 1.18515500  | 4.23449000  | 0.67960100  |
| H | 2.79931100  | 3.71073600  | 1.19688000  |
| H | 1.36444800  | 2.83505000  | 1.74745100  |

#### Structure 6

DEHBA\_Ncis\_C3H2\_radical

|   |             |             |             |
|---|-------------|-------------|-------------|
| C | -0.73583700 | 1.61820700  | -0.52402800 |
| N | -0.27068800 | 0.32792800  | -0.44596000 |
| O | -1.73426000 | 1.89354300  | -1.18133900 |
| C | 0.00447800  | 2.69682300  | 0.27040600  |
| H | 1.07450600  | 2.66739700  | 0.04314000  |
| H | -0.07919500 | 2.45388300  | 1.33798700  |
| C | -0.54109500 | 4.10348600  | 0.01663500  |
| H | -0.46170600 | 4.33136700  | -1.05013600 |
| C | 0.19204800  | 5.16789800  | 0.83775700  |
| H | -1.60972000 | 4.12009800  | 0.24355400  |
| H | 1.26092000  | 5.19373700  | 0.60073100  |
| H | 0.09731600  | 4.98041100  | 1.91254900  |
| H | -0.21299200 | 6.16409000  | 0.64049700  |
| C | 0.96878400  | -0.04869100 | 0.24450900  |
| C | -1.05608000 | -0.71113400 | -1.13514000 |
| H | -1.28738300 | -0.34574100 | -2.13623100 |
| C | -2.36705000 | -1.11367300 | -0.42335400 |
| H | -0.41685400 | -1.59132400 | -1.23986000 |
| C | -3.17385600 | -2.07578600 | -1.31943100 |
| H | -2.94565300 | -0.19504600 | -0.29574700 |
| C | -2.07483500 | -1.72591200 | 0.96103600  |
| H | -1.53429400 | -2.67197500 | 0.81327000  |
| C | -3.26803600 | -1.99755100 | 1.89794300  |
| H | -1.38575700 | -1.06251100 | 1.49614800  |
| H | -2.86442900 | -2.52155400 | 2.77171700  |
| H | -3.96882100 | -2.70258300 | 1.43602700  |
| C | -4.04298200 | -0.75664200 | 2.39182800  |
| H | -4.41889300 | -0.96242400 | 3.40022000  |
| C | -5.23368900 | -0.33271100 | 1.52213600  |
| H | -3.34791900 | 0.08520700  | 2.49965300  |
| H | -5.95824900 | -1.14851800 | 1.43142100  |

|   |             |             |             |   |             |             |             |
|---|-------------|-------------|-------------|---|-------------|-------------|-------------|
| H | -4.93140400 | -0.04388300 | 0.51348200  | C | 1.96073800  | -0.97450800 | -0.95644100 |
| H | -5.75414300 | 0.52184300  | 1.96444600  | H | 0.29399200  | -1.09464600 | 0.42378900  |
| H | 1.04843200  | 0.52101300  | 1.17397100  | H | 2.56420400  | -0.16599400 | -1.38658200 |
| C | 2.27546400  | 0.13519100  | -0.56590300 | C | 1.28103000  | -1.68029600 | -2.15072700 |
| H | 0.86385400  | -1.09420200 | 0.53970900  | C | 2.92357900  | -1.91643000 | -0.20101500 |
| H | 2.29409600  | 1.17744400  | -0.90947800 | H | 2.34990800  | -2.59197800 | 0.44649400  |
| C | 2.31046600  | -0.74453000 | -1.83052400 | C | 4.00376100  | -1.21450000 | 0.63397200  |
| C | 3.50713600  | -0.03723000 | 0.35464400  | H | 3.54381000  | -0.57453700 | 1.39659200  |
| C | 3.74995300  | -1.44875200 | 0.91243600  | H | 4.58303800  | -0.54617200 | -0.01618100 |
| H | 3.40440900  | 0.65896700  | 1.19769600  | C | 4.96044800  | -2.19238000 | 1.32729600  |
| H | 3.91231300  | -2.15363400 | 0.08820100  | H | 2.06490100  | -1.93851300 | -2.87216700 |
| H | 2.85429300  | -1.79756200 | 1.43805700  | H | 0.63342500  | -0.96203000 | -2.66349100 |
| C | 4.94053900  | -1.53874000 | 1.88236900  | C | 0.48430300  | -2.94961100 | -1.82163800 |
| H | 1.40739500  | -0.54195900 | -2.41358200 | H | -0.32338600 | -2.76178500 | -1.10835800 |
| H | 2.26006500  | -1.80315500 | -1.54883300 | H | 1.12129400  | -3.73086400 | -1.39878100 |
| C | 3.52957800  | -0.51274300 | -2.73030800 | H | 0.02661100  | -3.35716800 | -2.72709900 |
| H | 4.46436900  | -0.80248600 | -2.24347000 | C | -3.15852600 | 1.39556900  | 2.44052100  |
| H | 3.61556700  | 0.54122700  | -3.01405300 | H | -2.74804900 | 2.28857300  | 0.51282500  |
| H | 3.44690800  | -1.09552300 | -3.65171000 | H | -1.32332600 | 1.82812200  | 1.41064900  |
| C | -3.77086000 | -1.44394500 | -2.58344500 | H | -2.76800700 | 0.61548600  | 3.10269200  |
| H | -3.99192700 | -2.50181400 | -0.73129400 | H | -3.13229500 | 2.33967200  | 2.99199900  |
| H | -2.53439800 | -2.92552200 | -1.59662800 | H | -4.20849000 | 1.16593700  | 2.24041200  |
| H | -4.41485200 | -0.59648300 | -2.33171500 | C | 6.04806800  | -1.49488500 | 2.14928200  |
| H | -4.37618600 | -2.17297800 | -3.12992100 | H | 5.42887000  | -2.83404300 | 0.57113800  |
| H | -3.00461300 | -1.07655300 | -3.27009500 | H | 4.38353500  | -2.86119900 | 1.97757400  |
| C | 6.30902100  | -1.28504500 | 1.23980300  | H | 6.66416100  | -0.84483300 | 1.52002100  |
| H | 4.94324700  | -2.53594300 | 2.33642100  | H | 6.71269700  | -2.21924000 | 2.62800900  |
| H | 4.78723400  | -0.83140400 | 2.70692000  | H | 5.61171000  | -0.87372700 | 2.93794300  |
| H | 7.11382200  | -1.42062000 | 1.96757300  | H | 1.98130500  | 4.05533300  | -1.81442600 |
| H | 6.39598800  | -0.26958500 | 0.84435700  | H | 2.70108100  | 2.54589600  | -2.38359700 |
| H | 6.49026600  | -1.98043800 | 0.41356400  | H | 3.57571400  | 3.54865300  | -1.21575000 |

### Structure 6

DEH/BA\_Ncis\_C3H2\_radical

|   |             |             |             |
|---|-------------|-------------|-------------|
| C | 0.49597200  | 2.02591200  | -0.75819800 |
| N | 0.09767200  | 0.72712900  | -0.53994800 |
| O | -0.26178800 | 2.85875500  | -1.24596200 |
| C | 1.91065300  | 2.45908300  | -0.34531200 |
| C | 2.58349500  | 3.19685300  | -1.51244100 |
| H | 2.52458600  | 1.59635200  | -0.08776500 |
| C | 1.80658100  | 3.36313600  | 0.89731600  |
| C | 0.95709900  | -0.32328900 | 0.02519500  |
| C | -1.28656200 | 0.36037900  | -0.87360900 |
| H | -1.66929300 | 1.13337200  | -1.54004300 |
| C | -2.23868700 | 0.20013700  | 0.33470200  |
| H | -1.26620600 | -0.58093200 | -1.42945600 |
| C | -2.33504400 | 1.50080600  | 1.15278300  |
| H | -1.82239400 | -0.57727500 | 0.99172100  |
| C | -3.61480900 | -0.30215500 | -0.17891500 |
| H | -4.30971200 | 0.54324000  | -0.21735500 |
| C | -4.22299600 | -1.45388100 | 0.63637600  |
| H | -3.51296800 | -0.64585100 | -1.21647000 |
| H | -4.35957200 | -1.14382700 | 1.67885300  |
| H | -3.50068100 | -2.27944600 | 0.65978000  |
| C | -5.55683600 | -1.98587900 | 0.08881500  |
| H | -5.42106100 | -2.28953000 | -0.95686300 |
| C | -6.72559700 | -0.99828400 | 0.18529100  |
| H | -5.81896600 | -2.89817300 | 0.63663200  |
| H | -6.55296900 | -0.09910400 | -0.41197100 |
| H | -6.88899300 | -0.68275300 | 1.22102000  |
| H | -7.65381000 | -1.45340400 | -0.17146800 |
| H | 1.49439900  | 0.07222800  | 0.88884700  |

### Structure 7

DEHBA\_Ncis\_C4H\_radical

|   |             |             |             |
|---|-------------|-------------|-------------|
| C | -0.73583700 | 1.61820700  | -0.52402800 |
| N | -0.27068800 | 0.32792800  | -0.44596000 |
| O | -1.73426000 | 1.89354300  | -1.18133900 |
| C | 0.00447800  | 2.69682300  | 0.27040600  |
| H | 1.07450600  | 2.66739700  | 0.04314000  |
| H | -0.07919500 | 2.45388300  | 1.33798700  |
| C | -0.54109500 | 4.10348600  | 0.01663500  |
| H | -0.46170600 | 4.33136700  | -1.05013600 |
| C | 0.19204800  | 5.16789800  | 0.83775700  |
| H | -1.60972000 | 4.12009800  | 0.24355400  |
| H | 1.26092000  | 5.19373700  | 0.60073100  |
| H | 0.09731600  | 4.98041100  | 1.91254900  |
| H | -0.21299200 | 6.16409000  | 0.64049700  |
| C | 0.96878400  | -0.04869100 | 0.24450900  |
| C | -1.05608000 | -0.71113400 | -1.13514000 |
| H | -1.28738300 | -0.34574100 | -2.13623100 |
| C | -2.36705000 | -1.11367300 | -0.42335400 |
| H | -0.41685400 | -1.59132400 | -1.23986000 |
| C | -3.17385600 | -2.07578600 | -1.31943100 |
| H | -2.94565300 | -0.19504600 | -0.29574700 |
| C | -2.07483500 | -1.72591200 | 0.96103600  |
| H | -1.53429400 | -2.67197500 | 0.81327000  |
| C | -3.26803600 | -1.99755100 | 1.89794300  |
| H | -1.38575700 | -1.06251100 | 1.49614800  |
| H | -2.86442900 | -2.52155400 | 2.77171700  |

|   |             |             |             |   |             |             |             |
|---|-------------|-------------|-------------|---|-------------|-------------|-------------|
| H | -3.96882100 | -2.70258300 | 1.43602700  | C | -6.72559700 | -0.99828400 | 0.18529100  |
| C | -4.04298200 | -0.75664200 | 2.39182800  | H | -5.81896600 | -2.89817300 | 0.63663200  |
| H | -4.41889300 | -0.96242400 | 3.40022000  | H | -6.55296900 | -0.09910400 | -0.41197100 |
| C | -5.23368900 | -0.33271100 | 1.52213600  | H | -6.88899300 | -0.68275300 | 1.22102000  |
| H | -3.34791900 | 0.08520700  | 2.49965300  | H | -7.65381000 | -1.45340400 | -0.17146800 |
| H | -5.95824900 | -1.14851800 | 1.43142100  | H | 1.49439900  | 0.07222800  | 0.88884700  |
| H | -4.93140400 | -0.04388300 | 0.51348200  | C | 1.96073800  | -0.97450800 | -0.95644100 |
| H | -5.75414300 | 0.52184300  | 1.96444600  | H | 0.29399200  | -1.09464600 | 0.42378900  |
| H | 1.04843200  | 0.52101300  | 1.17397100  | H | 2.56420400  | -0.16599400 | -1.38658200 |
| C | 2.27546400  | 0.13519100  | -0.56590300 | C | 1.28103000  | -1.68029600 | -2.15072700 |
| H | 0.86385400  | -1.09420200 | 0.53970900  | C | 2.92357900  | -1.91643000 | -0.20101500 |
| H | 2.29409600  | 1.17744400  | -0.90947800 | H | 2.34990800  | -2.59197800 | 0.44649400  |
| C | 2.31046600  | -0.74453000 | -1.83052400 | C | 4.00376100  | -1.21450000 | 0.63397200  |
| C | 3.50713600  | -0.03723000 | 0.35464400  | H | 3.42259700  | -2.56072300 | -0.93527400 |
| H | 4.39441100  | 0.29377600  | -0.19234000 | H | 4.58303800  | -0.54617200 | -0.01618100 |
| C | 3.74995300  | -1.44875200 | 0.91243600  | C | 4.96044800  | -2.19238000 | 1.32729600  |
| H | 3.40440900  | 0.65896700  | 1.19769600  | H | 2.06490100  | -1.93851300 | -2.87216700 |
| H | 3.91231300  | -2.15363400 | 0.08820100  | H | 0.63342500  | -0.96203000 | -2.66349100 |
| C | 4.94053900  | -1.53874000 | 1.88236900  | C | 0.48430300  | -2.94961100 | -1.82163800 |
| H | 1.40739500  | -0.54195900 | -2.41358200 | H | -0.32338600 | -2.76178500 | -1.10835800 |
| H | 2.26006500  | -1.80315500 | -1.54883300 | H | 1.12129400  | -3.73086400 | -1.39878100 |
| C | 3.52957800  | -0.51274300 | -2.73030800 | H | 0.02661100  | -3.35716800 | -2.72709900 |
| H | 4.46436900  | -0.80248600 | -2.24347000 | C | -3.15852600 | 1.39556900  | 2.44052100  |
| H | 3.61556700  | 0.54122700  | -3.01405300 | H | -2.74804900 | 2.28857300  | 0.51282500  |
| H | 3.44690800  | -1.09552300 | -3.65171000 | H | -1.32332600 | 1.82812200  | 1.41064900  |
| C | -3.77086000 | -1.44394500 | -2.58344500 | H | -2.76800700 | 0.61548600  | 3.10269200  |
| H | -3.99192700 | -2.50181400 | -0.73129400 | H | -3.13229500 | 2.33967200  | 2.99199900  |
| H | -2.53439800 | -2.92552200 | -1.59662800 | H | -4.20849000 | 1.16593700  | 2.24041200  |
| H | -4.41485200 | -0.59648300 | -2.33171500 | C | 6.04806800  | -1.49488500 | 2.14928200  |
| H | -4.37618600 | -2.17297800 | -3.12992100 | H | 5.42887000  | -2.83404300 | 0.57113800  |
| H | -3.00461300 | -1.07655300 | -3.27009500 | H | 4.38353500  | -2.86119900 | 1.97757400  |
| C | 6.30902100  | -1.28504500 | 1.23980300  | H | 6.66416100  | -0.84483300 | 1.52002100  |
| H | 4.94324700  | -2.53594300 | 2.33642100  | H | 6.71269700  | -2.21924000 | 2.62800900  |
| H | 4.78723400  | -0.83140400 | 2.70692000  | H | 5.61171000  | -0.87372700 | 2.93794300  |
| H | 7.11382200  | -1.42062000 | 1.96757300  | H | 1.98130500  | 4.05533300  | -1.81442600 |
| H | 6.39598800  | -0.26958500 | 0.84435700  | H | 2.70108100  | 2.54589600  | -2.38359700 |
| H | 6.49026600  | -1.98043800 | 0.41356400  | H | 3.57571400  | 3.54865300  | -1.21575000 |

### Structure 7

DEHiBA\_Ncis\_C4H\_radical

|   |             |             |             |
|---|-------------|-------------|-------------|
| C | 0.49597200  | 2.02591200  | -0.75819800 |
| N | 0.09767200  | 0.72712900  | -0.53994800 |
| O | -0.26178800 | 2.85875500  | -1.24596200 |
| C | 1.91065300  | 2.45908300  | -0.34531200 |
| C | 2.58349500  | 3.19685300  | -1.51244100 |
| H | 2.52458600  | 1.59635200  | -0.08776500 |
| C | 1.80658100  | 3.36313600  | 0.89731600  |
| C | 0.95709900  | -0.32328900 | 0.02519500  |
| C | -1.28656200 | 0.36037900  | -0.87360900 |
| H | -1.66929300 | 1.13337200  | -1.54004300 |
| C | -2.23868700 | 0.20013700  | 0.33470200  |
| H | -1.26620600 | -0.58093200 | -1.42945600 |
| C | -2.33504400 | 1.50080600  | 1.15278300  |
| H | -1.82239400 | -0.57727500 | 0.99172100  |
| C | -3.61480900 | -0.30215500 | -0.17891500 |
| H | -4.30971200 | 0.54324000  | -0.21735500 |
| C | -4.22299600 | -1.45388100 | 0.63637600  |
| H | -3.51296800 | -0.64585100 | -1.21647000 |
| H | -4.35957200 | -1.14382700 | 1.67885300  |
| H | -3.50068100 | -2.27944600 | 0.65978000  |
| C | -5.55683600 | -1.98587900 | 0.08881500  |
| H | -5.42106100 | -2.28953000 | -0.95686300 |

### Structure 8

DEHBA\_Ncis\_C5H\_radical

|   |             |             |             |
|---|-------------|-------------|-------------|
| C | -0.73583700 | 1.61820700  | -0.52402800 |
| N | -0.27068800 | 0.32792800  | -0.44596000 |
| O | -1.73426000 | 1.89354300  | -1.18133900 |
| C | 0.00447800  | 2.69682300  | 0.27040600  |
| H | 1.07450600  | 2.66739700  | 0.04314000  |
| H | -0.07919500 | 2.45388300  | 1.33798700  |
| C | -0.54109500 | 4.10348600  | 0.01663500  |
| H | -0.46170600 | 4.33136700  | -1.05013600 |
| C | 0.19204800  | 5.16789800  | 0.83775700  |
| H | -1.60972000 | 4.12009800  | 0.24355400  |
| H | 1.26092000  | 5.19373700  | 0.60073100  |
| H | 0.09731600  | 4.98041100  | 1.91254900  |
| H | -0.21299200 | 6.16409000  | 0.64049700  |
| C | 0.96878400  | -0.04869100 | 0.24450900  |
| C | -1.05608000 | -0.71113400 | -1.13514000 |
| H | -1.28738300 | -0.34574100 | -2.13623100 |
| C | -2.36705000 | -1.11367300 | -0.42335400 |
| H | -0.41685400 | -1.59132400 | -1.23986000 |
| C | -3.17385600 | -2.07578600 | -1.31943100 |



|   |             |             |             |   |             |             |             |
|---|-------------|-------------|-------------|---|-------------|-------------|-------------|
| H | -2.94565300 | -0.19504600 | -0.29574700 | C | -4.22299600 | -1.45388100 | 0.63637600  |
| C | -2.07483500 | -1.72591200 | 0.96103600  | H | -3.51296800 | -0.64585100 | -1.21647000 |
| H | -1.53429400 | -2.67197500 | 0.81327000  | H | -4.35957200 | -1.14382700 | 1.67885300  |
| C | -3.26803600 | -1.99755100 | 1.89794300  | H | -3.50068100 | -2.27944600 | 0.65978000  |
| H | -1.38575700 | -1.06251100 | 1.49614800  | C | -5.55683600 | -1.98587900 | 0.08881500  |
| H | -2.86442900 | -2.52155400 | 2.77171700  | H | -5.42106100 | -2.28953000 | -0.95686300 |
| H | -3.96882100 | -2.70258300 | 1.43602700  | C | -6.72559700 | -0.99828400 | 0.18529100  |
| C | -4.04298200 | -0.75664200 | 2.39182800  | H | -5.81896600 | -2.89817300 | 0.63663200  |
| H | -4.41889300 | -0.96242400 | 3.40022000  | H | -6.55296900 | -0.09910400 | -0.41197100 |
| C | -5.23368900 | -0.33271100 | 1.52213600  | H | -6.88899300 | -0.68275300 | 1.22102000  |
| H | -3.34791900 | 0.08520700  | 2.49965300  | H | -7.65381000 | -1.45340400 | -0.17146800 |
| H | -5.95824900 | -1.14851800 | 1.43142100  | H | 1.49439900  | 0.07222800  | 0.88884700  |
| H | -4.93140400 | -0.04388300 | 0.51348200  | C | 1.96073800  | -0.97450800 | -0.95644100 |
| H | -5.75414300 | 0.52184300  | 1.96444600  | H | 0.29399200  | -1.09464600 | 0.42378900  |
| H | 1.04843200  | 0.52101300  | 1.17397100  | H | 2.56420400  | -0.16599400 | -1.38658200 |
| C | 2.27546400  | 0.13519100  | -0.56590300 | C | 1.28103000  | -1.68029600 | -2.15072700 |
| H | 0.86385400  | -1.09420200 | 0.53970900  | C | 2.92357900  | -1.91643000 | -0.20101500 |
| H | 2.29409600  | 1.17744400  | -0.90947800 | H | 2.34990800  | -2.59197800 | 0.44649400  |
| C | 2.31046600  | -0.74453000 | -1.83052400 | C | 4.00376100  | -1.21450000 | 0.63397200  |
| C | 3.50713600  | -0.03723000 | 0.35464400  | H | 3.42259700  | -2.56072300 | -0.93527400 |
| H | 4.39441100  | 0.29377600  | -0.19234000 | H | 3.54381000  | -0.57453700 | 1.39659200  |
| C | 3.74995300  | -1.44875200 | 0.91243600  | H | 4.58303800  | -0.54617200 | -0.01618100 |
| H | 3.40440900  | 0.65896700  | 1.19769600  | C | 4.96044800  | -2.19238000 | 1.32729600  |
| H | 3.91231300  | -2.15363400 | 0.08820100  | H | 2.06490100  | -1.93851300 | -2.87216700 |
| H | 2.85429300  | -1.79756200 | 1.43805700  | H | 0.63342500  | -0.96203000 | -2.66349100 |
| C | 4.94053900  | -1.53874000 | 1.88236900  | C | 0.48430300  | -2.94961100 | -1.82163800 |
| H | 1.40739500  | -0.54195900 | -2.41358200 | H | -0.32338600 | -2.76178500 | -1.10835800 |
| H | 2.26006500  | -1.80315500 | -1.54883300 | H | 1.12129400  | -3.73086400 | -1.39878100 |
| C | 3.52957800  | -0.51274300 | -2.73030800 | H | 0.02661100  | -3.35716800 | -2.72709900 |
| H | 4.46436900  | -0.80248600 | -2.24347000 | C | -3.15852600 | 1.39556900  | 2.44052100  |
| H | 3.61556700  | 0.54122700  | -3.01405300 | H | -2.74804900 | 2.28857300  | 0.51282500  |
| H | 3.44690800  | -1.09552300 | -3.65171000 | H | -1.32332600 | 1.82812200  | 1.41064900  |
| C | -3.77086000 | -1.44394500 | -2.58344500 | H | -2.76800700 | 0.61548600  | 3.10269200  |
| H | -3.99192700 | -2.50181400 | -0.73129400 | H | -3.13229500 | 2.33967200  | 2.99199900  |
| H | -2.53439800 | -2.92552200 | -1.59662800 | H | -4.20849000 | 1.16593700  | 2.24041200  |
| H | -4.41485200 | -0.59648300 | -2.33171500 | C | 6.04806800  | -1.49488500 | 2.14928200  |
| H | -4.37618600 | -2.17297800 | -3.12992100 | H | 5.42887000  | -2.83404300 | 0.57113800  |
| H | -3.00461300 | -1.07655300 | -3.27009500 | H | 6.66416100  | -0.84483300 | 1.52002100  |
| C | 6.30902100  | -1.28504500 | 1.23980300  | H | 6.71269700  | -2.21924000 | 2.62800900  |
| H | 4.94324700  | -2.53594300 | 2.33642100  | H | 5.61171000  | -0.87372700 | 2.93794300  |
| H | 7.11382200  | -1.42062000 | 1.96757300  | H | 1.98130500  | 4.05533300  | -1.81442600 |
| H | 6.39598800  | -0.26958500 | 0.84435700  | H | 2.70108100  | 2.54589600  | -2.38359700 |
| H | 6.49026600  | -1.98043800 | 0.41356400  | H | 3.57571400  | 3.54865300  | -1.21575000 |

### Structure 8

DEHiBA\_Ncis\_C5H\_radical

|   |             |             |             |
|---|-------------|-------------|-------------|
| C | 0.49597200  | 2.02591200  | -0.75819800 |
| N | 0.09767200  | 0.72712900  | -0.53994800 |
| O | -0.26178800 | 2.85875500  | -1.24596200 |
| C | 1.91065300  | 2.45908300  | -0.34531200 |
| C | 2.58349500  | 3.19685300  | -1.51244100 |
| H | 2.52458600  | 1.59635200  | -0.08776500 |
| C | 1.80658100  | 3.36313600  | 0.89731600  |
| C | 0.95709900  | -0.32328900 | 0.02519500  |
| C | -1.28656200 | 0.36037900  | -0.87360900 |
| H | -1.66929300 | 1.13337200  | -1.54004300 |
| C | -2.23868700 | 0.20013700  | 0.33470200  |
| H | -1.26620600 | -0.58093200 | -1.42945600 |
| C | -2.33504400 | 1.50080600  | 1.15278300  |
| H | -1.82239400 | -0.57727500 | 0.99172100  |
| C | -3.61480900 | -0.30215500 | -0.17891500 |
| H | -4.30971200 | 0.54324000  | -0.21735500 |

### Structure 9

DEHBA\_Ncis\_C6H\_radical

|   |             |            |             |
|---|-------------|------------|-------------|
| C | -0.73583700 | 1.61820700 | -0.52402800 |
| N | -0.27068800 | 0.32792800 | -0.44596000 |
| O | -1.73426000 | 1.89354300 | -1.18133900 |
| C | 0.00447800  | 2.69682300 | 0.27040600  |
| H | 1.07450600  | 2.66739700 | 0.04314000  |
| H | -0.07919500 | 2.45388300 | 1.33798700  |
| C | -0.54109500 | 4.10348600 | 0.01663500  |
| H | -0.46170600 | 4.33136700 | -1.05013600 |
| C | 0.19204800  | 5.16789800 | 0.83775700  |
| H | -1.60972000 | 4.12009800 | 0.24355400  |
| H | 1.26092000  | 5.19373700 | 0.60073100  |
| H | 0.09731600  | 4.98041100 | 1.91254900  |
| H | -0.21299200 | 6.16409000 | 0.64049700  |

|   |             |             |             |   |             |             |             |
|---|-------------|-------------|-------------|---|-------------|-------------|-------------|
| C | 0.96878400  | -0.04869100 | 0.24450900  | C | -2.23868700 | 0.20013700  | 0.33470200  |
| C | -1.05608000 | -0.71113400 | -1.13514000 | H | -1.26620600 | -0.58093200 | -1.42945600 |
| H | -1.28738300 | -0.34574100 | -2.13623100 | C | -2.33504400 | 1.50080600  | 1.15278300  |
| C | -2.36705000 | -1.11367300 | -0.42335400 | H | -1.82239400 | -0.57727500 | 0.99172100  |
| H | -0.41685400 | -1.59132400 | -1.23986000 | C | -3.61480900 | -0.30215500 | -0.17891500 |
| C | -3.17385600 | -2.07578600 | -1.31943100 | H | -4.30971200 | 0.54324000  | -0.21735500 |
| H | -2.94565300 | -0.19504600 | -0.29574700 | C | -4.22299600 | -1.45388100 | 0.63637600  |
| C | -2.07483500 | -1.72591200 | 0.96103600  | H | -3.51296800 | -0.64585100 | -1.21647000 |
| H | -1.53429400 | -2.67197500 | 0.81327000  | H | -4.35957200 | -1.14382700 | 1.67885300  |
| C | -3.26803600 | -1.99755100 | 1.89794300  | H | -3.50068100 | -2.27944600 | 0.65978000  |
| H | -1.38575700 | -1.06251100 | 1.49614800  | C | -5.55683600 | -1.98587900 | 0.08881500  |
| H | -2.86442900 | -2.52155400 | 2.77171700  | H | -5.42106100 | -2.28953000 | -0.95686300 |
| H | -3.96882100 | -2.70258300 | 1.43602700  | C | -6.72559700 | -0.99828400 | 0.18529100  |
| C | -4.04298200 | -0.75664200 | 2.39182800  | H | -5.81896600 | -2.89817300 | 0.63663200  |
| H | -4.41889300 | -0.96242400 | 3.40022000  | H | -6.55296900 | -0.09910400 | -0.41197100 |
| C | -5.23368900 | -0.33271100 | 1.52213600  | H | -6.88899300 | -0.68275300 | 1.22102000  |
| H | -3.34791900 | 0.08520700  | 2.49965300  | H | -7.65381000 | -1.45340400 | -0.17146800 |
| H | -5.95824900 | -1.14851800 | 1.43142100  | H | 1.49439900  | 0.07222800  | 0.88884700  |
| H | -4.93140400 | -0.04388300 | 0.51348200  | C | 1.96073800  | -0.97450800 | -0.95644100 |
| H | -5.75414300 | 0.52184300  | 1.96444600  | H | 0.29399200  | -1.09464600 | 0.42378900  |
| H | 1.04843200  | 0.52101300  | 1.17397100  | H | 2.56420400  | -0.16599400 | -1.38658200 |
| C | 2.27546400  | 0.13519100  | -0.56590300 | C | 1.28103000  | -1.68029600 | -2.15072700 |
| H | 0.86385400  | -1.09420200 | 0.53970900  | C | 2.92357900  | -1.91643000 | -0.20101500 |
| H | 2.29409600  | 1.17744400  | -0.90947800 | H | 2.34990800  | -2.59197800 | 0.44649400  |
| C | 2.31046600  | -0.74453000 | -1.83052400 | C | 4.00376100  | -1.21450000 | 0.63397200  |
| C | 3.50713600  | -0.03723000 | 0.35464400  | H | 3.42259700  | -2.56072300 | -0.93527400 |
| H | 4.39441100  | 0.29377600  | -0.19234000 | H | 3.54381000  | -0.57453700 | 1.39659200  |
| C | 3.74995300  | -1.44875200 | 0.91243600  | H | 4.58303800  | -0.54617200 | -0.01618100 |
| H | 3.40440900  | 0.65896700  | 1.19769600  | C | 4.96044800  | -2.19238000 | 1.32729600  |
| H | 3.91231300  | -2.15363400 | 0.08820100  | H | 2.06490100  | -1.93851300 | -2.87216700 |
| H | 2.85429300  | -1.79756200 | 1.43805700  | H | 0.63342500  | -0.96203000 | -2.66349100 |
| C | 4.94053900  | -1.53874000 | 1.88236900  | C | 0.48430300  | -2.94961100 | -1.82163800 |
| H | 1.40739500  | -0.54195900 | -2.41358200 | H | -0.32338600 | -2.76178500 | -1.10835800 |
| H | 2.26006500  | -1.80315500 | -1.54883300 | H | 1.12129400  | -3.73086400 | -1.39878100 |
| C | 3.52957800  | -0.51274300 | -2.73030800 | H | 0.02661100  | -3.35716800 | -2.72709900 |
| H | 4.46436900  | -0.80248600 | -2.24347000 | C | -3.15852600 | 1.39556900  | 2.44052100  |
| H | 3.61556700  | 0.54122700  | -3.01405300 | H | -2.74804900 | 2.28857300  | 0.51282500  |
| H | 3.44690800  | -1.09552300 | -3.65171000 | H | -1.32332600 | 1.82812200  | 1.41064900  |
| C | -3.77086000 | -1.44394500 | -2.58344500 | H | -2.76800700 | 0.61548600  | 3.10269200  |
| H | -3.99192700 | -2.50181400 | -0.73129400 | H | -3.13229500 | 2.33967200  | 2.99199900  |
| H | -2.53439800 | -2.92552200 | -1.59662800 | H | -4.20849000 | 1.16593700  | 2.24041200  |
| H | -4.41485200 | -0.59648300 | -2.33171500 | C | 6.04806800  | -1.49488500 | 2.14928200  |
| H | -4.37618600 | -2.17297800 | -3.12992100 | H | 5.42887000  | -2.83404300 | 0.57113800  |
| H | -3.00461300 | -1.07655300 | -3.27009500 | H | 4.38353500  | -2.86119900 | 1.97757400  |
| C | 6.30902100  | -1.28504500 | 1.23980300  | H | 6.66416100  | -0.84483300 | 1.52002100  |
| H | 4.94324700  | -2.53594300 | 2.33642100  | H | 6.71269700  | -2.21924000 | 2.62800900  |
| H | 4.78723400  | -0.83140400 | 2.70692000  | H | 1.98130500  | 4.05533300  | -1.81442600 |
| H | 7.11382200  | -1.42062000 | 1.96757300  | H | 2.70108100  | 2.54589600  | -2.38359700 |
| H | 6.49026600  | -1.98043800 | 0.41356400  | H | 3.57571400  | 3.54865300  | -1.21575000 |
|   |             |             |             | H | 1.18515500  | 4.23449000  | 0.67960100  |
|   |             |             |             | H | 2.79931100  | 3.71073600  | 1.19688000  |
|   |             |             |             | H | 1.36444800  | 2.83505000  | 1.74745100  |

### Structure 9

DEHiBA\_Ncis\_C6H\_radical

|   |             |             |             |
|---|-------------|-------------|-------------|
| C | 0.49597200  | 2.02591200  | -0.75819800 |
| N | 0.09767200  | 0.72712900  | -0.53994800 |
| O | -0.26178800 | 2.85875500  | -1.24596200 |
| C | 1.91065300  | 2.45908300  | -0.34531200 |
| C | 2.58349500  | 3.19685300  | -1.51244100 |
| H | 2.52458600  | 1.59635200  | -0.08776500 |
| C | 1.80658100  | 3.36313600  | 0.89731600  |
| C | 0.95709900  | -0.32328900 | 0.02519500  |
| C | -1.28656200 | 0.36037900  | -0.87360900 |
| H | -1.66929300 | 1.13337200  | -1.54004300 |

### Structure 10

DEHBA\_Ntrans\_C1H1\_radical

|   |             |            |             |
|---|-------------|------------|-------------|
| C | -0.73583700 | 1.61820700 | -0.52402800 |
| N | -0.27068800 | 0.32792800 | -0.44596000 |
| O | -1.73426000 | 1.89354300 | -1.18133900 |
| C | 0.00447800  | 2.69682300 | 0.27040600  |
| H | 1.07450600  | 2.66739700 | 0.04314000  |
| H | -0.07919500 | 2.45388300 | 1.33798700  |
| C | -0.54109500 | 4.10348600 | 0.01663500  |

|   |             |             |             |   |             |             |             |
|---|-------------|-------------|-------------|---|-------------|-------------|-------------|
| H | -0.46170600 | 4.33136700  | -1.05013600 | C | 2.58349500  | 3.19685300  | -1.51244100 |
| C | 0.19204800  | 5.16789800  | 0.83775700  | H | 2.52458600  | 1.59635200  | -0.08776500 |
| H | -1.60972000 | 4.12009800  | 0.24355400  | C | 1.80658100  | 3.36313600  | 0.89731600  |
| H | 1.26092000  | 5.19373700  | 0.60073100  | C | 0.95709900  | -0.32328900 | 0.02519500  |
| H | 0.09731600  | 4.98041100  | 1.91254900  | C | -1.28656200 | 0.36037900  | -0.87360900 |
| H | -0.21299200 | 6.16409000  | 0.64049700  | C | -2.23868700 | 0.20013700  | 0.33470200  |
| C | 0.96878400  | -0.04869100 | 0.24450900  | H | -1.26620600 | -0.58093200 | -1.42945600 |
| C | -1.05608000 | -0.71113400 | -1.13514000 | C | -2.33504400 | 1.50080600  | 1.15278300  |
| C | -2.36705000 | -1.11367300 | -0.42335400 | H | -1.82239400 | -0.57727500 | 0.99172100  |
| H | -0.41685400 | -1.59132400 | -1.23986000 | C | -3.61480900 | -0.30215500 | -0.17891500 |
| C | -3.17385600 | -2.07578600 | -1.31943100 | H | -4.30971200 | 0.54324000  | -0.21735500 |
| H | -2.94565300 | -0.19504600 | -0.29574700 | C | -4.22299600 | -1.45388100 | 0.63637600  |
| C | -2.07483500 | -1.72591200 | 0.96103600  | H | -3.51296800 | -0.64585100 | -1.21647000 |
| H | -1.53429400 | -2.67197500 | 0.81327000  | H | -4.35957200 | -1.14382700 | 1.67885300  |
| C | -3.26803600 | -1.99755100 | 1.89794300  | H | -3.50068100 | -2.27944600 | 0.65978000  |
| H | -1.38575700 | -1.06251100 | 1.49614800  | C | -5.55683600 | -1.98587900 | 0.08881500  |
| H | -2.86442900 | -2.52155400 | 2.77171700  | H | -5.42106100 | -2.28953000 | -0.95686300 |
| H | -3.96882100 | -2.70258300 | 1.43602700  | C | -6.72559700 | -0.99828400 | 0.18529100  |
| C | -4.04298200 | -0.75664200 | 2.39182800  | H | -5.81896600 | -2.89817300 | 0.63663200  |
| H | -4.41889300 | -0.96242400 | 3.40022000  | H | -6.55296900 | -0.09910400 | -0.41197100 |
| C | -5.23368900 | -0.33271100 | 1.52213600  | H | -6.88899300 | -0.68275300 | 1.22102000  |
| H | -3.34791900 | 0.08520700  | 2.49965300  | H | -7.65381000 | -1.45340400 | -0.17146800 |
| H | -5.95824900 | -1.14851800 | 1.43142100  | H | 1.49439900  | 0.07222800  | 0.88884700  |
| H | -4.93140400 | -0.04388300 | 0.51348200  | C | 1.96073800  | -0.97450800 | -0.95644100 |
| H | -5.75414300 | 0.52184300  | 1.96444600  | H | 0.29399200  | -1.09464600 | 0.42378900  |
| H | 1.04843200  | 0.52101300  | 1.17397100  | C | 2.56420400  | -0.16599400 | -1.38658200 |
| C | 2.27546400  | 0.13519100  | -0.56590300 | H | 1.28103000  | -1.68029600 | -2.15072700 |
| H | 0.86385400  | -1.09420200 | 0.53970900  | C | 2.92357900  | -1.91643000 | -0.20101500 |
| H | 2.29409600  | 1.17744400  | -0.90947800 | H | 2.34990800  | -2.59197800 | 0.44649400  |
| C | 2.31046600  | -0.74453000 | -1.83052400 | C | 4.00376100  | -1.21450000 | 0.63397200  |
| C | 3.50713600  | -0.03723000 | 0.35464400  | H | 3.42259700  | -2.56072300 | -0.93527400 |
| H | 4.39441100  | 0.29377600  | -0.19234000 | H | 3.54381000  | -0.57453700 | 1.39659200  |
| C | 3.74995300  | -1.44875200 | 0.91243600  | H | 4.58303800  | -0.54617200 | -0.01618100 |
| H | 3.40440900  | 0.65896700  | 1.19769600  | C | 4.96044800  | -2.19238000 | 1.32729600  |
| H | 3.91231300  | -2.15363400 | 0.08820100  | H | 2.06490100  | -1.93851300 | -2.87216700 |
| H | 2.85429300  | -1.79756200 | 1.43805700  | H | 0.63342500  | -0.96203000 | -2.66349100 |
| C | 4.94053900  | -1.53874000 | 1.88236900  | C | 0.48430300  | -2.94961100 | -1.82163800 |
| H | 1.40739500  | -0.54195900 | -2.41358200 | H | -0.32338600 | -2.76178500 | -1.10835800 |
| H | 2.26006500  | -1.80315500 | -1.54883300 | H | 1.12129400  | -3.73086400 | -1.39878100 |
| C | 3.52957800  | -0.51274300 | -2.73030800 | C | 0.02661100  | -3.35716800 | -2.72709900 |
| H | 4.46436900  | -0.80248600 | -2.24347000 | H | -3.15852600 | 1.39556900  | 2.44052100  |
| H | 3.61556700  | 0.54122700  | -3.01405300 | H | -2.74804900 | 2.28857300  | 0.51282500  |
| H | 3.44690800  | -1.09552300 | -3.65171000 | H | -1.32332600 | 1.82812200  | 1.41064900  |
| C | -3.77086000 | -1.44394500 | -2.58344500 | H | -2.76800700 | 0.61548600  | 3.10269200  |
| H | -3.99192700 | -2.50181400 | -0.73129400 | H | -3.13229500 | 2.33967200  | 2.99199900  |
| H | -2.53439800 | -2.92552200 | -1.59662800 | H | -4.20849000 | 1.16593700  | 2.24041200  |
| H | -4.41485200 | -0.59648300 | -2.33171500 | C | 6.04806800  | -1.49488500 | 2.14928200  |
| H | -4.37618600 | -2.17297800 | -3.12992100 | H | 5.42887000  | -2.83404300 | 0.57113800  |
| H | -3.00461300 | -1.07655300 | -3.27009500 | H | 4.38353500  | -2.86119900 | 1.97757400  |
| C | 6.30902100  | -1.28504500 | 1.23980300  | H | 6.66416100  | -0.84483300 | 1.52002100  |
| H | 4.94324700  | -2.53594300 | 2.33642100  | H | 6.71269700  | -2.21924000 | 2.62800900  |
| H | 4.78723400  | -0.83140400 | 2.70692000  | H | 5.61171000  | -0.87372700 | 2.93794300  |
| H | 7.11382200  | -1.42062000 | 1.96757300  | H | 1.98130500  | 4.05533300  | -1.81442600 |
| H | 6.39598800  | -0.26958500 | 0.84435700  | H | 2.70108100  | 2.54589600  | -2.38359700 |
| H | 6.49026600  | -1.98043800 | 0.41356400  | H | 3.57571400  | 3.54865300  | -1.21575000 |
|   |             |             |             | H | 1.18515500  | 4.23449000  | 0.67960100  |
|   |             |             |             | H | 2.79931100  | 3.71073600  | 1.19688000  |
|   |             |             |             | H | 1.36444800  | 2.83505000  | 1.74745100  |

### Structure 10

DEHiBA\_Ntrans\_C1H1\_radical

|   |             |            |             |
|---|-------------|------------|-------------|
| C | 0.49597200  | 2.02591200 | -0.75819800 |
| N | 0.09767200  | 0.72712900 | -0.53994800 |
| O | -0.26178800 | 2.85875500 | -1.24596200 |
| C | 1.91065300  | 2.45908300 | -0.34531200 |

### Structure 11

DEHBA\_Ntrans\_C1H2\_radical

|   |             |            |             |
|---|-------------|------------|-------------|
| C | -0.73583700 | 1.61820700 | -0.52402800 |
|---|-------------|------------|-------------|

|   |             |             |             |
|---|-------------|-------------|-------------|
| N | -0.27068800 | 0.32792800  | -0.44596000 |
| O | -1.73426000 | 1.89354300  | -1.18133900 |
| C | 0.00447800  | 2.69682300  | 0.27040600  |
| H | 1.07450600  | 2.66739700  | 0.04314000  |
| H | -0.07919500 | 2.45388300  | 1.33798700  |
| C | -0.54109500 | 4.10348600  | 0.01663500  |
| H | -0.46170600 | 4.33136700  | -1.05013600 |
| C | 0.19204800  | 5.16789800  | 0.83775700  |
| H | -1.60972000 | 4.12009800  | 0.24355400  |
| H | 1.26092000  | 5.19373700  | 0.60073100  |
| H | 0.09731600  | 4.98041100  | 1.91254900  |
| H | -0.21299200 | 6.16409000  | 0.64049700  |
| C | 0.96878400  | -0.04869100 | 0.24450900  |
| C | -1.05608000 | -0.71113400 | -1.13514000 |
| H | -1.28738300 | -0.34574100 | -2.13623100 |
| C | -2.36705000 | -1.11367300 | -0.42335400 |
| C | -3.17385600 | -2.07578600 | -1.31943100 |
| H | -2.94565300 | -0.19504600 | -0.29574700 |
| C | -2.07483500 | -1.72591200 | 0.96103600  |
| H | -1.53429400 | -2.67197500 | 0.81327000  |
| C | -3.26803600 | -1.99755100 | 1.89794300  |
| H | -1.38575700 | -1.06251100 | 1.49614800  |
| H | -2.86442900 | -2.52155400 | 2.77171700  |
| H | -3.96882100 | -2.70258300 | 1.43602700  |
| C | -4.04298200 | -0.75664200 | 2.39182800  |
| H | -4.41889300 | -0.96242400 | 3.40022000  |
| C | -5.23368900 | -0.33271100 | 1.52213600  |
| H | -3.34791900 | 0.08520700  | 2.49965300  |
| H | -5.95824900 | -1.14851800 | 1.43142100  |
| H | -4.93140400 | -0.04388300 | 0.51348200  |
| H | -5.75414300 | 0.52184300  | 1.96444600  |
| H | 1.04843200  | 0.52101300  | 1.17397100  |
| C | 2.27546400  | 0.13519100  | -0.56590300 |
| H | 0.86385400  | -1.09420200 | 0.53970900  |
| H | 2.29409600  | 1.17744400  | -0.90947800 |
| C | 2.31046600  | -0.74453000 | -1.83052400 |
| C | 3.50713600  | -0.03723000 | 0.35464400  |
| H | 4.39441100  | 0.29377600  | -0.19234000 |
| C | 3.74995300  | -1.44875200 | 0.91243600  |
| H | 3.40440900  | 0.65896700  | 1.19769600  |
| H | 3.91231300  | -2.15363400 | 0.08820100  |
| H | 2.85429300  | -1.79756200 | 1.43805700  |
| C | 4.94053900  | -1.53874000 | 1.88236900  |
| H | 1.40739500  | -0.54195900 | -2.41358200 |
| H | 2.26006500  | -1.80315500 | -1.54883300 |
| C | 3.52957800  | -0.51274300 | -2.73030800 |
| H | 4.46436900  | -0.80248600 | -2.24347000 |
| H | 3.61556700  | 0.54122700  | -3.01405300 |
| H | 3.44690800  | -1.09552300 | -3.65171000 |
| C | -3.77086000 | -1.44394500 | -2.58344500 |
| H | -3.99192700 | -2.50181400 | -0.73129400 |
| H | -2.53439800 | -2.92552200 | -1.59662800 |
| H | -4.41485200 | -0.59648300 | -2.33171500 |
| H | -4.37618600 | -2.17297800 | -3.12992100 |
| H | -3.00461300 | -1.07655300 | -3.27009500 |
| C | 6.30902100  | -1.28504500 | 1.23980300  |
| H | 4.94324700  | -2.53594300 | 2.33642100  |
| H | 4.78723400  | -0.83140400 | 2.70692000  |
| H | 7.11382200  | -1.42062000 | 1.96757300  |
| H | 6.39598800  | -0.26958500 | 0.84435700  |
| H | 6.49026600  | -1.98043800 | 0.41356400  |

### Structure 11

| DEH/BA_Ntrans_C1H2_radical |             |             |             |
|----------------------------|-------------|-------------|-------------|
| C                          | 0.49597200  | 2.02591200  | -0.75819800 |
| N                          | 0.09767200  | 0.72712900  | -0.53994800 |
| O                          | -0.26178800 | 2.85875500  | -1.24596200 |
| C                          | 1.91065300  | 2.45908300  | -0.34531200 |
| C                          | 2.58349500  | 3.19685300  | -1.51244100 |
| H                          | 2.52458600  | 1.59635200  | -0.08776500 |
| C                          | 1.80658100  | 3.36313600  | 0.89731600  |
| C                          | 0.95709900  | -0.32328900 | 0.02519500  |
| C                          | -1.28656200 | 0.36037900  | -0.87360900 |
| H                          | -1.66929300 | 1.13337200  | -1.54004300 |
| C                          | -2.23868700 | 0.20013700  | 0.33470200  |
| C                          | -2.33504400 | 1.50080600  | 1.15278300  |
| H                          | -1.82239400 | -0.57727500 | 0.99172100  |
| C                          | -3.61480900 | -0.30215500 | -0.17891500 |
| H                          | -4.30971200 | 0.54324000  | -0.21735500 |
| C                          | -4.22299600 | -1.45388100 | 0.63637600  |
| H                          | -3.51296800 | -0.64585100 | -1.21647000 |
| H                          | -4.35957200 | -1.14382700 | 1.67885300  |
| H                          | -3.50068100 | -2.27944600 | 0.65978000  |
| C                          | -5.55683600 | -1.98587900 | 0.08881500  |
| H                          | -5.42106100 | -2.28953000 | -0.95686300 |
| C                          | -6.72559700 | -0.99828400 | 0.18529100  |
| H                          | -5.81896600 | -2.89817300 | 0.63663200  |
| H                          | -6.55296900 | -0.09910400 | -0.41197100 |
| H                          | -6.88899300 | -0.68275300 | 1.22102000  |
| H                          | -7.65381000 | -1.45340400 | -0.17146800 |
| H                          | 1.49439900  | 0.07222800  | 0.88884700  |
| C                          | 1.96073800  | -0.97450800 | -0.95644100 |
| H                          | 0.29399200  | -1.09464600 | 0.42378900  |
| H                          | 2.56420400  | -0.16599400 | -1.38658200 |
| C                          | 1.28103000  | -1.68029600 | -2.15072700 |
| C                          | 2.92357900  | -1.91643000 | -0.20101500 |
| H                          | 2.34990800  | -2.59197800 | 0.44649400  |
| C                          | 4.00376100  | -1.21450000 | 0.63397200  |
| H                          | 3.42259700  | -2.56072300 | -0.93527400 |
| H                          | 3.54381000  | -0.57453700 | 1.39659200  |
| H                          | 4.58303800  | -0.54617200 | -0.01618100 |
| C                          | 4.96044800  | -2.19238000 | 1.32729600  |
| H                          | 2.06490100  | -1.93851300 | -2.87216700 |
| H                          | 0.63342500  | -0.96203000 | -2.66349100 |
| C                          | 0.48430300  | -2.94961100 | -1.82163800 |
| H                          | -0.32338600 | -2.76178500 | -1.10835800 |
| H                          | 1.12129400  | -3.73086400 | -1.39878100 |
| H                          | 0.02661100  | -3.35716800 | -2.72709900 |
| C                          | -3.15852600 | 1.39556900  | 2.44052100  |
| H                          | -2.74804900 | 2.28857300  | 0.51282500  |
| H                          | -1.32332600 | 1.82812200  | 1.41064900  |
| H                          | -2.76800700 | 0.61548600  | 3.10269200  |
| H                          | -3.13229500 | 2.33967200  | 2.99199900  |
| H                          | -4.20849000 | 1.16593700  | 2.24041200  |
| C                          | 6.04806800  | -1.49488500 | 2.14928200  |
| H                          | 5.42887000  | -2.83404300 | 0.57113800  |
| H                          | 4.38353500  | -2.86119900 | 1.97757400  |
| H                          | 6.66416100  | -0.84483300 | 1.52002100  |
| H                          | 6.71269700  | -2.21924000 | 2.62800900  |
| H                          | 5.61171000  | -0.87372700 | 2.93794300  |
| H                          | 1.98130500  | 4.05533300  | -1.81442600 |
| H                          | 2.70108100  | 2.54589600  | -2.38359700 |
| H                          | 3.57571400  | 3.54865300  | -1.21575000 |
| H                          | 1.18515500  | 4.23449000  | 0.67960100  |

|   |            |            |            |
|---|------------|------------|------------|
| H | 2.79931100 | 3.71073600 | 1.19688000 |
| H | 1.36444800 | 2.83505000 | 1.74745100 |

**Structure 12**

DEHBA\_Ntrans\_C2\_radical

|   |             |             |             |
|---|-------------|-------------|-------------|
| C | -0.73583700 | 1.61820700  | -0.52402800 |
| N | -0.27068800 | 0.32792800  | -0.44596000 |
| O | -1.73426000 | 1.89354300  | -1.18133900 |
| C | 0.00447800  | 2.69682300  | 0.27040600  |
| H | 1.07450600  | 2.66739700  | 0.04314000  |
| H | -0.07919500 | 2.45388300  | 1.33798700  |
| C | -0.54109500 | 4.10348600  | 0.01663500  |
| H | -0.46170600 | 4.33136700  | -1.05013600 |
| C | 0.19204800  | 5.16789800  | 0.83775700  |
| H | -1.60972000 | 4.12009800  | 0.24355400  |
| H | 1.26092000  | 5.19373700  | 0.60073100  |
| H | 0.09731600  | 4.98041100  | 1.91254900  |
| H | -0.21299200 | 6.16409000  | 0.64049700  |
| C | 0.96878400  | -0.04869100 | 0.24450900  |
| C | -1.05608000 | -0.71113400 | -1.13514000 |
| H | -1.28738300 | -0.34574100 | -2.13623100 |
| C | -2.36705000 | -1.11367300 | -0.42335400 |
| H | -0.41685400 | -1.59132400 | -1.23986000 |
| C | -3.17385600 | -2.07578600 | -1.31943100 |
| C | -2.07483500 | -1.72591200 | 0.96103600  |
| H | -1.53429400 | -2.67197500 | 0.81327000  |
| C | -3.26803600 | -1.99755100 | 1.89794300  |
| H | -1.38575700 | -1.06251100 | 1.49614800  |
| H | -2.86442900 | -2.52155400 | 2.77171700  |
| H | -3.96882100 | -2.70258300 | 1.43602700  |
| C | -4.04298200 | -0.75664200 | 2.39182800  |
| H | -4.41889300 | -0.96242400 | 3.40022000  |
| C | -5.23368900 | -0.33271100 | 1.52213600  |
| H | -3.34791900 | 0.08520700  | 2.49965300  |
| H | -5.95824900 | -1.14851800 | 1.43142100  |
| H | -4.93140400 | -0.04388300 | 0.51348200  |
| H | -5.75414300 | 0.52184300  | 1.96444600  |
| H | 1.04843200  | 0.52101300  | 1.17397100  |
| C | 2.27546400  | 0.13519100  | -0.56590300 |
| H | 0.86385400  | -1.09420200 | 0.53970900  |
| H | 2.29409600  | 1.17744400  | -0.90947800 |
| C | 2.31046600  | -0.74453000 | -1.83052400 |
| C | 3.50713600  | -0.03723000 | 0.35464400  |
| H | 4.39441100  | 0.29377600  | -0.19234000 |
| C | 3.74995300  | -1.44875200 | 0.91243600  |
| H | 3.40440900  | 0.65896700  | 1.19769600  |
| H | 3.91231300  | -2.15363400 | 0.08820100  |
| H | 2.85429300  | -1.79756200 | 1.43805700  |
| C | 4.94053900  | -1.53874000 | 1.88236900  |
| H | 1.40739500  | -0.54195900 | -2.41358200 |
| H | 2.26006500  | -1.80315500 | -1.54883300 |
| C | 3.52957800  | -0.51274300 | -2.73030800 |
| H | 4.46436900  | -0.80248600 | -2.24347000 |
| H | 3.61556700  | 0.54122700  | -3.01405300 |
| H | 3.44690800  | -1.09552300 | -3.65171000 |
| C | -3.77086000 | -1.44394500 | -2.58344500 |
| H | -3.99192700 | -2.50181400 | -0.73129400 |
| H | -2.53439800 | -2.92552200 | -1.59662800 |
| H | -4.41485200 | -0.59648300 | -2.33171500 |
| H | -4.37618600 | -2.17297800 | -3.12992100 |
| H | -3.00461300 | -1.07655300 | -3.27009500 |
| C | 6.30902100  | -1.28504500 | 1.23980300  |

|   |            |             |            |
|---|------------|-------------|------------|
| H | 4.94324700 | -2.53594300 | 2.33642100 |
| H | 4.78723400 | -0.83140400 | 2.70692000 |
| H | 7.11382200 | -1.42062000 | 1.96757300 |
| H | 6.39598800 | -0.26958500 | 0.84435700 |
| H | 6.49026600 | -1.98043800 | 0.41356400 |

**Structure 12**

DEHiBA\_Ntrans\_C2\_radical

|   |             |             |             |
|---|-------------|-------------|-------------|
| C | 0.49597200  | 2.02591200  | -0.75819800 |
| N | 0.09767200  | 0.72712900  | -0.53994800 |
| O | -0.26178800 | 2.85875500  | -1.24596200 |
| C | 1.91065300  | 2.45908300  | -0.34531200 |
| C | 2.58349500  | 3.19685300  | -1.51244100 |
| H | 2.52458600  | 1.59635200  | -0.08776500 |
| C | 1.80658100  | 3.36313600  | 0.89731600  |
| C | 0.95709900  | -0.32328900 | 0.02519500  |
| C | -1.28656200 | 0.36037900  | -0.87360900 |
| H | -1.66929300 | 1.13337200  | -1.54004300 |
| C | -2.23868700 | 0.20013700  | 0.33470200  |
| H | -1.26620600 | -0.58093200 | -1.42945600 |
| C | -2.33504400 | 1.50080600  | 1.15278300  |
| C | -3.61480900 | -0.30215500 | -0.17891500 |
| H | -4.30971200 | 0.54324000  | -0.21735500 |
| C | -4.22299600 | -1.45388100 | 0.63637600  |
| H | -3.51296800 | -0.64585100 | -1.21647000 |
| H | -4.35957200 | -1.14382700 | 1.67885300  |
| H | -3.50068100 | -2.27944600 | 0.65978000  |
| C | -5.55683600 | -1.98587900 | 0.08881500  |
| H | -5.42106100 | -2.28953000 | -0.95686300 |
| C | -6.72559700 | -0.99828400 | 0.18529100  |
| H | -5.81896600 | -2.89817300 | 0.63663200  |
| H | -6.55296900 | -0.09910400 | -0.41197100 |
| H | -6.88899300 | -0.68275300 | 1.22102000  |
| H | -7.65381000 | -1.45340400 | -0.17146800 |
| H | 1.49439900  | 0.07222800  | 0.88884700  |
| C | 1.96073800  | -0.97450800 | -0.95644100 |
| H | 0.29399200  | -1.09464600 | 0.42378900  |
| H | 2.56420400  | -0.16599400 | -1.38658200 |
| C | 1.28103000  | -1.68029600 | -2.15072700 |
| C | 2.92357900  | -1.91643000 | -0.20101500 |
| H | 2.34990800  | -2.59197800 | 0.44649400  |
| C | 4.00376100  | -1.21450000 | 0.63397200  |
| H | 3.42259700  | -2.56072300 | -0.93527400 |
| H | 3.54381000  | -0.57453700 | 1.39659200  |
| H | 4.58303800  | -0.54617200 | -0.01618100 |
| C | 4.96044800  | -2.19238000 | 1.32729600  |
| H | 2.06490100  | -1.93851300 | -2.87216700 |
| H | 0.63342500  | -0.96203000 | -2.66349100 |
| C | 0.48430300  | -2.94961100 | -1.82163800 |
| H | -0.32338600 | -2.76178500 | -1.10835800 |
| H | 1.12129400  | -3.73086400 | -1.39878100 |
| H | 0.02661100  | -3.35716800 | -2.72709900 |
| C | -3.15852600 | 1.39556900  | 2.44052100  |
| H | -2.74804900 | 2.28857300  | 0.51282500  |
| H | -1.32332600 | 1.82812200  | 1.41064900  |
| H | -2.76800700 | 0.61548600  | 3.10269200  |
| H | -3.13229500 | 2.33967200  | 2.99199900  |
| H | -4.20849000 | 1.16593700  | 2.24041200  |
| C | 6.04806800  | -1.49488500 | 2.14928200  |
| H | 5.42887000  | -2.83404300 | 0.57113800  |
| H | 4.38353500  | -2.86119900 | 1.97757400  |
| H | 6.66416100  | -0.84483300 | 1.52002100  |

|   |            |             |             |
|---|------------|-------------|-------------|
| H | 6.71269700 | -2.21924000 | 2.62800900  |
| H | 5.61171000 | -0.87372700 | 2.93794300  |
| H | 1.98130500 | 4.05533300  | -1.81442600 |
| H | 2.70108100 | 2.54589600  | -2.38359700 |
| H | 3.57571400 | 3.54865300  | -1.21575000 |
| H | 1.18515500 | 4.23449000  | 0.67960100  |
| H | 2.79931100 | 3.71073600  | 1.19688000  |
| H | 1.36444800 | 2.83505000  | 1.74745100  |

**Structure 13**

DEHBA\_Ntrans\_C3H1\_radical

|   |             |             |             |
|---|-------------|-------------|-------------|
| C | -0.73583700 | 1.61820700  | -0.52402800 |
| N | -0.27068800 | 0.32792800  | -0.44596000 |
| O | -1.73426000 | 1.89354300  | -1.18133900 |
| C | 0.00447800  | 2.69682300  | 0.27040600  |
| H | 1.07450600  | 2.66739700  | 0.04314000  |
| H | -0.07919500 | 2.45388300  | 1.33798700  |
| C | -0.54109500 | 4.10348600  | 0.01663500  |
| H | -0.46170600 | 4.33136700  | -1.05013600 |
| C | 0.19204800  | 5.16789800  | 0.83775700  |
| H | -1.60972000 | 4.12009800  | 0.24355400  |
| H | 1.26092000  | 5.19373700  | 0.60073100  |
| H | 0.09731600  | 4.98041100  | 1.91254900  |
| H | -0.21299200 | 6.16409000  | 0.64049700  |
| C | 0.96878400  | -0.04869100 | 0.24450900  |
| C | -1.05608000 | -0.71113400 | -1.13514000 |
| H | -1.28738300 | -0.34574100 | -2.13623100 |
| C | -2.36705000 | -1.11367300 | -0.42335400 |
| H | -0.41685400 | -1.59132400 | -1.23986000 |
| C | -3.17385600 | -2.07578600 | -1.31943100 |
| H | -2.94565300 | -0.19504600 | -0.29574700 |
| C | -2.07483500 | -1.72591200 | 0.96103600  |
| H | -1.53429400 | -2.67197500 | 0.81327000  |
| C | -3.26803600 | -1.99755100 | 1.89794300  |
| H | -2.86442900 | -2.52155400 | 2.77171700  |
| H | -3.96882100 | -2.70258300 | 1.43602700  |
| C | -4.04298200 | -0.75664200 | 2.39182800  |
| H | -4.41889300 | -0.96242400 | 3.40022000  |
| C | -5.23368900 | -0.33271100 | 1.52213600  |
| H | -3.34791900 | 0.08520700  | 2.49965300  |
| H | -5.95824900 | -1.14851800 | 1.43142100  |
| H | -4.93140400 | -0.04388300 | 0.51348200  |
| H | -5.75414300 | 0.52184300  | 1.96444600  |
| H | 1.04843200  | 0.52101300  | 1.17397100  |
| C | 2.27546400  | 0.13519100  | -0.56590300 |
| H | 0.86385400  | -1.09420200 | 0.53970900  |
| H | 2.29409600  | 1.17744400  | -0.90947800 |
| C | 2.31046600  | -0.74453000 | -1.83052400 |
| C | 3.50713600  | -0.03723000 | 0.35464400  |
| H | 4.39441100  | 0.29377600  | -0.19234000 |
| C | 3.74995300  | -1.44875200 | 0.91243600  |
| H | 3.40440900  | 0.65896700  | 1.19769600  |
| H | 3.91231300  | -2.15363400 | 0.08820100  |
| H | 2.85429300  | -1.79756200 | 1.43805700  |
| C | 4.94053900  | -1.53874000 | 1.88236900  |
| H | 1.40739500  | -0.54195900 | -2.41358200 |
| H | 2.26006500  | -1.80315500 | -1.54883300 |
| C | 3.52957800  | -0.51274300 | -2.73030800 |
| H | 4.46436900  | -0.80248600 | -2.24347000 |
| H | 3.61556700  | 0.54122700  | -3.01405300 |
| H | 3.44690800  | -1.09552300 | -3.65171000 |
| C | -3.77086000 | -1.44394500 | -2.58344500 |

|   |             |             |             |
|---|-------------|-------------|-------------|
| H | -3.99192700 | -2.50181400 | -0.73129400 |
| H | -2.53439800 | -2.92552200 | -1.59662800 |
| H | -4.41485200 | -0.59648300 | -2.33171500 |
| H | -4.37618600 | -2.17297800 | -3.12992100 |
| H | -3.00461300 | -1.07655300 | -3.27009500 |
| C | 6.30902100  | -1.28504500 | 1.23980300  |
| H | 4.94324700  | -2.53594300 | 2.33642100  |
| H | 4.78723400  | -0.83140400 | 2.70692000  |
| H | 7.11382200  | -1.42062000 | 1.96757300  |
| H | 6.39598800  | -0.26958500 | 0.84435700  |
| H | 6.49026600  | -1.98043800 | 0.41356400  |

**Structure 13**

DEHiBA\_Ntrans\_C3H1\_radical

|   |             |             |             |
|---|-------------|-------------|-------------|
| C | 0.49597200  | 2.02591200  | -0.75819800 |
| N | 0.09767200  | 0.72712900  | -0.53994800 |
| O | -0.26178800 | 2.85875500  | -1.24596200 |
| C | 1.91065300  | 2.45908300  | -0.34531200 |
| C | 2.58349500  | 3.19685300  | -1.51244100 |
| H | 2.52458600  | 1.59635200  | -0.08776500 |
| C | 1.80658100  | 3.36313600  | 0.89731600  |
| C | 0.95709900  | -0.32328900 | 0.02519500  |
| C | -1.28656200 | 0.36037900  | -0.87360900 |
| H | -1.66929300 | 1.13337200  | -1.54004300 |
| C | -2.23868700 | 0.20013700  | 0.33470200  |
| H | -1.26620600 | -0.58093200 | -1.42945600 |
| C | -2.33504400 | 1.50080600  | 1.15278300  |
| H | -1.82239400 | -0.57727500 | 0.99172100  |
| C | -3.61480900 | -0.30215500 | -0.17891500 |
| C | -4.22299600 | -1.45388100 | 0.63637600  |
| H | -3.51296800 | -0.64585100 | -1.21647000 |
| H | -4.35957200 | -1.14382700 | 1.67885300  |
| H | -3.50068100 | -2.27944600 | 0.65978000  |
| C | -5.55683600 | -1.98587900 | 0.08881500  |
| H | -5.42106100 | -2.28953000 | -0.95686300 |
| C | -6.72559700 | -0.99828400 | 0.18529100  |
| H | -5.81896600 | -2.89817300 | 0.63663200  |
| H | -6.55296900 | -0.09910400 | -0.41197100 |
| H | -6.88899300 | -0.68275300 | 1.22102000  |
| H | -7.65381000 | -1.45340400 | -0.17146800 |
| H | 1.49439900  | 0.07222800  | 0.88884700  |
| C | 1.96073800  | -0.97450800 | -0.95644100 |
| H | 0.29399200  | -1.09464600 | 0.42378900  |
| H | 2.56420400  | -0.16599400 | -1.38658200 |
| C | 1.28103000  | -1.68029600 | -2.15072700 |
| C | 2.92357900  | -1.91643000 | -0.20101500 |
| H | 2.34990800  | -2.59197800 | 0.44649400  |
| C | 4.00376100  | -1.21450000 | 0.63397200  |
| H | 3.42259700  | -2.56072300 | -0.93527400 |
| H | 3.54381000  | -0.57453700 | 1.39659200  |
| H | 4.58303800  | -0.54617200 | -0.01618100 |
| C | 4.96044800  | -2.19238000 | 1.32729600  |
| H | 2.06490100  | -1.93851300 | -2.87216700 |
| H | 0.63342500  | -0.96203000 | -2.66349100 |
| C | 0.48430300  | -2.94961100 | -1.82163800 |
| H | -0.32338600 | -2.76178500 | -1.10835800 |
| H | 1.12129400  | -3.73086400 | -1.39878100 |
| H | 0.02661100  | -3.35716800 | -2.72709900 |
| C | -3.15852600 | 1.39556900  | 2.44052100  |
| H | -2.74804900 | 2.28857300  | 0.51282500  |
| H | -1.32332600 | 1.82812200  | 1.41064900  |
| H | -2.76800700 | 0.61548600  | 3.10269200  |

|   |             |             |             |
|---|-------------|-------------|-------------|
| H | -3.13229500 | 2.33967200  | 2.99199900  |
| H | -4.20849000 | 1.16593700  | 2.24041200  |
| C | 6.04806800  | -1.49488500 | 2.14928200  |
| H | 5.42887000  | -2.83404300 | 0.57113800  |
| H | 4.38353500  | -2.86119900 | 1.97757400  |
| H | 6.66416100  | -0.84483300 | 1.52002100  |
| H | 6.71269700  | -2.21924000 | 2.62800900  |
| H | 5.61171000  | -0.87372700 | 2.93794300  |
| H | 1.98130500  | 4.05533300  | -1.81442600 |
| H | 2.70108100  | 2.54589600  | -2.38359700 |
| H | 3.57571400  | 3.54865300  | -1.21575000 |
| H | 1.18515500  | 4.23449000  | 0.67960100  |
| H | 2.79931100  | 3.71073600  | 1.19688000  |
| H | 1.36444800  | 2.83505000  | 1.74745100  |

#### Structure 14

DEHBA\_Ntrans\_C3H2\_radical

|   |             |             |             |
|---|-------------|-------------|-------------|
| C | -0.73583700 | 1.61820700  | -0.52402800 |
| N | -0.27068800 | 0.32792800  | -0.44596000 |
| O | -1.73426000 | 1.89354300  | -1.18133900 |
| C | 0.00447800  | 2.69682300  | 0.27040600  |
| H | 1.07450600  | 2.66739700  | 0.04314000  |
| H | -0.07919500 | 2.45388300  | 1.33798700  |
| C | -0.54109500 | 4.10348600  | 0.01663500  |
| H | -0.46170600 | 4.33136700  | -1.05013600 |
| C | 0.19204800  | 5.16789800  | 0.83775700  |
| H | -1.60972000 | 4.12009800  | 0.24355400  |
| H | 1.26092000  | 5.19373700  | 0.60073100  |
| H | 0.09731600  | 4.98041100  | 1.91254900  |
| H | -0.21299200 | 6.16409000  | 0.64049700  |
| C | 0.96878400  | -0.04869100 | 0.24450900  |
| C | -1.05608000 | -0.71113400 | -1.13514000 |
| H | -1.28738300 | -0.34574100 | -2.13623100 |
| C | -2.36705000 | -1.11367300 | -0.42335400 |
| H | -0.41685400 | -1.59132400 | -1.23986000 |
| C | -3.17385600 | -2.07578600 | -1.31943100 |
| H | -2.94565300 | -0.19504600 | -0.29574700 |
| C | -2.07483500 | -1.72591200 | 0.96103600  |
| C | -3.26803600 | -1.99755100 | 1.89794300  |
| H | -1.38575700 | -1.06251100 | 1.49614800  |
| H | -2.86442900 | -2.52155400 | 2.77171700  |
| H | -3.96882100 | -2.70258300 | 1.43602700  |
| C | -4.04298200 | -0.75664200 | 2.39182800  |
| H | -4.41893000 | -0.96242400 | 3.40022000  |
| C | -5.23368900 | -0.33271100 | 1.52213600  |
| H | -3.34791900 | 0.08520700  | 2.49965300  |
| H | -5.95824900 | -1.14851800 | 1.43142100  |
| H | -4.93140400 | -0.04388300 | 0.51348200  |
| H | -5.75414300 | 0.52184300  | 1.96444600  |
| H | 1.04843200  | 0.52101300  | 1.17397100  |
| C | 2.27546400  | 0.13519100  | -0.56590300 |
| H | 0.86385400  | -1.09420200 | 0.53970900  |
| H | 2.29409600  | 1.17744400  | -0.90947800 |
| C | 2.31046600  | -0.74453000 | -1.83052400 |
| C | 3.50713600  | -0.03723000 | 0.35464400  |
| H | 4.39441100  | 0.29377600  | -0.19234000 |
| C | 3.74995300  | -1.44875200 | 0.91243600  |
| H | 3.40440900  | 0.65896700  | 1.19769600  |
| H | 3.91231300  | -2.15363400 | 0.08820100  |
| H | 2.85429300  | -1.79756200 | 1.43805700  |
| C | 4.94053900  | -1.53874000 | 1.88236900  |
| H | 1.40739500  | -0.54195900 | -2.41358200 |

|   |             |             |             |
|---|-------------|-------------|-------------|
| H | 2.26006500  | -1.80315500 | -1.54883300 |
| C | 3.52957800  | -0.51274300 | -2.73030800 |
| H | 4.46436900  | -0.80248600 | -2.24347000 |
| H | 3.61556700  | 0.54122700  | -3.01405300 |
| H | 3.44690800  | -1.09552300 | -3.65171000 |
| C | -3.77086000 | -1.44394500 | -2.58344500 |
| H | -3.99192700 | -2.50181400 | -0.73129400 |
| H | -2.53439800 | -2.92552200 | -1.59662800 |
| H | -4.41485200 | -0.59648300 | -2.33171500 |
| H | -4.37618600 | -2.17297800 | -3.12992100 |
| H | -3.00461300 | -1.07655300 | -3.27009500 |
| C | 6.30902100  | -1.28504500 | 1.23980300  |
| H | 4.94324700  | -2.53594300 | 2.33642100  |
| H | 4.78723400  | -0.83140400 | 2.70692000  |
| H | 7.11382200  | -1.42062000 | 1.96757300  |
| H | 6.39598800  | -0.26958500 | 0.84435700  |
| H | 6.49026600  | -1.98043800 | 0.41356400  |

#### Structure 14

DEHiBA\_Ntrans\_C3H2\_radical

|   |             |             |             |
|---|-------------|-------------|-------------|
| C | 0.49597200  | 2.02591200  | -0.75819800 |
| N | 0.09767200  | 0.72712900  | -0.53994800 |
| O | -0.26178800 | 2.85875500  | -1.24596200 |
| C | 1.91065300  | 2.45908300  | -0.34531200 |
| C | 2.58349500  | 3.19685300  | -1.51244100 |
| H | 2.52458600  | 1.59635200  | -0.08776500 |
| C | 1.80658100  | 3.36313600  | 0.89731600  |
| C | 0.95709900  | -0.32328900 | 0.02519500  |
| C | -1.28656200 | 0.36037900  | -0.87360900 |
| H | -1.66929300 | 1.13337200  | -1.54004300 |
| C | -2.23868700 | 0.20013700  | 0.33470200  |
| H | -1.26620600 | -0.58093200 | -1.42945600 |
| C | -2.33504400 | 1.50080600  | 1.15278300  |
| H | -1.82239400 | -0.57727500 | 0.99172100  |
| C | -3.61480900 | -0.30215500 | -0.17891500 |
| H | -4.30971200 | 0.54324000  | -0.21735500 |
| C | -4.22299600 | -1.45388100 | 0.63637600  |
| H | -4.35957200 | -1.14382700 | 1.67885300  |
| H | -3.50068100 | -2.27944600 | 0.65978000  |
| C | -5.55683600 | -1.98587900 | 0.08881500  |
| H | -5.42106100 | -2.28953000 | -0.95686300 |
| C | -6.72559700 | -0.99828400 | 0.18529100  |
| H | -5.81896600 | -2.89817300 | 0.63663200  |
| H | -6.55296900 | -0.09910400 | -0.41197100 |
| H | -6.88899300 | -0.68275300 | 1.22102000  |
| H | -7.65381000 | -1.45340400 | -0.17146800 |
| H | 1.49439900  | 0.07222800  | 0.88884700  |
| C | 1.96073800  | -0.97450800 | -0.95644100 |
| H | 0.29399200  | -1.09464600 | 0.42378900  |
| H | 2.56420400  | -0.16599400 | -1.38658200 |
| C | 1.28103000  | -1.68029600 | -2.15072700 |
| C | 2.92357900  | -1.91643000 | -0.20101500 |
| H | 2.34990800  | -2.59197800 | 0.44649400  |
| C | 4.00376100  | -1.21450000 | 0.63397200  |
| H | 3.42259700  | -2.56072300 | -0.93527400 |
| H | 3.54381000  | -0.57453700 | 1.39659200  |
| H | 4.58303800  | -0.54617200 | -0.01618100 |
| C | 4.96044800  | -2.19238000 | 1.32729600  |
| H | 2.06490100  | -1.93851300 | -2.87216700 |
| H | 0.63342500  | -0.96203000 | -2.66349100 |
| C | 0.48430300  | -2.94961100 | -1.82163800 |
| H | -0.32338600 | -2.76178500 | -1.10835800 |

|   |             |             |             |
|---|-------------|-------------|-------------|
| H | 1.12129400  | -3.73086400 | -1.39878100 |
| H | 0.02661100  | -3.35716800 | -2.72709900 |
| C | -3.15852600 | 1.39556900  | 2.44052100  |
| H | -2.74804900 | 2.28857300  | 0.51282500  |
| H | -1.32332600 | 1.82812200  | 1.41064900  |
| H | -2.76800700 | 0.61548600  | 3.10269200  |
| H | -3.13229500 | 2.33967200  | 2.99199900  |
| H | -4.20849000 | 1.16593700  | 2.24041200  |
| C | 6.04806800  | -1.49488500 | 2.14928200  |
| H | 5.42887000  | -2.83404300 | 0.57113800  |
| H | 4.38353500  | -2.86119900 | 1.97757400  |
| H | 6.66416100  | -0.84483300 | 1.52002100  |
| H | 6.71269700  | -2.21924000 | 2.62800900  |
| H | 5.61171000  | -0.87372700 | 2.93794300  |
| H | 1.98130500  | 4.05533300  | -1.81442600 |
| H | 2.70108100  | 2.54589600  | -2.38359700 |
| H | 3.57571400  | 3.54865300  | -1.21575000 |
| H | 1.18515500  | 4.23449000  | 0.67960100  |
| H | 2.79931100  | 3.71073600  | 1.19688000  |
| H | 1.36444800  | 2.83505000  | 1.74745100  |

### Structure 15

DEHBA\_Ntrans\_C4H\_radical

|   |             |             |             |
|---|-------------|-------------|-------------|
| C | -0.73583700 | 1.61820700  | -0.52402800 |
| N | -0.27068800 | 0.32792800  | -0.44596000 |
| O | -1.73426000 | 1.89354300  | -1.18133900 |
| C | 0.00447800  | 2.69682300  | 0.27040600  |
| H | 1.07450600  | 2.66739700  | 0.04314000  |
| H | -0.07919500 | 2.45388300  | 1.33798700  |
| C | -0.54109500 | 4.10348600  | 0.01663500  |
| H | -0.46170600 | 4.33136700  | -1.05013600 |
| C | 0.19204800  | 5.16789800  | 0.83775700  |
| H | -1.60972000 | 4.12009800  | 0.24355400  |
| H | 1.26092000  | 5.19373700  | 0.60073100  |
| H | 0.09731600  | 4.98041100  | 1.91254900  |
| H | -0.21299200 | 6.16409000  | 0.64049700  |
| C | 0.96878400  | -0.04869100 | 0.24450900  |
| C | -1.05608000 | -0.71113400 | -1.13514000 |
| H | -1.28738300 | -0.34574100 | -2.13623100 |
| C | -2.36705000 | -1.11367300 | -0.42335400 |
| H | -0.41685400 | -1.59132400 | -1.23986000 |
| C | -3.17385600 | -2.07578600 | -1.31943100 |
| H | -2.94565300 | -0.19504600 | -0.29574700 |
| C | -2.07483500 | -1.72591200 | 0.96103600  |
| H | -1.53429400 | -2.67197500 | 0.81327000  |
| C | -3.26803600 | -1.99755100 | 1.89794300  |
| H | -1.38575700 | -1.06251100 | 1.49614800  |
| H | -3.96882100 | -2.70258300 | 1.43602700  |
| C | -4.04298200 | -0.75664200 | 2.39182800  |
| H | -4.41889300 | -0.96242400 | 3.40022000  |
| C | -5.23368900 | -0.33271100 | 1.52213600  |
| H | -3.34791900 | 0.08520700  | 2.49965300  |
| H | -5.95824900 | -1.14851800 | 1.43142100  |
| H | -4.93140400 | -0.04388300 | 0.51348200  |
| H | -5.75414300 | 0.52184300  | 1.96444600  |
| H | 1.04843200  | 0.52101300  | 1.17397100  |
| C | 2.27546400  | 0.13519100  | -0.56590300 |
| H | 0.86385400  | -1.09420200 | 0.53970900  |
| H | 2.29409600  | 1.17744400  | -0.90947800 |
| C | 2.31046600  | -0.74453000 | -1.83052400 |
| C | 3.50713600  | -0.03723000 | 0.35464400  |
| H | 4.39441100  | 0.29377600  | -0.19234000 |

|   |             |             |             |
|---|-------------|-------------|-------------|
| C | 3.74995300  | -1.44875200 | 0.91243600  |
| H | 3.40440900  | 0.65896700  | 1.19769600  |
| H | 3.91231300  | -2.15363400 | 0.08820100  |
| H | 2.85429300  | -1.79756200 | 1.43805700  |
| C | 4.94053900  | -1.53874000 | 1.88236900  |
| H | 1.40739500  | -0.54195900 | -2.41358200 |
| H | 2.26006500  | -1.80315500 | -1.54883300 |
| C | 3.52957800  | -0.51274300 | -2.73030800 |
| H | 4.46436900  | -0.80248600 | -2.24347000 |
| H | 3.61556700  | 0.54122700  | -3.01405300 |
| H | 3.44690800  | -1.09552300 | -3.65171000 |
| C | -3.77086000 | -1.44394500 | -2.58344500 |
| H | -3.99192700 | -2.50181400 | -0.73129400 |
| H | -2.53439800 | -2.92552200 | -1.59662800 |
| H | -4.41485200 | -0.59648300 | -2.33171500 |
| H | -4.37618600 | -2.17297800 | -3.12992100 |
| H | -3.00461300 | -1.07655300 | -3.27009500 |
| C | 6.30902100  | -1.28504500 | 1.23980300  |
| H | 4.94324700  | -2.53594300 | 2.33642100  |
| H | 4.78723400  | -0.83140400 | 2.70692000  |
| H | 7.11382200  | -1.42062000 | 1.96757300  |
| H | 6.39598800  | -0.26958500 | 0.84435700  |
| H | 6.49026600  | -1.98043800 | 0.41356400  |

### Structure 15

DEHiBA\_Ntrans\_C4H\_radical

|   |             |             |             |
|---|-------------|-------------|-------------|
| C | 0.49597200  | 2.02591200  | -0.75819800 |
| N | 0.09767200  | 0.72712900  | -0.53994800 |
| O | -0.26178800 | 2.85875500  | -1.24596200 |
| C | 1.91065300  | 2.45908300  | -0.34531200 |
| C | 2.58349500  | 3.19685300  | -1.51244100 |
| H | 2.52458600  | 1.59635200  | -0.08776500 |
| C | 1.80658100  | 3.36313600  | 0.89731600  |
| C | 0.95709900  | -0.32328900 | 0.02519500  |
| C | -1.28656200 | 0.36037900  | -0.87360900 |
| H | -1.66929300 | 1.13337200  | -1.54004300 |
| C | -2.23868700 | 0.20013700  | 0.33470200  |
| H | -1.26620600 | -0.58093200 | -1.42945600 |
| C | -2.33504400 | 1.50080600  | 1.15278300  |
| H | -1.82239400 | -0.57727500 | 0.99172100  |
| C | -3.61480900 | -0.30215500 | -0.17891500 |
| H | -4.30971200 | 0.54324000  | -0.21735500 |
| C | -4.22299600 | -1.45388100 | 0.63637600  |
| H | -3.51296800 | -0.64585100 | -1.21647000 |
| H | -4.35957200 | -1.14382700 | 1.67885300  |
| C | -5.55683600 | -1.98587900 | 0.08881500  |
| H | -5.42106100 | -2.28953000 | -0.95686300 |
| C | -6.72559700 | -0.99828400 | 0.18529100  |
| H | -5.81896600 | -2.89817300 | 0.63663200  |
| H | -6.55296900 | -0.09910400 | -0.41197100 |
| H | -6.88899300 | -0.68275300 | 1.22102000  |
| H | -7.65381000 | -1.45340400 | -0.17146800 |
| H | 1.49439900  | 0.07222800  | 0.88884700  |
| C | 1.96073800  | -0.97450800 | -0.95644100 |
| H | 0.29399200  | -1.09464600 | 0.42378900  |
| H | 2.56420400  | -0.16599400 | -1.38658200 |
| C | 1.28103000  | -1.68029600 | -2.15072700 |
| C | 2.92357900  | -1.91643000 | -0.20101500 |
| H | 2.34990800  | -2.59197800 | 0.44649400  |
| C | 4.00376100  | -1.21450000 | 0.63397200  |
| H | 3.42259700  | -2.56072300 | -0.93527400 |
| H | 3.54381000  | -0.57453700 | 1.39659200  |



|   |             |             |             |
|---|-------------|-------------|-------------|
| H | 4.58303800  | -0.54617200 | -0.01618100 |
| C | 4.96044800  | -2.19238000 | 1.32729600  |
| H | 2.06490100  | -1.93851300 | -2.87216700 |
| H | 0.63342500  | -0.96203000 | -2.66349100 |
| C | 0.48430300  | -2.94961100 | -1.82163800 |
| H | -0.32338600 | -2.76178500 | -1.10835800 |
| H | 1.12129400  | -3.73086400 | -1.39878100 |
| H | 0.02661100  | -3.35716800 | -2.72709900 |
| C | -3.15852600 | 1.39556900  | 2.44052100  |
| H | -2.74804900 | 2.28857300  | 0.51282500  |
| H | -1.32332600 | 1.82812200  | 1.41064900  |
| H | -2.76800700 | 0.61548600  | 3.10269200  |
| H | -3.13229500 | 2.33967200  | 2.99199900  |
| H | -4.20849000 | 1.16593700  | 2.24041200  |
| C | 6.04806800  | -1.49488500 | 2.14928200  |
| H | 5.42887000  | -2.83404300 | 0.57113800  |
| H | 4.38353500  | -2.86119900 | 1.97757400  |
| H | 6.66416100  | -0.84483300 | 1.52002100  |
| H | 6.71269700  | -2.21924000 | 2.62800900  |
| H | 5.61171000  | -0.87372700 | 2.93794300  |
| H | 1.98130500  | 4.05533300  | -1.81442600 |
| H | 2.70108100  | 2.54589600  | -2.38359700 |
| H | 3.57571400  | 3.54865300  | -1.21575000 |
| H | 1.18515500  | 4.23449000  | 0.67960100  |
| H | 2.79931100  | 3.71073600  | 1.19688000  |
| H | 1.36444800  | 2.83505000  | 1.74745100  |

#### Structure 16

DEHBA\_Ntrans\_C5H\_radical

|   |             |             |             |
|---|-------------|-------------|-------------|
| C | -0.73583700 | 1.61820700  | -0.52402800 |
| N | -0.27068800 | 0.32792800  | -0.44596000 |
| O | -1.73426000 | 1.89354300  | -1.18133900 |
| C | 0.00447800  | 2.69682300  | 0.27040600  |
| H | 1.07450600  | 2.66739700  | 0.04314000  |
| H | -0.07919500 | 2.45388300  | 1.33798700  |
| C | -0.54109500 | 4.10348600  | 0.01663500  |
| H | -0.46170600 | 4.33136700  | -1.05013600 |
| C | 0.19204800  | 5.16789800  | 0.83775700  |
| H | -1.60972000 | 4.12009800  | 0.24355400  |
| H | 1.26092000  | 5.19373700  | 0.60073100  |
| H | 0.09731600  | 4.98041100  | 1.91254900  |
| H | -0.21299200 | 6.16409000  | 0.64049700  |
| C | 0.96878400  | -0.04869100 | 0.24450900  |
| C | -1.05608000 | -0.71113400 | -1.13514000 |
| H | -1.28738300 | -0.34574100 | -2.13623100 |
| C | -2.36705000 | -1.11367300 | -0.42335400 |
| H | -0.41685400 | -1.59132400 | -1.23986000 |
| C | -3.17385600 | -2.07578600 | -1.31943100 |
| H | -2.94565300 | -0.19504600 | -0.29574700 |
| C | -2.07483500 | -1.72591200 | 0.96103600  |
| H | -1.53429400 | -2.67197500 | 0.81327000  |
| C | -3.26803600 | -1.99755100 | 1.89794300  |
| H | -1.38575700 | -1.06251100 | 1.49614800  |
| H | -2.86442900 | -2.52155400 | 2.77171700  |
| H | -3.96882100 | -2.70258300 | 1.43602700  |
| C | -4.04298200 | -0.75664200 | 2.39182800  |
| H | -4.41889300 | -0.96242400 | 3.40022000  |
| C | -5.23368900 | -0.33271100 | 1.52213600  |
| H | -5.95824900 | -1.14851800 | 1.43142100  |
| H | -4.93140400 | -0.04388300 | 0.51348200  |
| H | -5.75414300 | 0.52184300  | 1.96444600  |
| H | 1.04843200  | 0.52101300  | 1.17397100  |

|   |             |             |             |
|---|-------------|-------------|-------------|
| C | 2.27546400  | 0.13519100  | -0.56590300 |
| H | 0.86385400  | -1.09420200 | 0.53970900  |
| H | 2.29409600  | 1.17744400  | -0.90947800 |
| C | 2.31046600  | -0.74453000 | -1.83052400 |
| C | 3.50713600  | -0.03723000 | 0.35464400  |
| H | 4.39441100  | 0.29377600  | -0.19234000 |
| C | 3.74995300  | -1.44875200 | 0.91243600  |
| H | 3.40440900  | 0.65896700  | 1.19769600  |
| H | 3.91231300  | -2.15363400 | 0.08820100  |
| H | 2.85429300  | -1.79756200 | 1.43805700  |
| C | 4.94053900  | -1.53874000 | 1.88236900  |
| H | 1.40739500  | -0.54195900 | -2.41358200 |
| H | 2.26006500  | -1.80315500 | -1.54883300 |
| C | 3.52957800  | -0.51274300 | -2.73030800 |
| H | 4.46436900  | -0.80248600 | -2.24347000 |
| H | 3.61556700  | 0.54122700  | -3.01405300 |
| H | 3.44690800  | -1.09552300 | -3.65171000 |
| C | -3.77086000 | -1.44394500 | -2.58344500 |
| H | -3.99192700 | -2.50181400 | -0.73129400 |
| H | -2.53439800 | -2.92552200 | -1.59662800 |
| H | -4.41485200 | -0.59648300 | -2.33171500 |
| H | -4.37618600 | -2.17297800 | -3.12992100 |
| H | -3.00461300 | -1.07655300 | -3.27009500 |
| C | 6.30902100  | -1.28504500 | 1.23980300  |
| H | 4.94324700  | -2.53594300 | 2.33642100  |
| H | 4.78723400  | -0.83140400 | 2.70692000  |
| H | 7.11382200  | -1.42062000 | 1.96757300  |
| H | 6.39598800  | -0.26958500 | 0.84435700  |
| H | 6.49026600  | -1.98043800 | 0.41356400  |

#### Structure 16

DEHiBA\_Ntrans\_C5H\_radical

|   |             |             |             |
|---|-------------|-------------|-------------|
| C | 0.49597200  | 2.02591200  | -0.75819800 |
| N | 0.09767200  | 0.72712900  | -0.53994800 |
| O | -0.26178800 | 2.85875500  | -1.24596200 |
| C | 1.91065300  | 2.45908300  | -0.34531200 |
| C | 2.58349500  | 3.19685300  | -1.51244100 |
| H | 2.52458600  | 1.59635200  | -0.08776500 |
| C | 1.80658100  | 3.36313600  | 0.89731600  |
| C | 0.95709900  | -0.32328900 | 0.02519500  |
| C | -1.28656200 | 0.36037900  | -0.87360900 |
| H | -1.66929300 | 1.13337200  | -1.54004300 |
| C | -2.23868700 | 0.20013700  | 0.33470200  |
| H | -1.26620600 | -0.58093200 | -1.42945600 |
| C | -2.33504400 | 1.50080600  | 1.15278300  |
| H | -1.82239400 | -0.57727500 | 0.99172100  |
| C | -3.61480900 | -0.30215500 | -0.17891500 |
| H | -4.30971200 | 0.54324000  | -0.21735500 |
| C | -4.22299600 | -1.45388100 | 0.63637600  |
| H | -3.51296800 | -0.64585100 | -1.21647000 |
| H | -4.35957200 | -1.14382700 | 1.67885300  |
| H | -3.50068100 | -2.27944600 | 0.65978000  |
| C | -5.55683600 | -1.98587900 | 0.08881500  |
| C | -6.72559700 | -0.99828400 | 0.18529100  |
| H | -5.81896600 | -2.89817300 | 0.63663200  |
| H | -6.55296900 | -0.09910400 | -0.41197100 |
| H | -6.88899300 | -0.68275300 | 1.22102000  |
| H | -7.65381000 | -1.45340400 | -0.17146800 |
| H | 1.49439900  | 0.07222800  | 0.88884700  |
| C | 1.96073800  | -0.97450800 | -0.95644100 |
| H | 0.29399200  | -1.09464600 | 0.42378900  |
| H | 2.56420400  | -0.16599400 | -1.38658200 |

|   |             |             |             |
|---|-------------|-------------|-------------|
| C | 1.28103000  | -1.68029600 | -2.15072700 |
| C | 2.92357900  | -1.91643000 | -0.20101500 |
| H | 2.34990800  | -2.59197800 | 0.44649400  |
| C | 4.00376100  | -1.21450000 | 0.63397200  |
| H | 3.42259700  | -2.56072300 | -0.93527400 |
| H | 3.54381000  | -0.57453700 | 1.39659200  |
| H | 4.58303800  | -0.54617200 | -0.01618100 |
| C | 4.96044800  | -2.19238000 | 1.32729600  |
| H | 2.06490100  | -1.93851300 | -2.87216700 |
| H | 0.63342500  | -0.96203000 | -2.66349100 |
| C | 0.48430300  | -2.94961100 | -1.82163800 |
| H | -0.32338600 | -2.76178500 | -1.10835800 |
| H | 1.12129400  | -3.73086400 | -1.39878100 |
| H | 0.02661100  | -3.35716800 | -2.72709900 |
| C | -3.15852600 | 1.39556900  | 2.44052100  |
| H | -2.74804900 | 2.28857300  | 0.51282500  |
| H | -1.32332600 | 1.82812200  | 1.41064900  |
| H | -2.76800700 | 0.61548600  | 3.10269200  |
| H | -3.13229500 | 2.33967200  | 2.99199900  |
| H | -4.20849000 | 1.16593700  | 2.24041200  |
| C | 6.04806800  | -1.49488500 | 2.14928200  |
| H | 5.42887000  | -2.83404300 | 0.57113800  |
| H | 4.38353500  | -2.86119900 | 1.97757400  |
| H | 6.66416100  | -0.84483300 | 1.52002100  |
| H | 6.71269700  | -2.21924000 | 2.62800900  |
| H | 5.61171000  | -0.87372700 | 2.93794300  |
| H | 1.98130500  | 4.05533300  | -1.81442600 |
| H | 2.70108100  | 2.54589600  | -2.38359700 |
| H | 3.57571400  | 3.54865300  | -1.21575000 |
| H | 1.18515500  | 4.23449000  | 0.67960100  |
| H | 2.79931100  | 3.71073600  | 1.19688000  |
| H | 1.36444800  | 2.83505000  | 1.74745100  |

### Structure 17

DEHBA\_Ntrans\_C6H\_radical

|   |             |             |             |
|---|-------------|-------------|-------------|
| C | -0.73583700 | 1.61820700  | -0.52402800 |
| N | -0.27068800 | 0.32792800  | -0.44596000 |
| O | -1.73426000 | 1.89354300  | -1.18133900 |
| C | 0.00447800  | 2.69682300  | 0.27040600  |
| H | 1.07450600  | 2.66739700  | 0.04314000  |
| H | -0.07919500 | 2.45388300  | 1.33798700  |
| C | -0.54109500 | 4.10348600  | 0.01663500  |
| H | -0.46170600 | 4.33136700  | -1.05013600 |
| C | 0.19204800  | 5.16789800  | 0.83775700  |
| H | -1.60972000 | 4.12009800  | 0.24355400  |
| H | 1.26092000  | 5.19373700  | 0.60073100  |
| H | 0.09731600  | 4.98041100  | 1.91254900  |
| H | -0.21299200 | 6.16409000  | 0.64049700  |
| C | 0.96878400  | -0.04869100 | 0.24450900  |
| C | -1.05608000 | -0.71113400 | -1.13514000 |
| H | -1.28738300 | -0.34574100 | -2.13623100 |
| C | -2.36705000 | -1.11367300 | -0.42335400 |
| H | -0.41685400 | -1.59132400 | -1.23986000 |
| C | -3.17385600 | -2.07578600 | -1.31943100 |
| H | -2.94565300 | -0.19504600 | -0.29574700 |
| C | -2.07483500 | -1.72591200 | 0.96103600  |
| H | -1.53429400 | -2.67197500 | 0.81327000  |
| C | -3.26803600 | -1.99755100 | 1.89794300  |
| H | -1.38575700 | -1.06251100 | 1.49614800  |
| H | -2.86442900 | -2.52155400 | 2.77171700  |
| H | -3.96882100 | -2.70258300 | 1.43602700  |
| C | -4.04298200 | -0.75664200 | 2.39182800  |

|   |             |             |             |
|---|-------------|-------------|-------------|
| H | -4.41889300 | -0.96242400 | 3.40022000  |
| C | -5.23368900 | -0.33271100 | 1.52213600  |
| H | -3.34791900 | 0.08520700  | 2.49965300  |
| H | -5.95824900 | -1.14851800 | 1.43142100  |
| H | -5.75414300 | 0.52184300  | 1.96444600  |
| H | 1.04843200  | 0.52101300  | 1.17397100  |
| C | 2.27546400  | 0.13519100  | -0.56590300 |
| H | 0.86385400  | -1.09420200 | 0.53970900  |
| H | 2.29409600  | 1.17744400  | -0.90947800 |
| C | 2.31046600  | -0.74453000 | -1.83052400 |
| C | 3.50713600  | -0.03723000 | 0.35464400  |
| H | 4.39441100  | 0.29377600  | -0.19234000 |
| C | 3.74995300  | -1.44875200 | 0.91243600  |
| H | 3.40440900  | 0.65896700  | 1.19769600  |
| H | 3.91231300  | -2.15363400 | 0.08820100  |
| H | 2.85429300  | -1.79756200 | 1.43805700  |
| C | 4.94053900  | -1.53874000 | 1.88236900  |
| H | 1.40739500  | -0.54195900 | -2.41358200 |
| H | 2.26006500  | -1.80315500 | -1.54883300 |
| C | 3.52957800  | -0.51274300 | -2.73030800 |
| H | 4.46436900  | -0.80248600 | -2.24347000 |
| H | 3.61556700  | 0.54122700  | -3.01405300 |
| H | 3.44690800  | -1.09552300 | -3.65171000 |
| C | -3.77086000 | -1.44394500 | -2.58344500 |
| H | -3.99192700 | -2.50181400 | -0.73129400 |
| H | -2.53439800 | -2.92552200 | -1.59662800 |
| H | -4.41485200 | -0.59648300 | -2.33171500 |
| H | -4.37618600 | -2.17297800 | -3.12992100 |
| H | -3.00461300 | -1.07655300 | -3.27009500 |
| C | 6.30902100  | -1.28504500 | 1.23980300  |
| H | 4.94324700  | -2.53594300 | 2.33642100  |
| H | 4.78723400  | -0.83140400 | 2.70692000  |
| H | 7.11382200  | -1.42062000 | 1.96757300  |
| H | 6.39598800  | -0.26958500 | 0.84435700  |
| H | 6.49026600  | -1.98043800 | 0.41356400  |

### Structure 17

DEHiBA\_Ntrans\_C6H\_radical

|   |             |             |             |
|---|-------------|-------------|-------------|
| C | 0.49597200  | 2.02591200  | -0.75819800 |
| N | 0.09767200  | 0.72712900  | -0.53994800 |
| O | -0.26178800 | 2.85875500  | -1.24596200 |
| C | 1.91065300  | 2.45908300  | -0.34531200 |
| C | 2.58349500  | 3.19685300  | -1.51244100 |
| H | 2.52458600  | 1.59635200  | -0.08776500 |
| C | 1.80658100  | 3.36313600  | 0.89731600  |
| C | 0.95709900  | -0.32328900 | 0.02519500  |
| C | -1.28656200 | 0.36037900  | -0.87360900 |
| H | -1.66929300 | 1.13337200  | -1.54004300 |
| C | -2.23868700 | 0.20013700  | 0.33470200  |
| H | -1.26620600 | -0.58093200 | -1.42945600 |
| C | -2.33504400 | 1.50080600  | 1.15278300  |
| H | -1.82239400 | -0.57727500 | 0.99172100  |
| C | -3.61480900 | -0.30215500 | -0.17891500 |
| H | -4.30971200 | 0.54324000  | -0.21735500 |
| C | -4.22299600 | -1.45388100 | 0.63637600  |
| H | -3.51296800 | -0.64585100 | -1.21647000 |
| H | -4.35957200 | -1.14382700 | 1.67885300  |
| H | -3.50068100 | -2.27944600 | 0.65978000  |
| C | -5.55683600 | -1.98587900 | 0.08881500  |
| H | -5.42106100 | -2.28953000 | -0.95686300 |
| C | -6.72559700 | -0.99828400 | 0.18529100  |
| H | -5.81896600 | -2.89817300 | 0.63663200  |

|   |             |             |             |   |             |             |             |
|---|-------------|-------------|-------------|---|-------------|-------------|-------------|
| H | -6.88899300 | -0.68275300 | 1.22102000  | C | -3.26803600 | -1.99755100 | 1.89794300  |
| H | -7.65381000 | -1.45340400 | -0.17146800 | H | -1.38575700 | -1.06251100 | 1.49614800  |
| H | 1.49439900  | 0.07222800  | 0.88884700  | H | -2.86442900 | -2.52155400 | 2.77171700  |
| C | 1.96073800  | -0.97450800 | -0.95644100 | H | -3.96882100 | -2.70258300 | 1.43602700  |
| H | 0.29399200  | -1.09464600 | 0.42378900  | C | -4.04298200 | -0.75664200 | 2.39182800  |
| H | 2.56420400  | -0.16599400 | -1.38658200 | H | -4.41889300 | -0.96242400 | 3.40022000  |
| C | 1.28103000  | -1.68029600 | -2.15072700 | C | -5.23368900 | -0.33271100 | 1.52213600  |
| C | 2.92357900  | -1.91643000 | -0.20101500 | H | -3.34791900 | 0.08520700  | 2.49965300  |
| H | 2.34990800  | -2.59197800 | 0.44649400  | H | -5.95824900 | -1.14851800 | 1.43142100  |
| C | 4.00376100  | -1.21450000 | 0.63397200  | H | -4.93140400 | -0.04388300 | 0.51348200  |
| H | 3.42259700  | -2.56072300 | -0.93527400 | H | -5.75414300 | 0.52184300  | 1.96444600  |
| H | 3.54381000  | -0.57453700 | 1.39659200  | H | 1.04843200  | 0.52101300  | 1.17397100  |
| H | 4.58303800  | -0.54617200 | -0.01618100 | C | 2.27546400  | 0.13519100  | -0.56590300 |
| C | 4.96044800  | -2.19238000 | 1.32729600  | H | 0.86385400  | -1.09420200 | 0.53970900  |
| H | 2.06490100  | -1.93851300 | -2.87216700 | H | 2.29409600  | 1.17744400  | -0.90947800 |
| H | 0.63342500  | -0.96203000 | -2.66349100 | C | 2.31046600  | -0.74453000 | -1.83052400 |
| C | 0.48430300  | -2.94961100 | -1.82163800 | C | 3.50713600  | -0.03723000 | 0.35464400  |
| H | -0.32338600 | -2.76178500 | -1.10835800 | H | 4.39441100  | 0.29377600  | -0.19234000 |
| H | 1.12129400  | -3.73086400 | -1.39878100 | C | 3.74995300  | -1.44875200 | 0.91243600  |
| H | 0.02661100  | -3.35716800 | -2.72709900 | H | 3.40440900  | 0.65896700  | 1.19769600  |
| C | -3.15852600 | 1.39556900  | 2.44052100  | H | 3.91231300  | -2.15363400 | 0.08820100  |
| H | -2.74804900 | 2.28857300  | 0.51282500  | H | 2.85429300  | -1.79756200 | 1.43805700  |
| H | -1.32332600 | 1.82812200  | 1.41064900  | C | 4.94053900  | -1.53874000 | 1.88236900  |
| H | -2.76800700 | 0.61548600  | 3.10269200  | H | 1.40739500  | -0.54195900 | -2.41358200 |
| H | -3.13229500 | 2.33967200  | 2.99199900  | H | 2.26006500  | -1.80315500 | -1.54883300 |
| H | -4.20849000 | 1.16593700  | 2.24041200  | C | 3.52957800  | -0.51274300 | -2.73030800 |
| C | 6.04806800  | -1.49488500 | 2.14928200  | H | 4.46436900  | -0.80248600 | -2.24347000 |
| H | 5.42887000  | -2.83404300 | 0.57113800  | H | 3.61556700  | 0.54122700  | -3.01405300 |
| H | 4.38353500  | -2.86119900 | 1.97757400  | H | 3.44690800  | -1.09552300 | -3.65171000 |
| H | 6.66416100  | -0.84483300 | 1.52002100  | C | -3.77086000 | -1.44394500 | -2.58344500 |
| H | 6.71269700  | -2.21924000 | 2.62800900  | H | -3.99192700 | -2.50181400 | -0.73129400 |
| H | 5.61171000  | -0.87372700 | 2.93794300  | H | -2.53439800 | -2.92552200 | -1.59662800 |
| H | 1.98130500  | 4.05533300  | -1.81442600 | H | -4.41485200 | -0.59648300 | -2.33171500 |
| H | 2.70108100  | 2.54589600  | -2.38359700 | H | -4.37618600 | -2.17297800 | -3.12992100 |
| H | 3.57571400  | 3.54865300  | -1.21575000 | H | -3.00461300 | -1.07655300 | -3.27009500 |
| H | 1.18515500  | 4.23449000  | 0.67960100  | C | 6.30902100  | -1.28504500 | 1.23980300  |
| H | 2.79931100  | 3.71073600  | 1.19688000  | H | 4.94324700  | -2.53594300 | 2.33642100  |
| H | 1.36444800  | 2.83505000  | 1.74745100  | H | 4.78723400  | -0.83140400 | 2.70692000  |

### Structure 18

DEHBA\_C\_C1H1\_radical

|   |             |             |             |
|---|-------------|-------------|-------------|
| C | -0.73583700 | 1.61820700  | -0.52402800 |
| N | -0.27068800 | 0.32792800  | -0.44596000 |
| O | -1.73426000 | 1.89354300  | -1.18133900 |
| C | 0.00447800  | 2.69682300  | 0.27040600  |
| H | 1.07450600  | 2.66739700  | 0.04314000  |
| C | -0.54109500 | 4.10348600  | 0.01663500  |
| H | -0.46170600 | 4.33136700  | -1.05013600 |
| C | 0.19204800  | 5.16789800  | 0.83775700  |
| H | -1.60972000 | 4.12009800  | 0.24355400  |
| H | 1.26092000  | 5.19373700  | 0.60073100  |
| H | 0.09731600  | 4.98041100  | 1.91254900  |
| H | -0.21299200 | 6.16409000  | 0.64049700  |
| C | 0.96878400  | -0.04869100 | 0.24450900  |
| C | -1.05608000 | -0.71113400 | -1.13514000 |
| H | -1.28738300 | -0.34574100 | -2.13623100 |
| C | -2.36705000 | -1.11367300 | -0.42335400 |
| H | -0.41685400 | -1.59132400 | -1.23986000 |
| C | -3.17385600 | -2.07578600 | -1.31943100 |
| H | -2.94565300 | -0.19504600 | -0.29574700 |
| C | -2.07483500 | -1.72591200 | 0.96103600  |
| H | -1.53429400 | -2.67197500 | 0.81327000  |

### Structure 19

DEHBA\_C\_C1H2\_radical

|   |             |             |             |
|---|-------------|-------------|-------------|
| C | -0.73583700 | 1.61820700  | -0.52402800 |
| N | -0.27068800 | 0.32792800  | -0.44596000 |
| O | -1.73426000 | 1.89354300  | -1.18133900 |
| C | 0.00447800  | 2.69682300  | 0.27040600  |
| H | -0.07919500 | 2.45388300  | 1.33798700  |
| C | -0.54109500 | 4.10348600  | 0.01663500  |
| H | -0.46170600 | 4.33136700  | -1.05013600 |
| C | 0.19204800  | 5.16789800  | 0.83775700  |
| H | -1.60972000 | 4.12009800  | 0.24355400  |
| H | 1.26092000  | 5.19373700  | 0.60073100  |
| H | 0.09731600  | 4.98041100  | 1.91254900  |
| H | -0.21299200 | 6.16409000  | 0.64049700  |
| C | 0.96878400  | -0.04869100 | 0.24450900  |
| C | -1.05608000 | -0.71113400 | -1.13514000 |
| H | -1.28738300 | -0.34574100 | -2.13623100 |
| C | -2.36705000 | -1.11367300 | -0.42335400 |
| H | -0.41685400 | -1.59132400 | -1.23986000 |
| C | -3.17385600 | -2.07578600 | -1.31943100 |

|   |             |             |             |
|---|-------------|-------------|-------------|
| H | -2.94565300 | -0.19504600 | -0.29574700 |
| C | -2.07483500 | -1.72591200 | 0.96103600  |
| H | -1.53429400 | -2.67197500 | 0.81327000  |
| C | -3.26803600 | -1.99755100 | 1.89794300  |
| H | -1.38575700 | -1.06251100 | 1.49614800  |
| H | -2.86442900 | -2.52155400 | 2.77171700  |
| H | -3.96882100 | -2.70258300 | 1.43602700  |
| C | -4.04298200 | -0.75664200 | 2.39182800  |
| H | -4.41889300 | -0.96242400 | 3.40022000  |
| C | -5.23368900 | -0.33271100 | 1.52213600  |
| H | -3.34791900 | 0.08520700  | 2.49965300  |
| H | -5.95824900 | -1.14851800 | 1.43142100  |
| H | -4.93140400 | -0.04388300 | 0.51348200  |
| H | -5.75414300 | 0.52184300  | 1.96444600  |
| H | 1.04843200  | 0.52101300  | 1.17397100  |
| C | 2.27546400  | 0.13519100  | -0.56590300 |
| H | 0.86385400  | -1.09420200 | 0.53970900  |
| H | 2.29409600  | 1.17744400  | -0.90947800 |
| C | 2.31046600  | -0.74453000 | -1.83052400 |
| C | 3.50713600  | -0.03723000 | 0.35464400  |
| H | 4.39441100  | 0.29377600  | -0.19234000 |
| C | 3.74995300  | -1.44875200 | 0.91243600  |
| H | 3.40440900  | 0.65896700  | 1.19769600  |
| H | 3.91231300  | -2.15363400 | 0.08820100  |
| H | 2.85429300  | -1.79756200 | 1.43805700  |
| C | 4.94053900  | -1.53874000 | 1.88236900  |
| H | 1.40739500  | -0.54195900 | -2.41358200 |
| H | 2.26006500  | -1.80315500 | -1.54883300 |
| C | 3.52957800  | -0.51274300 | -2.73030800 |
| H | 4.46436900  | -0.80248600 | -2.24347000 |
| H | 3.61556700  | 0.54122700  | -3.01405300 |
| H | 3.44690800  | -1.09552300 | -3.65171000 |
| C | -3.77086000 | -1.44394500 | -2.58344500 |
| H | -3.99192700 | -2.50181400 | -0.73129400 |
| H | -2.53439800 | -2.92552200 | -1.59662800 |
| H | -4.41485200 | -0.59648300 | -2.33171500 |
| H | -4.37618600 | -2.17297800 | -3.12992100 |
| H | -3.00461300 | -1.07655300 | -3.27009500 |
| C | 6.30902100  | -1.28504500 | 1.23980300  |
| H | 4.94324700  | -2.53594300 | 2.33642100  |
| H | 4.78723400  | -0.83140400 | 2.70692000  |
| H | 7.11382200  | -1.42062000 | 1.96757300  |
| H | 6.39598800  | -0.26958500 | 0.84435700  |
| H | 6.49026600  | -1.98043800 | 0.41356400  |

### Structure 20

DEHBA\_C\_C2H\_radical

|   |             |             |             |
|---|-------------|-------------|-------------|
| C | -0.73583700 | 1.61820700  | -0.52402800 |
| N | -0.27068800 | 0.32792800  | -0.44596000 |
| O | -1.73426000 | 1.89354300  | -1.18133900 |
| C | 0.00447800  | 2.69682300  | 0.27040600  |
| H | 1.07450600  | 2.66739700  | 0.04314000  |
| H | -0.07919500 | 2.45388300  | 1.33798700  |
| C | -0.54109500 | 4.10348600  | 0.01663500  |
| H | -0.46170600 | 4.33136700  | -1.05013600 |
| C | 0.19204800  | 5.16789800  | 0.83775700  |
| H | 1.26092000  | 5.19373700  | 0.60073100  |
| H | 0.09731600  | 4.98041100  | 1.91254900  |
| H | -0.21299200 | 6.16409000  | 0.64049700  |
| C | 0.96878400  | -0.04869100 | 0.24450900  |
| C | -1.05608000 | -0.71113400 | -1.13514000 |
| H | -1.28738300 | -0.34574100 | -2.13623100 |

|   |             |             |             |
|---|-------------|-------------|-------------|
| C | -2.36705000 | -1.11367300 | -0.42335400 |
| H | -0.41685400 | -1.59132400 | -1.23986000 |
| C | -3.17385600 | -2.07578600 | -1.31943100 |
| H | -2.94565300 | -0.19504600 | -0.29574700 |
| C | -2.07483500 | -1.72591200 | 0.96103600  |
| H | -1.53429400 | -2.67197500 | 0.81327000  |
| C | -3.26803600 | -1.99755100 | 1.89794300  |
| H | -1.38575700 | -1.06251100 | 1.49614800  |
| H | -2.86442900 | -2.52155400 | 2.77171700  |
| C | -3.96882100 | -2.70258300 | 1.43602700  |
| H | -4.04298200 | -0.75664200 | 2.39182800  |
| C | -4.41889300 | -0.96242400 | 3.40022000  |
| C | -5.23368900 | -0.33271100 | 1.52213600  |
| H | -3.34791900 | 0.08520700  | 2.49965300  |
| H | -5.95824900 | -1.14851800 | 1.43142100  |
| H | -4.93140400 | -0.04388300 | 0.51348200  |
| H | -5.75414300 | 0.52184300  | 1.96444600  |
| H | 1.04843200  | 0.52101300  | 1.17397100  |
| C | 2.27546400  | 0.13519100  | -0.56590300 |
| H | 0.86385400  | -1.09420200 | 0.53970900  |
| H | 2.29409600  | 1.17744400  | -0.90947800 |
| C | 2.31046600  | -0.74453000 | -1.83052400 |
| H | 3.50713600  | -0.03723000 | 0.35464400  |
| H | 4.39441100  | 0.29377600  | -0.19234000 |
| C | 3.74995300  | -1.44875200 | 0.91243600  |
| H | 3.40440900  | 0.65896700  | 1.19769600  |
| H | 3.91231300  | -2.15363400 | 0.08820100  |
| H | 2.85429300  | -1.79756200 | 1.43805700  |
| C | 4.94053900  | -1.53874000 | 1.88236900  |
| H | 1.40739500  | -0.54195900 | -2.41358200 |
| H | 2.26006500  | -1.80315500 | -1.54883300 |
| C | 3.52957800  | -0.51274300 | -2.73030800 |
| H | 4.46436900  | -0.80248600 | -2.24347000 |
| H | 3.61556700  | 0.54122700  | -3.01405300 |
| H | 3.44690800  | -1.09552300 | -3.65171000 |
| C | -3.77086000 | -1.44394500 | -2.58344500 |
| H | -3.99192700 | -2.50181400 | -0.73129400 |
| H | -2.53439800 | -2.92552200 | -1.59662800 |
| H | -4.41485200 | -0.59648300 | -2.33171500 |
| H | -4.37618600 | -2.17297800 | -3.12992100 |
| H | -3.00461300 | -1.07655300 | -3.27009500 |
| C | 6.30902100  | -1.28504500 | 1.23980300  |
| H | 4.94324700  | -2.53594300 | 2.33642100  |
| H | 4.78723400  | -0.83140400 | 2.70692000  |
| H | 7.11382200  | -1.42062000 | 1.96757300  |
| H | 6.39598800  | -0.26958500 | 0.84435700  |
| H | 6.49026600  | -1.98043800 | 0.41356400  |

### Structure 21

DEHBA\_C\_C3H\_radical

|   |             |             |             |
|---|-------------|-------------|-------------|
| C | -0.73583700 | 1.61820700  | -0.52402800 |
| N | -0.27068800 | 0.32792800  | -0.44596000 |
| O | -1.73426000 | 1.89354300  | -1.18133900 |
| C | 0.00447800  | 2.69682300  | 0.27040600  |
| H | 1.07450600  | 2.66739700  | 0.04314000  |
| H | -0.07919500 | 2.45388300  | 1.33798700  |
| C | -0.54109500 | 4.10348600  | 0.01663500  |
| H | -0.46170600 | 4.33136700  | -1.05013600 |
| C | 0.19204800  | 5.16789800  | 0.83775700  |
| H | 1.26092000  | 5.19373700  | 0.60073100  |
| H | 0.09731600  | 4.98041100  | 1.91254900  |
| H | -0.21299200 | 6.16409000  | 0.64049700  |
| C | 0.96878400  | -0.04869100 | 0.24450900  |
| H | -1.60972000 | 4.12009800  | 0.24355400  |
| H | 1.26092000  | 5.19373700  | 0.60073100  |
| H | -0.21299200 | 6.16409000  | 0.64049700  |

|   |             |             |             |
|---|-------------|-------------|-------------|
| C | 0.96878400  | -0.04869100 | 0.24450900  |
| C | -1.05608000 | -0.71113400 | -1.13514000 |
| H | -1.28738300 | -0.34574100 | -2.13623100 |
| C | -2.36705000 | -1.11367300 | -0.42335400 |
| H | -0.41685400 | -1.59132400 | -1.23986000 |
| C | -3.17385600 | -2.07578600 | -1.31943100 |
| H | -2.94565300 | -0.19504600 | -0.29574700 |
| C | -2.07483500 | -1.72591200 | 0.96103600  |
| H | -1.53429400 | -2.67197500 | 0.81327000  |
| C | -3.26803600 | -1.99755100 | 1.89794300  |
| H | -1.38575700 | -1.06251100 | 1.49614800  |
| H | -2.86442900 | -2.52155400 | 2.77171700  |
| H | -3.96882100 | -2.70258300 | 1.43602700  |
| C | -4.04298200 | -0.75664200 | 2.39182800  |
| H | -4.41889300 | -0.96242400 | 3.40022000  |
| C | -5.23368900 | -0.33271100 | 1.52213600  |
| H | -3.34791900 | 0.08520700  | 2.49965300  |
| H | -5.95824900 | -1.14851800 | 1.43142100  |
| H | -4.93140400 | -0.04388300 | 0.51348200  |
| H | -5.75414300 | 0.52184300  | 1.96444600  |
| H | 1.04843200  | 0.52101300  | 1.17397100  |
| C | 2.27546400  | 0.13519100  | -0.56590300 |
| H | 0.86385400  | -1.09420200 | 0.53970900  |
| H | 2.29409600  | 1.17744400  | -0.90947800 |
| C | 2.31046600  | -0.74453000 | -1.83052400 |
| C | 3.50713600  | -0.03723000 | 0.35464400  |
| H | 4.39441100  | 0.29377600  | -0.19234000 |
| C | 3.74995300  | -1.44875200 | 0.91243600  |
| H | 3.40440900  | 0.65896700  | 1.19769600  |
| H | 3.91231300  | -2.15363400 | 0.08820100  |
| H | 2.85429300  | -1.79756200 | 1.43805700  |
| C | 4.94053900  | -1.53874000 | 1.88236900  |
| H | 1.40739500  | -0.54195900 | -2.41358200 |
| H | 2.26006500  | -1.80315500 | -1.54883300 |
| C | 3.52957800  | -0.51274300 | -2.73030800 |
| H | 4.46436900  | -0.80248600 | -2.24347000 |
| H | 3.61556700  | 0.54122700  | -3.01405300 |
| H | 3.44690800  | -1.09552300 | -3.65171000 |
| C | -3.77086000 | -1.44394500 | -2.58344500 |
| H | -3.99192700 | -2.50181400 | -0.73129400 |
| H | -2.53439800 | -2.92552200 | -1.59662800 |
| H | -4.41485200 | -0.59648300 | -2.33171500 |
| H | -4.37618600 | -2.17297800 | -3.12992100 |
| H | -3.00461300 | -1.07655300 | -3.27009500 |
| C | 6.30902100  | -1.28504500 | 1.23980300  |
| H | 4.94324700  | -2.53594300 | 2.33642100  |
| H | 4.78723400  | -0.83140400 | 2.70692000  |
| H | 7.11382200  | -1.42062000 | 1.96757300  |
| H | 6.39598800  | -0.26958500 | 0.84435700  |
| H | 6.49026600  | -1.98043800 | 0.41356400  |

#### Structure 22

DEHiBA\_C\_C1\_radical

|   |             |             |             |
|---|-------------|-------------|-------------|
| C | 0.49597200  | 2.02591200  | -0.75819800 |
| N | 0.09767200  | 0.72712900  | -0.53994800 |
| O | -0.26178800 | 2.85875500  | -1.24596200 |
| C | 1.91065300  | 2.45908300  | -0.34531200 |
| C | 2.58349500  | 3.19685300  | -1.51244100 |
| C | 1.80658100  | 3.36313600  | 0.89731600  |
| C | 0.95709900  | -0.32328900 | 0.02519500  |
| C | -1.28656200 | 0.36037900  | -0.87360900 |
| H | -1.66929300 | 1.13337200  | -1.54004300 |

|   |             |             |             |
|---|-------------|-------------|-------------|
| C | -2.23868700 | 0.20013700  | 0.33470200  |
| H | -1.26620600 | -0.58093200 | -1.42945600 |
| C | -2.33504400 | 1.50080600  | 1.15278300  |
| H | -1.82239400 | -0.57727500 | 0.99172100  |
| C | -3.61480900 | -0.30215500 | -0.17891500 |
| H | -4.30971200 | 0.54324000  | -0.21735500 |
| C | -4.22299600 | -1.45388100 | 0.63637600  |
| H | -3.51296800 | -0.64585100 | -1.21647000 |
| H | -4.35957200 | -1.14382700 | 1.67885300  |
| H | -3.50068100 | -2.27944600 | 0.65978000  |
| C | -5.55683600 | -1.98587900 | 0.08881500  |
| H | -5.42106100 | -2.28953000 | -0.95686300 |
| C | -6.72559700 | -0.99828400 | 0.18529100  |
| H | -5.81896600 | -2.89817300 | 0.63663200  |
| H | -6.55296900 | -0.09910400 | -0.41197100 |
| H | -6.88899300 | -0.68275300 | 1.22102000  |
| H | -7.65381000 | -1.45340400 | -0.17146800 |
| H | 1.49439900  | 0.07222800  | 0.88884700  |
| C | 1.96073800  | -0.97450800 | -0.95644100 |
| H | 0.29399200  | -1.09464600 | 0.42378900  |
| H | 2.56420400  | -0.16599400 | -1.38658200 |
| C | 1.28103000  | -1.68029600 | -2.15072700 |
| C | 2.92357900  | -1.91643000 | -0.20101500 |
| H | 2.34990800  | -2.59197800 | 0.44649400  |
| C | 4.00376100  | -1.21450000 | 0.63397200  |
| H | 3.42259700  | -2.56072300 | -0.93527400 |
| H | 3.54381000  | -0.57453700 | 1.39659200  |
| H | 4.58303800  | -0.54617200 | -0.01618100 |
| C | 4.96044800  | -2.19238000 | 1.32729600  |
| H | 2.06490100  | -1.93851300 | -2.87216700 |
| H | 0.63342500  | -0.96203000 | -2.66349100 |
| C | 0.48430300  | -2.94961100 | -1.82163800 |
| H | -0.32338600 | -2.76178500 | -1.10835800 |
| H | 1.12129400  | -3.73086400 | -1.39878100 |
| H | 0.02661100  | -3.35716800 | -2.72709900 |
| C | -3.15852600 | 1.39556900  | 2.44052100  |
| H | -2.74804900 | 2.28857300  | 0.51282500  |
| H | -1.32332600 | 1.82812200  | 1.41064900  |
| H | -2.76800700 | 0.61548600  | 3.10269200  |
| H | -3.13229500 | 2.33967200  | 2.99199900  |
| H | -4.20849000 | 1.16593700  | 2.24041200  |
| C | 6.04806800  | -1.49488500 | 2.14928200  |
| H | 5.42887000  | -2.83404300 | 0.57113800  |
| H | 4.38353500  | -2.86119900 | 1.97757400  |
| H | 6.66416100  | -0.84483300 | 1.52002100  |
| H | 6.71269700  | -2.21924000 | 2.62800900  |
| H | 5.61171000  | -0.87372700 | 2.93794300  |
| H | 1.98130500  | 4.05533300  | -1.81442600 |
| H | 2.70108100  | 2.54589600  | -2.38359700 |
| H | 3.57571400  | 3.54865300  | -1.21575000 |
| H | 1.18515500  | 4.23449000  | 0.67960100  |
| H | 2.79931100  | 3.71073600  | 1.19688000  |
| H | 1.36444800  | 2.83505000  | 1.74745100  |

#### Structure 23

DEHiBA\_C\_C21H\_radical

|   |             |             |             |
|---|-------------|-------------|-------------|
| C | 0.49597200  | 2.02591200  | -0.75819800 |
| N | 0.09767200  | 0.72712900  | -0.53994800 |
| O | -0.26178800 | 2.85875500  | -1.24596200 |
| C | 1.91065300  | 2.45908300  | -0.34531200 |
| C | 2.58349500  | 3.19685300  | -1.51244100 |
| C | 1.80658100  | 3.36313600  | 0.89731600  |
| C | 0.95709900  | -0.32328900 | 0.02519500  |
| C | -1.28656200 | 0.36037900  | -0.87360900 |
| H | -1.66929300 | 1.13337200  | -1.54004300 |

|   |             |             |             |
|---|-------------|-------------|-------------|
| C | 1.80658100  | 3.36313600  | 0.89731600  |
| C | 0.95709900  | -0.32328900 | 0.02519500  |
| C | -1.28656200 | 0.36037900  | -0.87360900 |
| H | -1.66929300 | 1.13337200  | -1.54004300 |
| C | -2.23868700 | 0.20013700  | 0.33470200  |
| H | -1.26620600 | -0.58093200 | -1.42945600 |
| C | -2.33504400 | 1.50080600  | 1.15278300  |
| H | -1.82239400 | -0.57727500 | 0.99172100  |
| C | -3.61480900 | -0.30215500 | -0.17891500 |
| H | -4.30971200 | 0.54324000  | -0.21735500 |
| C | -4.22299600 | -1.45388100 | 0.63637600  |
| H | -3.51296800 | -0.64585100 | -1.21647000 |
| H | -4.35957200 | -1.14382700 | 1.67885300  |
| H | -3.50068100 | -2.27944600 | 0.65978000  |
| C | -5.55683600 | -1.98587900 | 0.08881500  |
| H | -5.42106100 | -2.28953000 | -0.95686300 |
| C | -6.72559700 | -0.99828400 | 0.18529100  |
| H | -5.81896600 | -2.89817300 | 0.63663200  |
| H | -6.55296900 | -0.09910400 | -0.41197100 |
| H | -6.88899300 | -0.68275300 | 1.22102000  |
| H | -7.65381000 | -1.45340400 | -0.17146800 |
| H | 1.49439900  | 0.07222800  | 0.88884700  |
| C | 1.96073800  | -0.97450800 | -0.95644100 |
| H | 0.29399200  | -1.09464600 | 0.42378900  |
| H | 2.56420400  | -0.16599400 | -1.38658200 |
| C | 1.28103000  | -1.68029600 | -2.15072700 |
| C | 2.92357900  | -1.91643000 | -0.20101500 |
| H | 2.34990800  | -2.59197800 | 0.44649400  |
| C | 4.00376100  | -1.21450000 | 0.63397200  |
| H | 3.42259700  | -2.56072300 | -0.93527400 |
| H | 3.54381000  | -0.57453700 | 1.39659200  |
| H | 4.58303800  | -0.54617200 | -0.01618100 |
| C | 4.96044800  | -2.19238000 | 1.32729600  |
| H | 2.06490100  | -1.93851300 | -2.87216700 |
| H | 0.63342500  | -0.96203000 | -2.66349100 |
| C | 0.48430300  | -2.94961100 | -1.82163800 |
| H | -0.32338600 | -2.76178500 | -1.10835800 |
| H | 1.12129400  | -3.73086400 | -1.39878100 |
| H | 0.02661100  | -3.35716800 | -2.72709900 |
| C | -3.15852600 | 1.39556900  | 2.44052100  |
| H | -2.74804900 | 2.28857300  | 0.51282500  |
| H | -1.32332600 | 1.82812200  | 1.41064900  |
| H | -2.76800700 | 0.61548600  | 3.10269200  |
| H | -3.13229500 | 2.33967200  | 2.99199900  |
| H | -4.20849000 | 1.16593700  | 2.24041200  |
| C | 6.04806800  | -1.49488500 | 2.14928200  |
| H | 5.42887000  | -2.83404300 | 0.57113800  |
| H | 4.38353500  | -2.86119900 | 1.97757400  |
| H | 6.66416100  | -0.84483300 | 1.52002100  |
| H | 6.71269700  | -2.21924000 | 2.62800900  |
| H | 5.61171000  | -0.87372700 | 2.93794300  |
| H | 2.70108100  | 2.54589600  | -2.38359700 |
| H | 3.57571400  | 3.54865300  | -1.21575000 |
| H | 1.18515500  | 4.23449000  | 0.67960100  |
| H | 2.79931100  | 3.71073600  | 1.19688000  |
| H | 1.36444800  | 2.83505000  | 1.74745100  |

#### Structure 24

DEHiBA\_C\_C22H\_radical

|   |             |            |             |
|---|-------------|------------|-------------|
| C | 0.49597200  | 2.02591200 | -0.75819800 |
| N | 0.09767200  | 0.72712900 | -0.53994800 |
| O | -0.26178800 | 2.85875500 | -1.24596200 |

|   |             |             |             |
|---|-------------|-------------|-------------|
| C | 1.91065300  | 2.45908300  | -0.34531200 |
| C | 2.58349500  | 3.19685300  | -1.51244100 |
| H | 2.52458600  | 1.59635200  | -0.08776500 |
| C | 1.80658100  | 3.36313600  | 0.89731600  |
| C | 0.95709900  | -0.32328900 | 0.02519500  |
| C | -1.28656200 | 0.36037900  | -0.87360900 |
| H | -1.66929300 | 1.13337200  | -1.54004300 |
| C | -2.23868700 | 0.20013700  | 0.33470200  |
| H | -1.26620600 | -0.58093200 | -1.42945600 |
| C | -2.33504400 | 1.50080600  | 1.15278300  |
| H | -1.82239400 | -0.57727500 | 0.99172100  |
| C | -3.61480900 | -0.30215500 | -0.17891500 |
| H | -4.30971200 | 0.54324000  | -0.21735500 |
| C | -4.22299600 | -1.45388100 | 0.63637600  |
| H | -3.51296800 | -0.64585100 | -1.21647000 |
| H | -4.35957200 | -1.14382700 | 1.67885300  |
| H | -3.50068100 | -2.27944600 | 0.65978000  |
| C | -5.55683600 | -1.98587900 | 0.08881500  |
| H | -5.42106100 | -2.28953000 | -0.95686300 |
| C | -6.72559700 | -0.99828400 | 0.18529100  |
| H | -5.81896600 | -2.89817300 | 0.63663200  |
| H | -6.55296900 | -0.09910400 | -0.41197100 |
| H | -6.88899300 | -0.68275300 | 1.22102000  |
| H | -7.65381000 | -1.45340400 | -0.17146800 |
| H | 1.49439900  | 0.07222800  | 0.88884700  |
| H | 1.96073800  | -0.97450800 | -0.95644100 |
| H | 0.29399200  | -1.09464600 | 0.42378900  |
| H | 2.56420400  | -0.16599400 | -1.38658200 |
| C | 1.28103000  | -1.68029600 | -2.15072700 |
| C | 2.92357900  | -1.91643000 | -0.20101500 |
| H | 2.34990800  | -2.59197800 | 0.44649400  |
| C | 4.00376100  | -1.21450000 | 0.63397200  |
| H | 3.42259700  | -2.56072300 | -0.93527400 |
| H | 3.54381000  | -0.57453700 | 1.39659200  |
| H | 4.58303800  | -0.54617200 | -0.01618100 |
| C | 4.96044800  | -2.19238000 | 1.32729600  |
| H | 2.06490100  | -1.93851300 | -2.87216700 |
| H | 0.63342500  | -0.96203000 | -2.66349100 |
| C | 0.48430300  | -2.94961100 | -1.82163800 |
| H | -0.32338600 | -2.76178500 | -1.10835800 |
| H | 1.12129400  | -3.73086400 | -1.39878100 |
| H | 0.02661100  | -3.35716800 | -2.72709900 |
| C | -3.15852600 | 1.39556900  | 2.44052100  |
| H | -2.74804900 | 2.28857300  | 0.51282500  |
| H | -1.32332600 | 1.82812200  | 1.41064900  |
| H | -2.76800700 | 0.61548600  | 3.10269200  |
| H | -3.13229500 | 2.33967200  | 2.99199900  |
| H | -4.20849000 | 1.16593700  | 2.24041200  |
| C | 6.04806800  | -1.49488500 | 2.14928200  |
| H | 5.42887000  | -2.83404300 | 0.57113800  |
| H | 4.38353500  | -2.86119900 | 1.97757400  |
| H | 6.66416100  | -0.84483300 | 1.52002100  |
| H | 6.71269700  | -2.21924000 | 2.62800900  |
| H | 5.61171000  | -0.87372700 | 2.93794300  |
| H | 1.98130500  | 4.05533300  | -1.81442600 |
| H | 2.70108100  | 2.54589600  | -2.38359700 |
| H | 3.57571400  | 3.54865300  | -1.21575000 |
| H | 2.79931100  | 3.71073600  | 1.19688000  |
| H | 1.36444800  | 2.83505000  | 1.74745100  |

#### Structure 25

|               |             |             |             |   |             |             |             |
|---------------|-------------|-------------|-------------|---|-------------|-------------|-------------|
| toluene111023 |             |             |             | C | 1.90261900  | -0.00003200 | 0.00840800  |
| C             | 1.21251000  | -0.22245000 | 0.07073000  | C | 1.19967500  | 1.20351100  | 0.00198100  |
| C             | 0.98967000  | -1.60049000 | 0.06353000  | C | -0.19413600 | 1.20055200  | -0.00872600 |
| C             | -0.31087000 | -2.09712000 | -0.00052000 | C | -0.91275300 | 0.00004500  | -0.01130000 |
| C             | -1.38911000 | -1.21630000 | -0.06137000 | C | -2.42351500 | 0.00001500  | 0.00941400  |
| C             | -1.16754000 | 0.16195000  | -0.05424000 | H | -0.73161400 | -2.14362200 | -0.01778700 |
| C             | 0.13480000  | 0.67059000  | 0.02488000  | H | 1.73600400  | -2.14611900 | 0.00163000  |
| C             | 0.37545000  | 2.15069000  | -0.00365000 | H | 2.98673700  | -0.00006200 | 0.01374800  |
| H             | 2.23316000  | 0.15066000  | 0.11339000  | H | 1.73612300  | 2.14605200  | 0.00162600  |
| H             | 1.83165000  | -2.28630000 | 0.10491000  | H | -0.73151100 | 2.14367900  | -0.01778200 |
| H             | -0.48377000 | -3.16986000 | -0.00735000 | H | -2.80170400 | -0.00238200 | 1.03738800  |
| H             | -2.40342000 | -1.60231000 | -0.11743000 | H | -2.82894000 | -0.88282400 | -0.49054700 |
| H             | -2.01821000 | 0.83727000  | -0.10984000 |   |             |             |             |
| H             | 0.48728000  | 2.49177000  | -1.03742000 |   |             |             |             |
| H             | 1.28099000  | 2.40991000  | 0.55493000  |   |             |             |             |
| H             | -0.45701000 | 2.69082000  | 0.45947000  |   |             |             |             |

### Structure 26

|            |             |             |             |  |  |  |  |
|------------|-------------|-------------|-------------|--|--|--|--|
| toluene_H1 |             |             |             |  |  |  |  |
| C          | -0.19419000 | -1.20051900 | -0.00872800 |  |  |  |  |
| C          | 1.19960200  | -1.20355100 | 0.00198200  |  |  |  |  |
| C          | 1.90261900  | -0.00003200 | 0.00840800  |  |  |  |  |
| C          | 1.19967500  | 1.20351100  | 0.00198100  |  |  |  |  |
| C          | -0.19413600 | 1.20055200  | -0.00872600 |  |  |  |  |
| C          | -0.91275300 | 0.00004500  | -0.01130000 |  |  |  |  |
| C          | -2.42351500 | 0.00001500  | 0.00941400  |  |  |  |  |
| H          | -0.73161400 | -2.14362200 | -0.01778700 |  |  |  |  |
| H          | 1.73600400  | -2.14611900 | 0.00163000  |  |  |  |  |
| H          | 2.98673700  | -0.00006200 | 0.01374800  |  |  |  |  |
| H          | 1.73612300  | 2.14605200  | 0.00162600  |  |  |  |  |
| H          | -0.73151100 | 2.14367900  | -0.01778200 |  |  |  |  |
| H          | -2.82894000 | -0.88282400 | -0.49054700 |  |  |  |  |
| H          | -2.82891400 | 0.88515300  | -0.48646000 |  |  |  |  |

### Structure 27

|            |             |             |             |  |  |  |  |
|------------|-------------|-------------|-------------|--|--|--|--|
| toluene_H2 |             |             |             |  |  |  |  |
| C          | -0.19419000 | -1.20051900 | -0.00872800 |  |  |  |  |
| C          | 1.19960200  | -1.20355100 | 0.00198200  |  |  |  |  |
| C          | 1.90261900  | -0.00003200 | 0.00840800  |  |  |  |  |
| C          | 1.19967500  | 1.20351100  | 0.00198100  |  |  |  |  |
| C          | -0.19413600 | 1.20055200  | -0.00872600 |  |  |  |  |
| C          | -0.91275300 | 0.00004500  | -0.01130000 |  |  |  |  |
| C          | -2.42351500 | 0.00001500  | 0.00941400  |  |  |  |  |
| H          | -0.73161400 | -2.14362200 | -0.01778700 |  |  |  |  |
| H          | 1.73600400  | -2.14611900 | 0.00163000  |  |  |  |  |
| H          | 2.98673700  | -0.00006200 | 0.01374800  |  |  |  |  |
| H          | 1.73612300  | 2.14605200  | 0.00162600  |  |  |  |  |
| H          | -0.73151100 | 2.14367900  | -0.01778200 |  |  |  |  |
| H          | -2.80170400 | -0.00238200 | 1.03738800  |  |  |  |  |

### Structure 28

|            |             |             |             |  |  |  |  |
|------------|-------------|-------------|-------------|--|--|--|--|
| toluene_H3 |             |             |             |  |  |  |  |
| C          | -0.19419000 | -1.20051900 | -0.00872800 |  |  |  |  |
| C          | 1.19960200  | -1.20355100 | 0.00198200  |  |  |  |  |

## References

- 1 L. C. Moores, D. Kaur, M. D. Smith and J. S. Poole, *J. Org. Chem.*, 2019, **84**, 3260-3269.
- 2 J. W. T. Spinks and R. J. Woods, *An introduction to radiation chemistry*, New York, NY (USA); John Wiley and Sons Inc., United States, 3 edn., 1990, 243-451.
- 3 M. J. Frisch, G. W. Trucks, H. B. Schlegel, G. E. Scuseria, M. A. Robb, J. R. Cheeseman, G. Scalmani, V. Barone, G. A. Petersson, H. Nakatsuji, X. Li, M. Caricato, A. V. Marenich, J. Bloino, B. G. Janesko, R. Gomperts, B. Mennucci, H. P. Hratchian, J. V. Ortiz, A. F. Izmaylov, J. L. Sonnenberg, Williams, F. Ding, F. Lipparini, F. Egidi, J. Goings, B. Peng, A. Petrone, T. Henderson, D. Ranasinghe, V. G. Zakrzewski, J. Gao, N. Rega, G. Zheng, W. Liang, M. Hada, M. Ehara, K. Toyota, R. Fukuda, J. Hasegawa, M. Ishida, T. Nakajima, Y. Honda, O. Kitao, H. Nakai, T. Vreven, K. Throssell, J. A. Montgomery Jr., J. E. Peralta, F. Ogliaro, M. J. Bearpark, J. J. Heyd, E. N. Brothers, K. N. Kudin, V. N. Staroverov, T. A. Keith, R. Kobayashi, J. Normand, K. Raghavachari, A. P. Rendell, J. C. Burant, S. S. Iyengar, J. Tomasi, M. Cossi, J. M. Millam, M. Klene, C. Adamo, R. Cammi, J. W. Ochterski, R. L. Martin, K. Morokuma, O. Farkas, J. B. Foresman and D. J. Fox, Gaussian, Inc., Wallingford CT, 2016.
- 4 M. D. Hanwell, D. E. Curtis, D. C. Lonie, T. Vandermeersch, E. Zurek and G. R. Hutchison, *J. Cheminform.*, 2012, **4**, 17.
- 5 T. A. Halgren, *J. Comput. Chem.*, 1996, **17**, 490-519.
- 6 T. A. Halgren and R. B. Nachbar, *J. Comput. Chem.*, 1996, **17**, 587-615.
- 7 B. J. Mincher, G. Modolo and S. P. Mezyk, *Solvent Extr. Ion Exch.*, 2009, **27**, 1-25.
- 8 J. Drader, G. Saint-Louis, J. M. Muller, M. C. Charbonnel, P. Guilbaud, L. Berthon, K. M. Roscioli-Johnson, C. A. Zarzana, C. Rae, G. S. Groenewold, B. J. Mincher, S. P. Mezyk, K. McCann, S. G. Boyes and J. Braley, *Solvent Extr. Ion Exch.*, 2017, **35**, 480-495.
- 9 J. A. Drader, N. Boubals, B. Camès, D. Guillaumont, P. Guilbaud, G. Saint-Louis and L. Berthon, *Dalton Trans.*, 2018, **47**, 251-263.
- 10 G. P. Horne, C. A. Zarzana, T. S. Grimes, C. Rae, J. Ceder, S. P. Mezyk, B. J. Mincher, M.-C. Charbonnel, P. Guilbaud, G. Saint-Louis and L. Berthon, *Dalton Trans.*, 2019, **48**, 14450-14460.
